# Supplementary material
Source: PubMed Central journal article supplement (PMC6644404)

# Room-temperature, Copper-Free Sonogashira Reactions

## Facilitated by Air-stable, Mono-ligated Precatalyst

### [DTBNpP] Pd(crotyl)Cl

Katherine Pohida<sup>†</sup>, David J. Maloney<sup>†</sup>, Bryan T. Mott<sup>\*†</sup>, Ganesha Rai<sup>\*†</sup>

<sup>†</sup>National Center for Advancing Translational Sciences, National Institutes of Health, 9800 Medical Center Drive, Rockville, Maryland 20850, United States.

#### Supporting information

##### Table of Contents

|                                         |    |
|-----------------------------------------|----|
| 1. Additional Tables .....              | S2 |
| 2. Catalyst Characterization Data ..... | S2 |
| 3. Compound Characterization Data ..... | S5 |

## 1. Additional Tables

**Table S1. Evaluation of Alternate and Sustainable Solvents with optimized base (TMP).<sup>a</sup>**

| entry | base | solvent   | 3 (yield, %) <sup>b</sup> |          |
|-------|------|-----------|---------------------------|----------|
|       |      |           | t = 2 h                   | t = 18 h |
| 1     | TMP  | THF       | 26                        | 70       |
| 2     | TMP  | 2-MeTHF   | 36                        | 58       |
| 3     | TMP  | Sulfolane | 43                        | 70       |
| 4     | TMP  | EtOAc     | 40                        | 62       |
| 5     | TMP  | ACN       | 77                        | 100      |

<sup>a</sup>Reaction conditions: **1** (0.5 mmol), **2** (0.8 mmol), **P2** (.0025 mmol, 5 mol%), TMP (1.0 mmol), solvent (2.5 mL), rt for 18 h with argon atmosphere. <sup>b</sup>Yield was determined by LC/MS with pyrene as internal standard.

## 2. Catalyst Characterization Data

**Figure S1:** <sup>1</sup>H NMR for [DTBNpP] Pd(crotyl)Cl (**P2**)

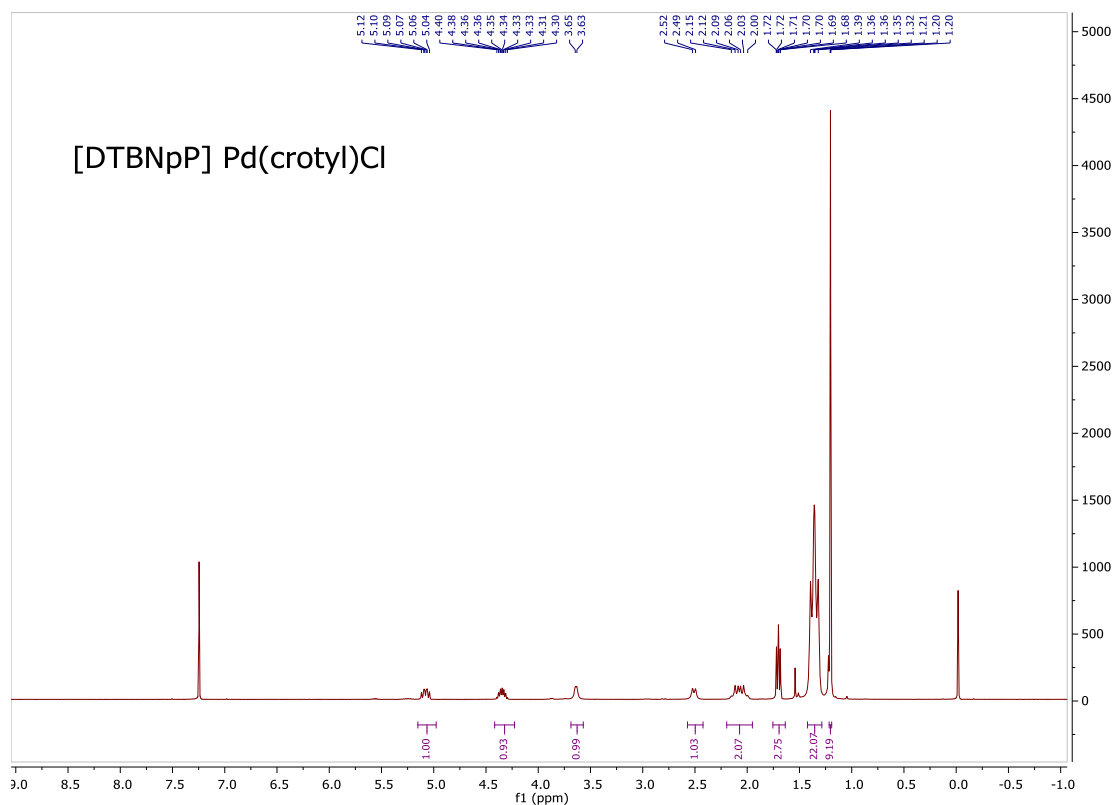

**<sup>1</sup>H NMR** (400 MHz, Chloroform-*d*) δ 5.08 (dt, *J* = 12.5, 8.9 Hz, 1H), 4.35 (ddt, *J* = 15.0, 13.2, 6.5 Hz, 1H), 3.64 (d, *J* = 6.5 Hz, 1H), 2.51 (d, *J* = 11.6 Hz, 1H), 2.06 (dt, *J* = 27.1, 13.7 Hz, 2H), 1.70 (td, *J* = 7.3, 1.2 Hz, 3H), 1.42 – 1.29 (m, 22H), 1.20 (d, *J* = 1.3 Hz, 9H).

**Figure S2:** <sup>1</sup>H NMR for [DTBNpP] Pd(crotyl)Cl sample from JM

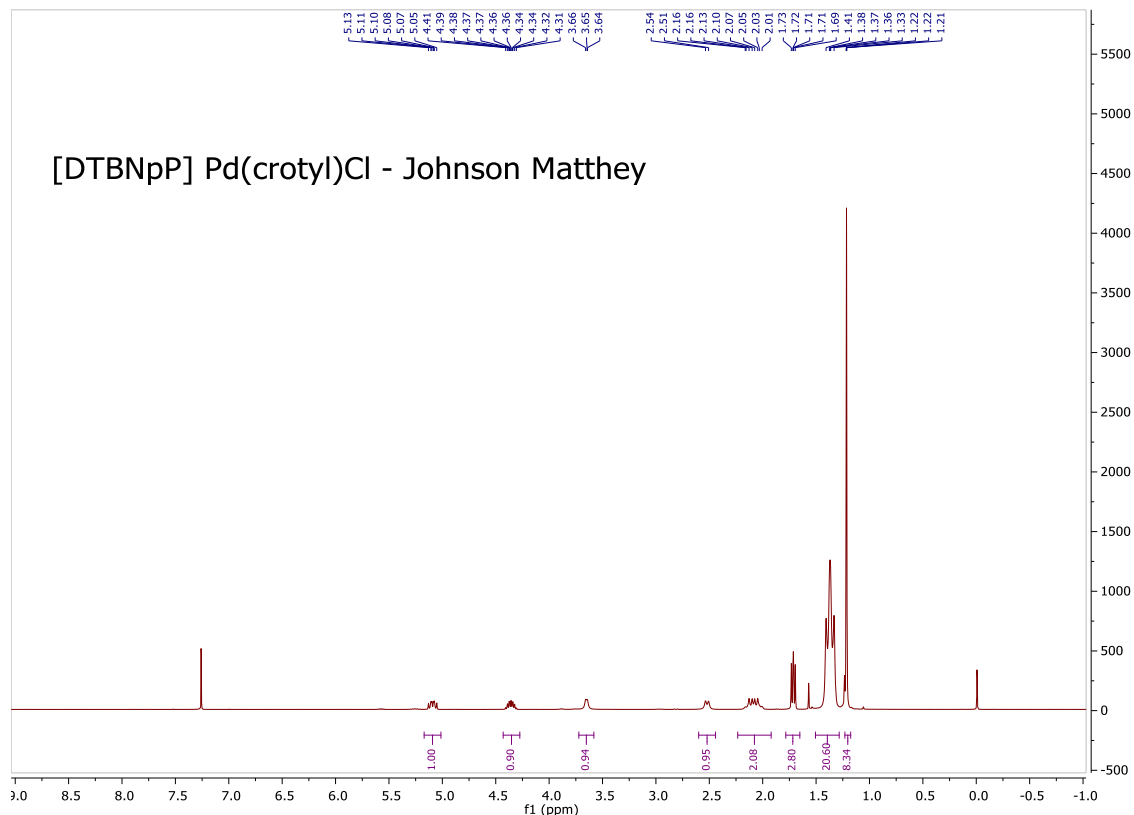

**<sup>1</sup>H NMR** (400 MHz, Chloroform-*d*) δ 5.09 (dt, *J* = 12.7, 9.0 Hz, 1H), 4.43 – 4.27 (m, 1H), 3.72 – 3.58 (m, 1H), 2.52 (d, *J* = 11.5 Hz, 1H), 2.09 (qd, *J* = 16.4, 15.4, 6.9 Hz, 2H), 1.78 – 1.65 (m, 3H), 1.51 – 1.28 (m, 21H), 1.22 (d, *J* = 1.2 Hz, 8H).

**[DTBNpP] Pd( $\eta^3$ -1-*t*-Bu-indenyl)Cl (**P5**)**

*Synthetic procedure:* Synthesis of **P5** follow a modified procedure of Hazari et. al as described in the text. To an oven-dried 100 mL round-bottom flask, di-*tert*-butylneopentylphosphine (10 wt% in hexanes) (5.08 mL, 1.60 mmol) was added into Chloro(1-*t*-butylindenyl)palladium(II) dimer (500 mg, 0.80 mmol, 1.00 equiv) and THF (11 mL). The flask was capped and purged with argon for 5 minutes. The solution was stirred for 2 h at room temperature. The resulting product was filtered, washed with pentane, and dried under vacuum to afford **P5** (red solid, 330 mg, 78%). **<sup>1</sup>H NMR** (400 MHz, DMSO-*d*<sub>6</sub>) δ 7.36 (d, *J* = 7.7 Hz, 1H), 7.05 – 6.92 (m, 2H), 6.84 (t, *J* = 7.4 Hz, 1H), 6.59 (d, *J* = 2.9 Hz, 1H), 5.74 (d, *J* = 2.9 Hz, 1H), 2.29 (dd, *J* = 14.6, 11.7 Hz, 1H), 1.81 (t, *J* = 14.6 Hz, 1H), 1.48 (s, 9H), 1.35 (d, *J* = 13.3 Hz, 9H), 1.18 (d, *J* = 13.0 Hz, 9H), 1.13 (s, 9H). **<sup>13</sup>C NMR** (101 MHz, DMSO-*d*<sub>6</sub>) δ 139.88, 138.60, 138.55, 126.25, 125.57, 125.34,

124.73, 120.26, 119.34, 108.51, 108.45, 67.34, 67.31, 37.81, 37.68, 35.09, 34.97, 34.90, 34.86, 34.04, 33.94, 33.10, 33.03, 31.05, 31.03, 30.68, 30.64, 30.35, 30.30, 29.61, 29.56, 26.98, 12.76.  
<sup>31</sup>P NMR (162 MHz, DMSO-*d*<sub>6</sub>) δ 70.86. HRMS (ESI<sup>+</sup>): Expected 493.2210 [M-Cl]<sup>+</sup> (C<sub>26</sub>H<sub>44</sub>PPd). Observed 493.2242.

**Figure S3:** <sup>1</sup>H NMR

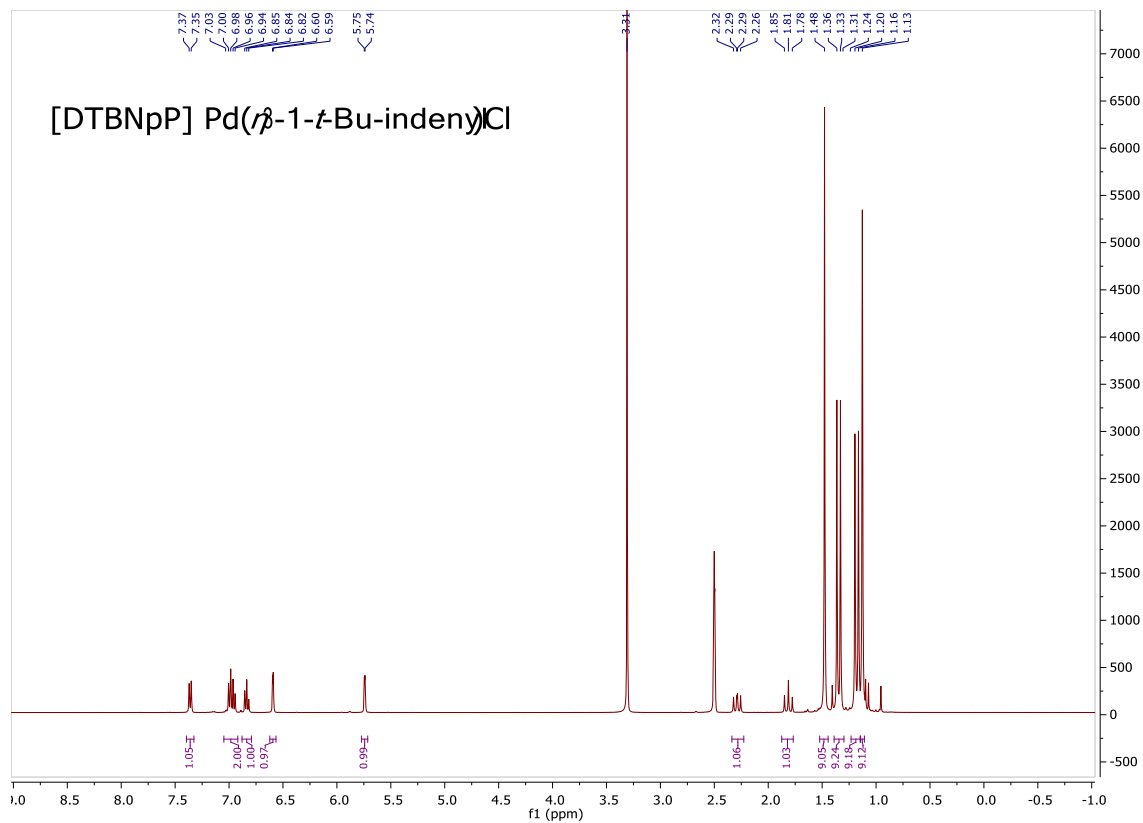

Figure S4:  $^{13}\text{C}$  NMR

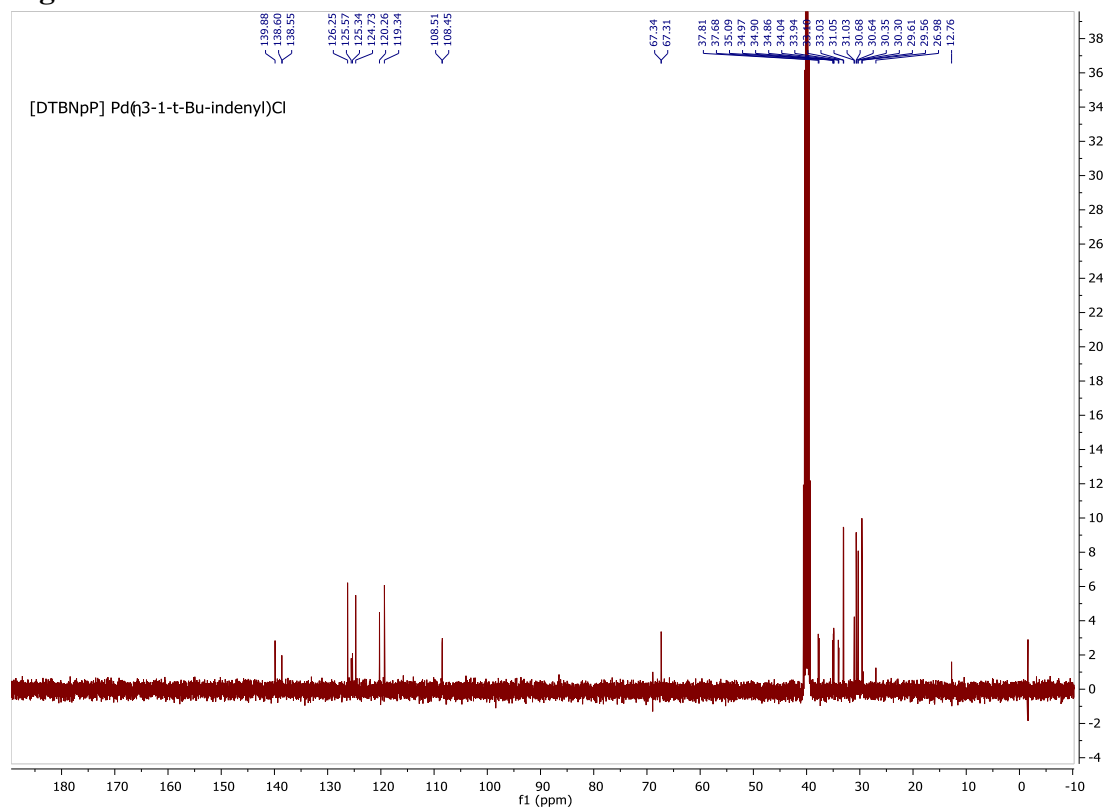

Figure S5:  $^{19}\text{F}$  NMR

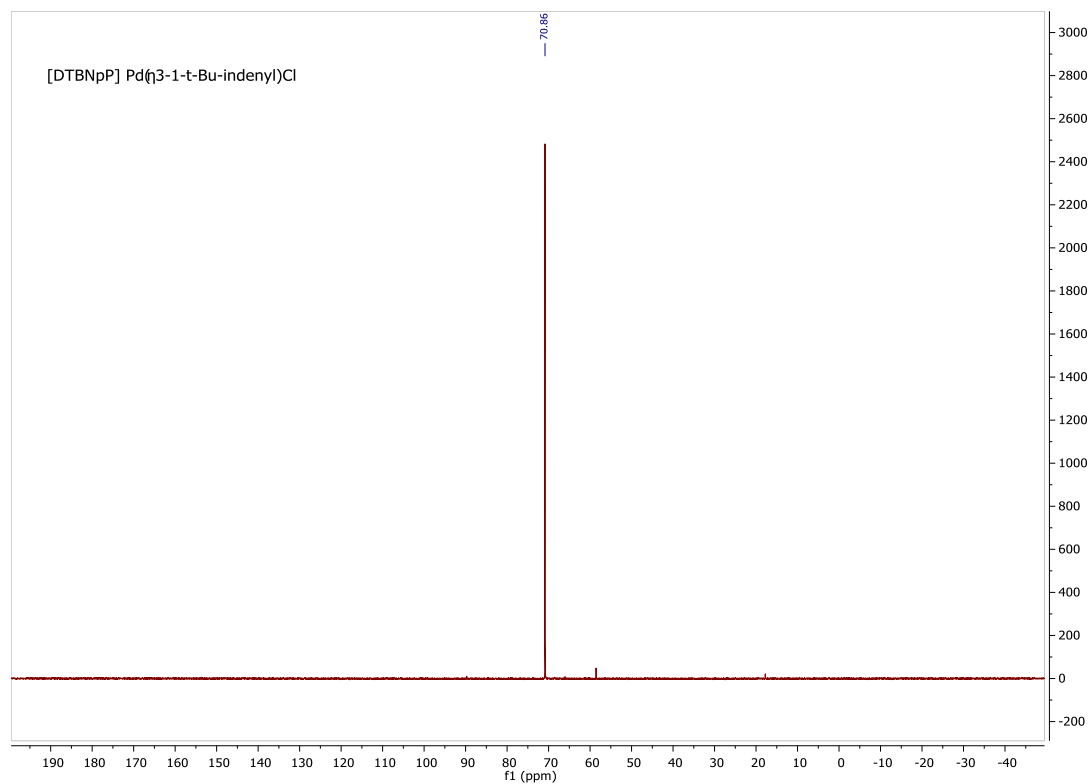

### 3. Compound Characterization Data

#### I. Spectral Data

Figure S6:  $^1\text{H}$  NMR

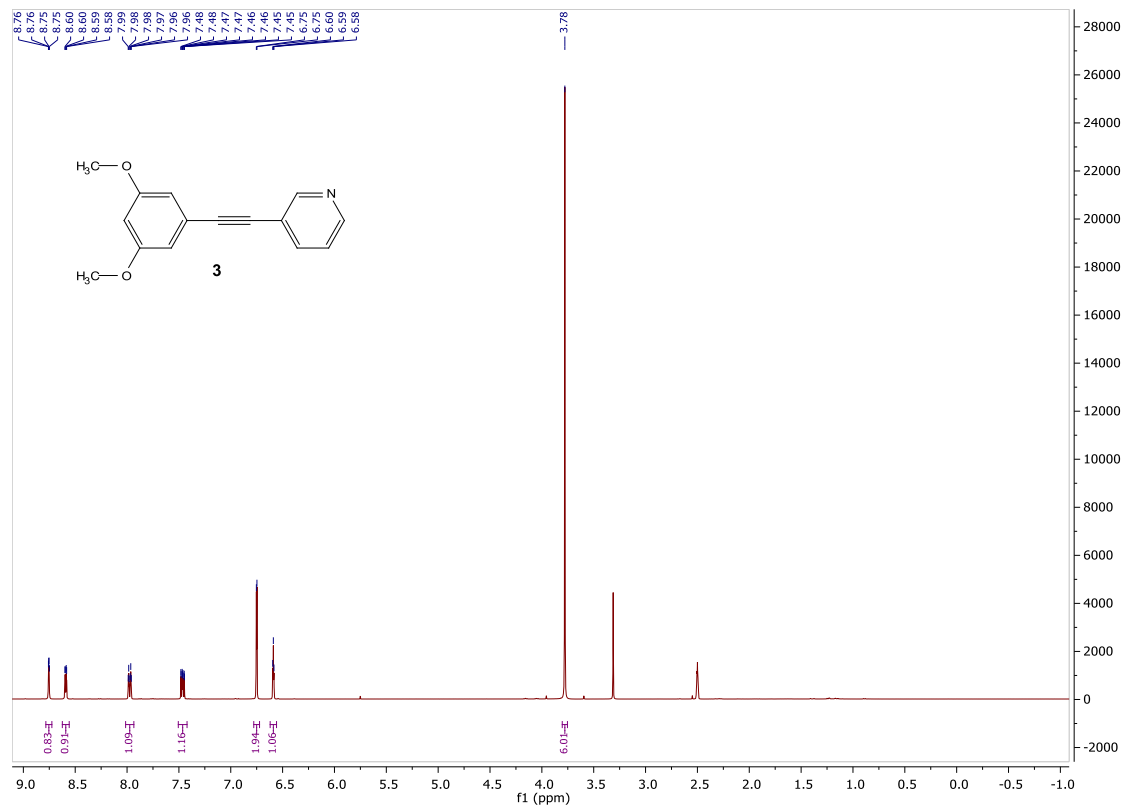

Figure S7:  $^{13}\text{C}$  NMR

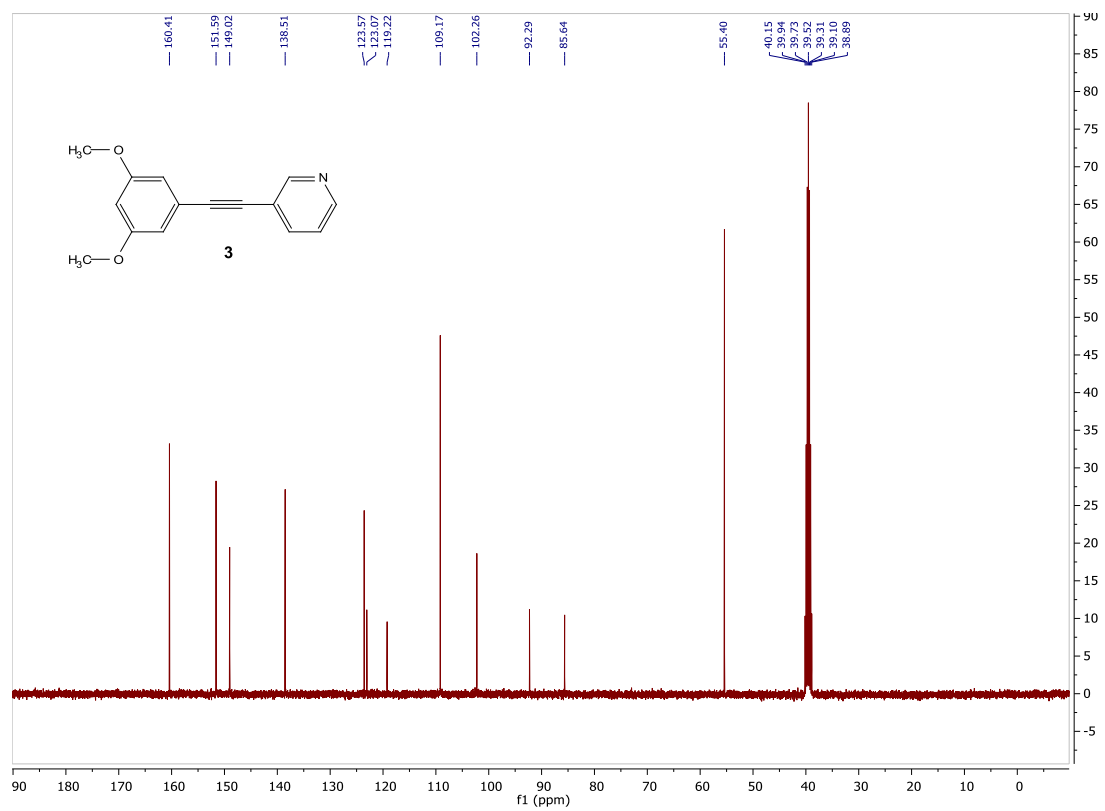

Figure S8:  $^1\text{H}$  NMR

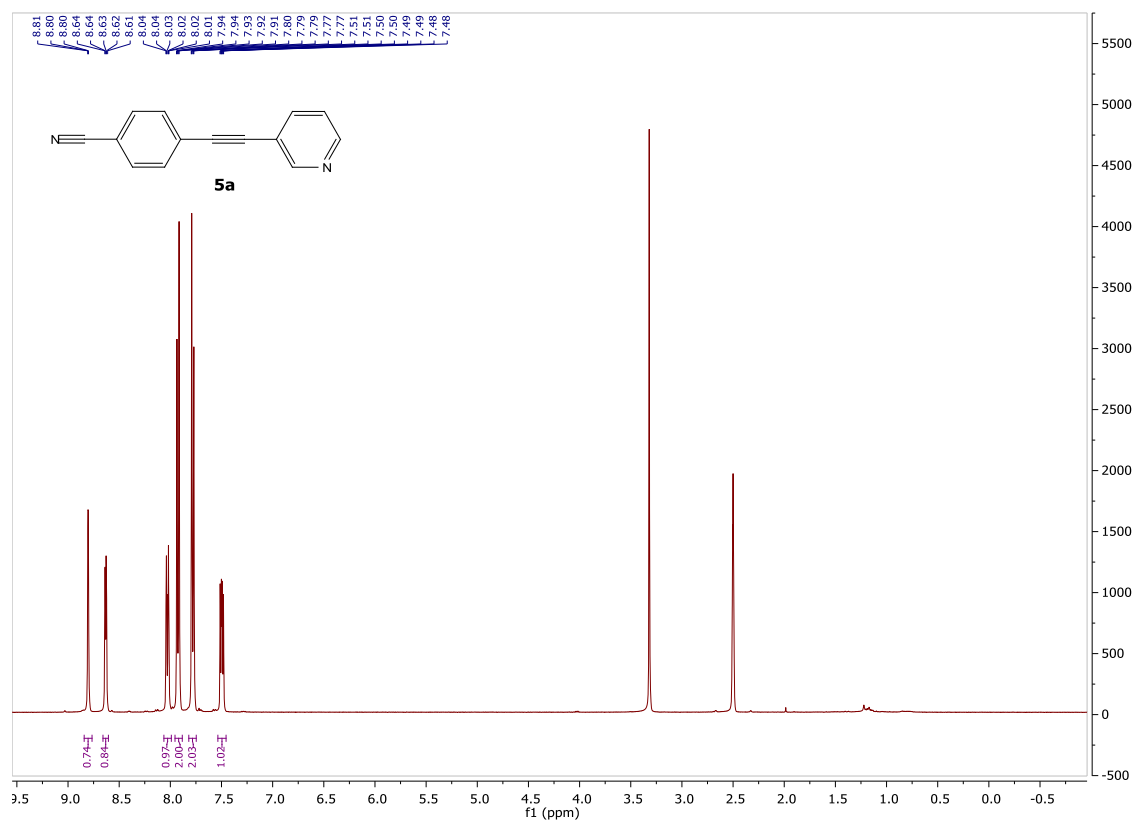



Figure S9:  $^{13}\text{C}$  NMR

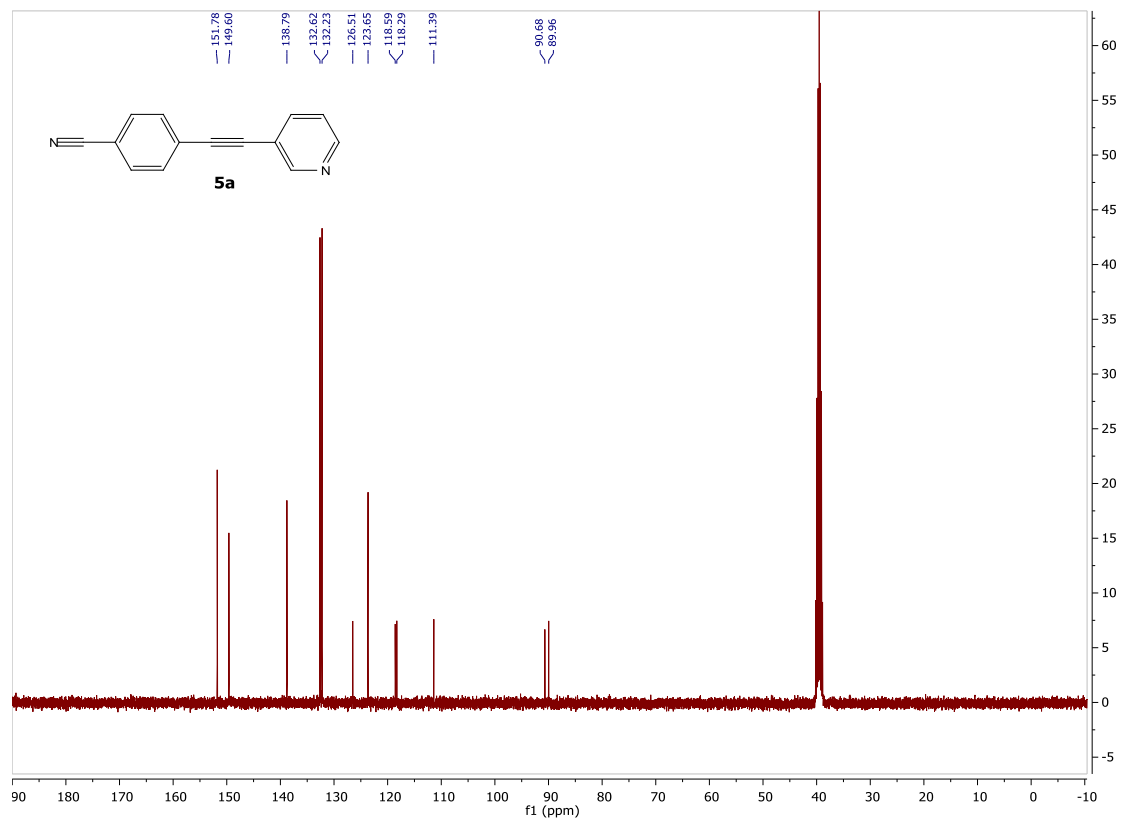

Figure S10: 1H NMR

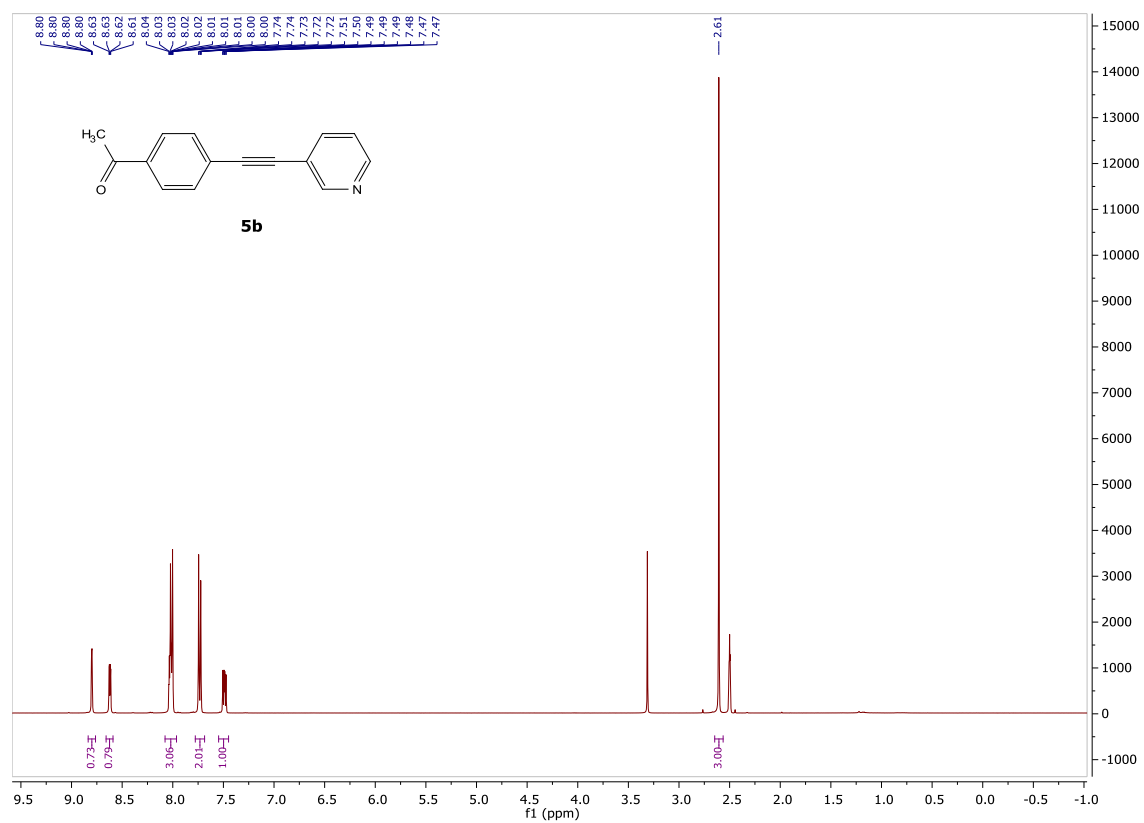

Figure S11: <sup>13</sup>C NMR

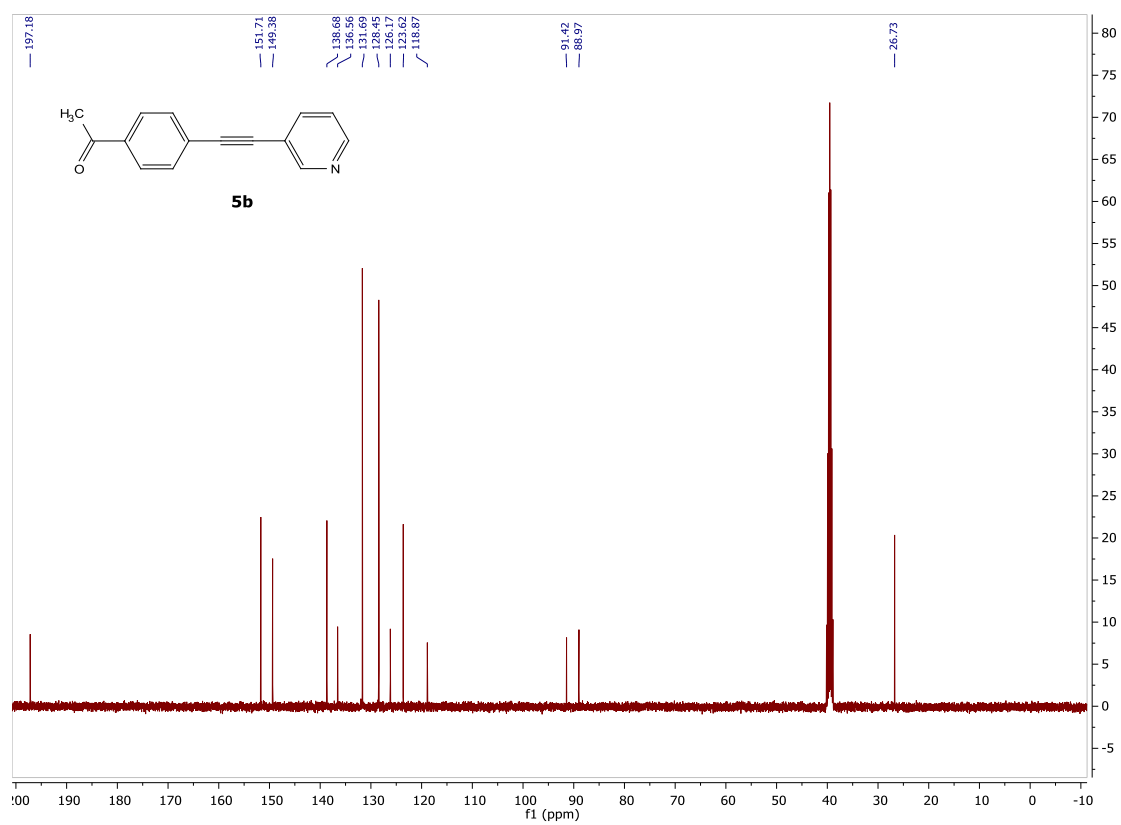

Figure S12: <sup>1</sup>H NMR

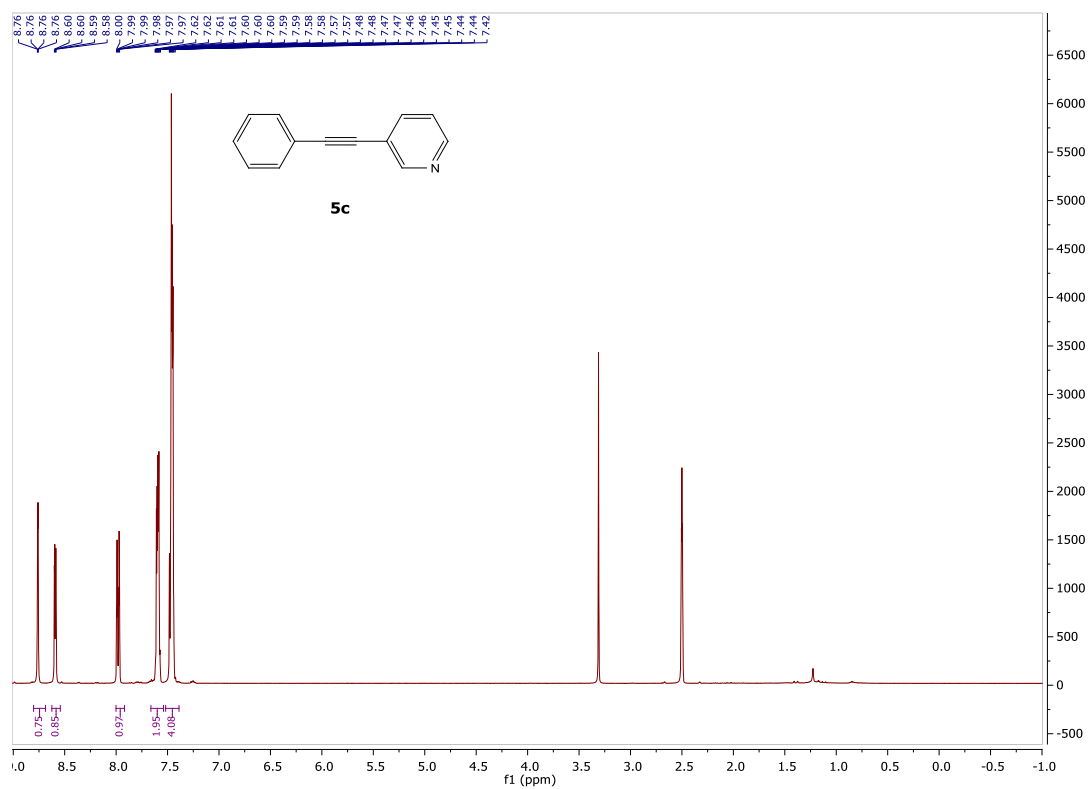

Figure S13:  $^{13}\text{C}$  NMR

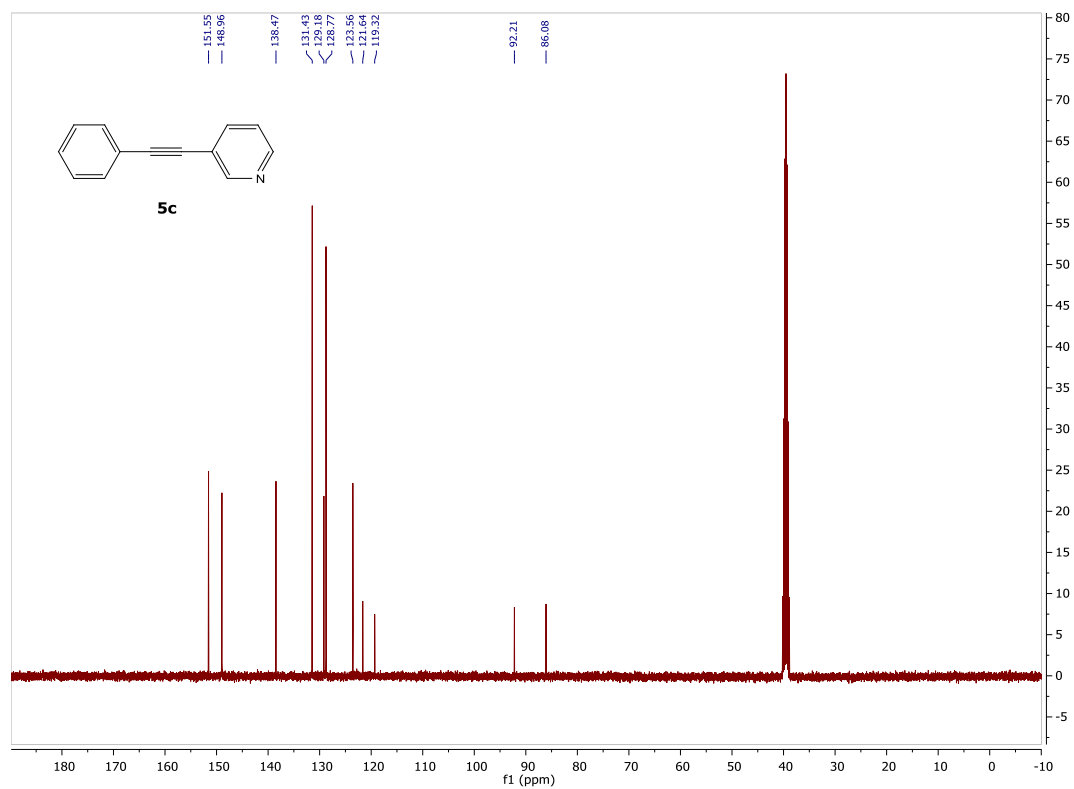

**Figure S14:**  $^1\text{H}$  NMR

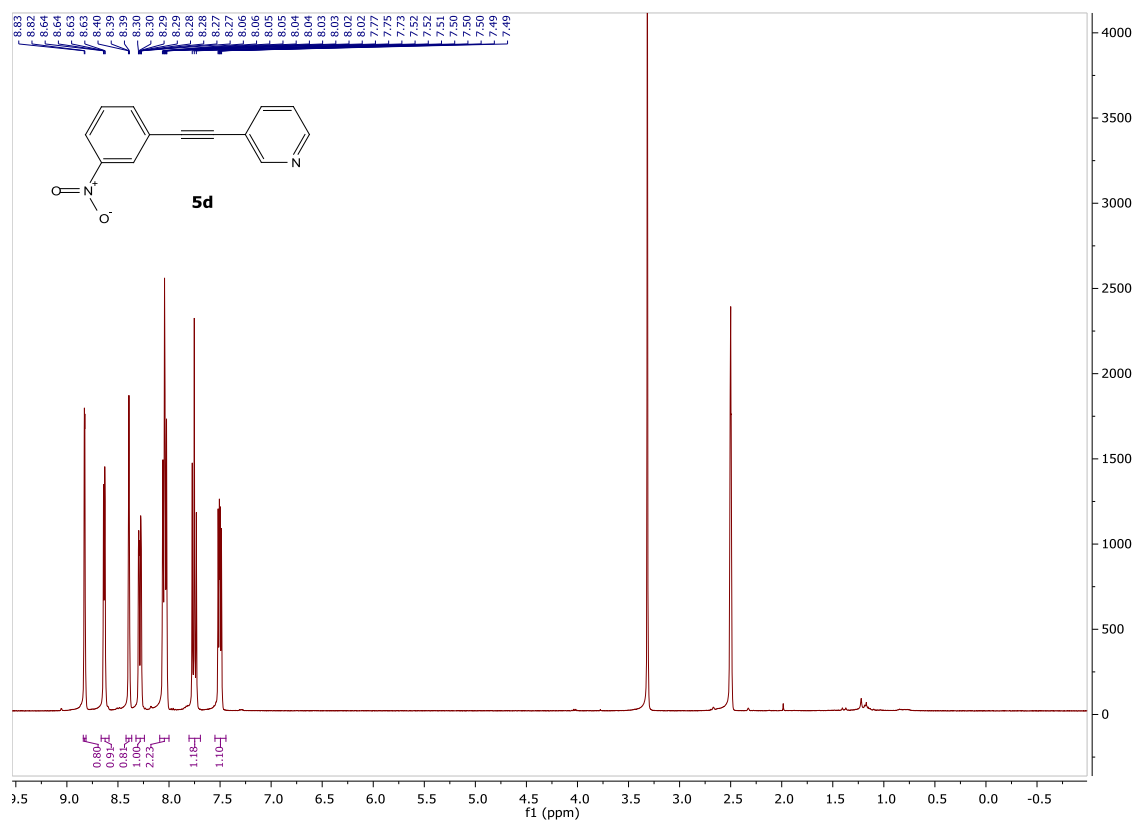

Figure S15:  $^{13}\text{C}$  NMR

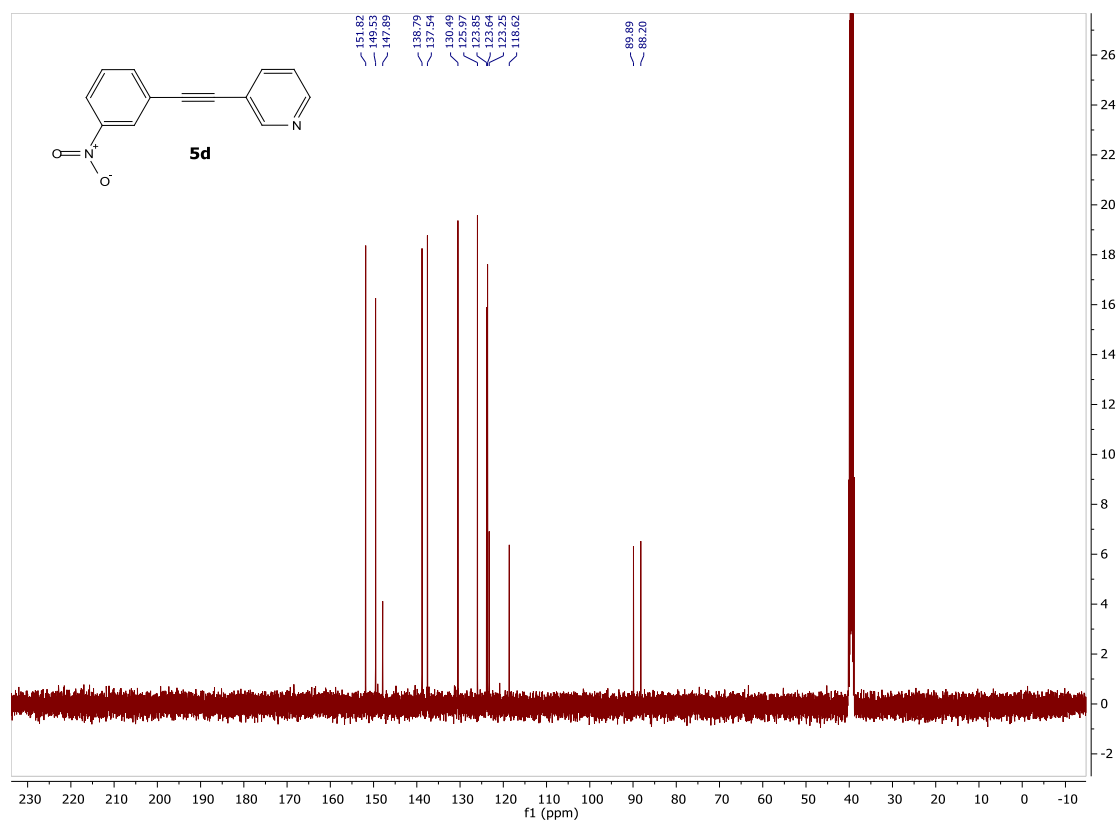

Figure S16:  $^1\text{H}$  NMR

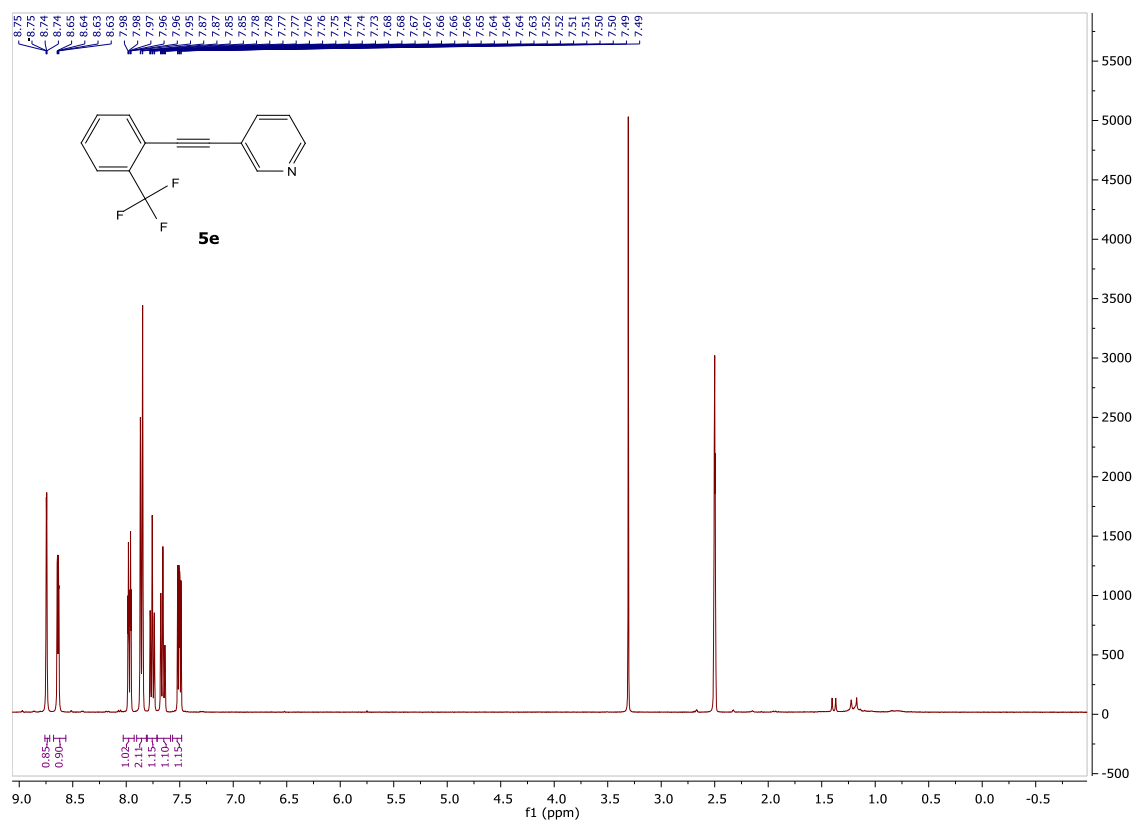



Figure S17:  $^{13}\text{C}$  NMR

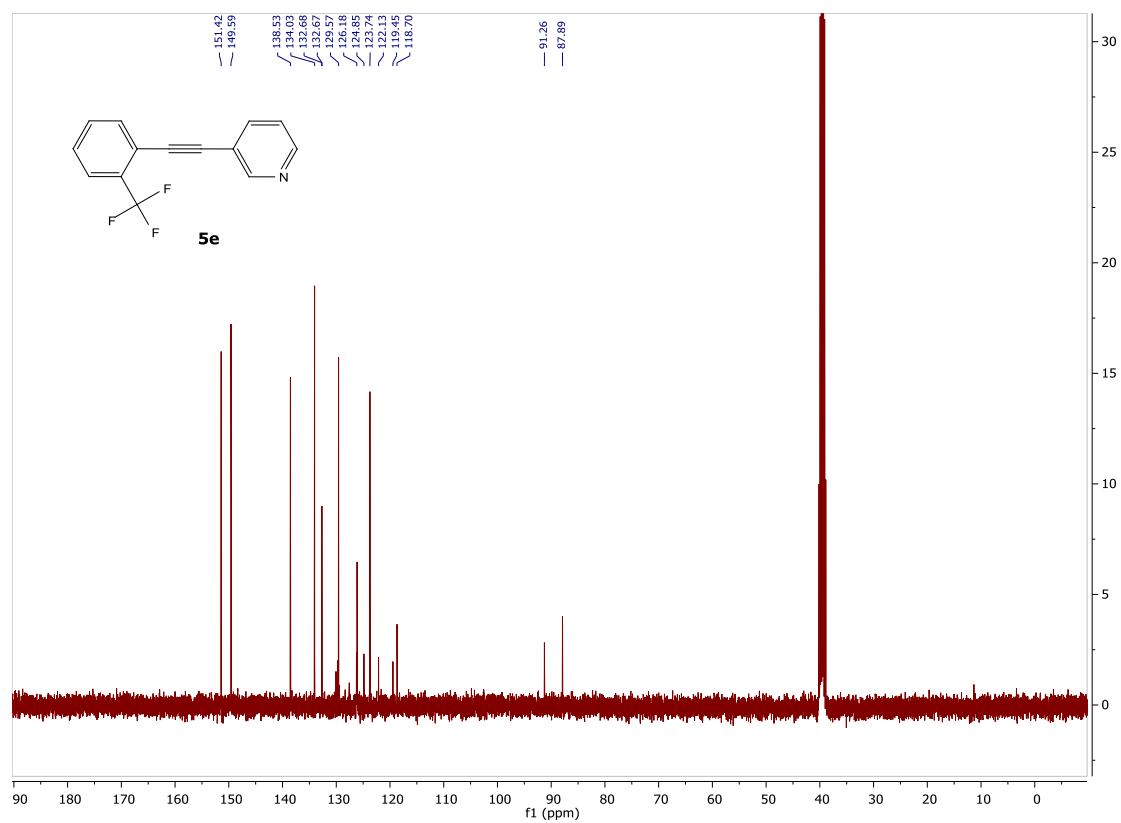

Figure S18:  $^1\text{H}$  NMR

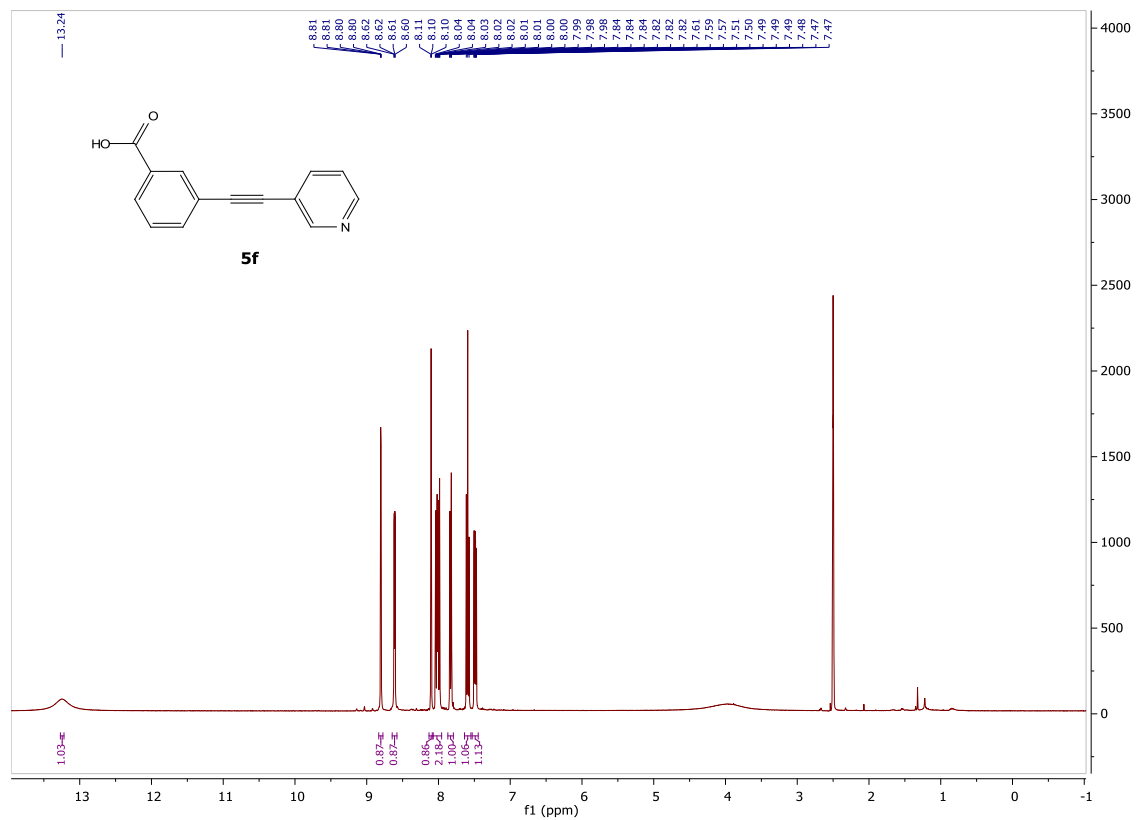

Figure S19:  $^{13}\text{C}$  NMR

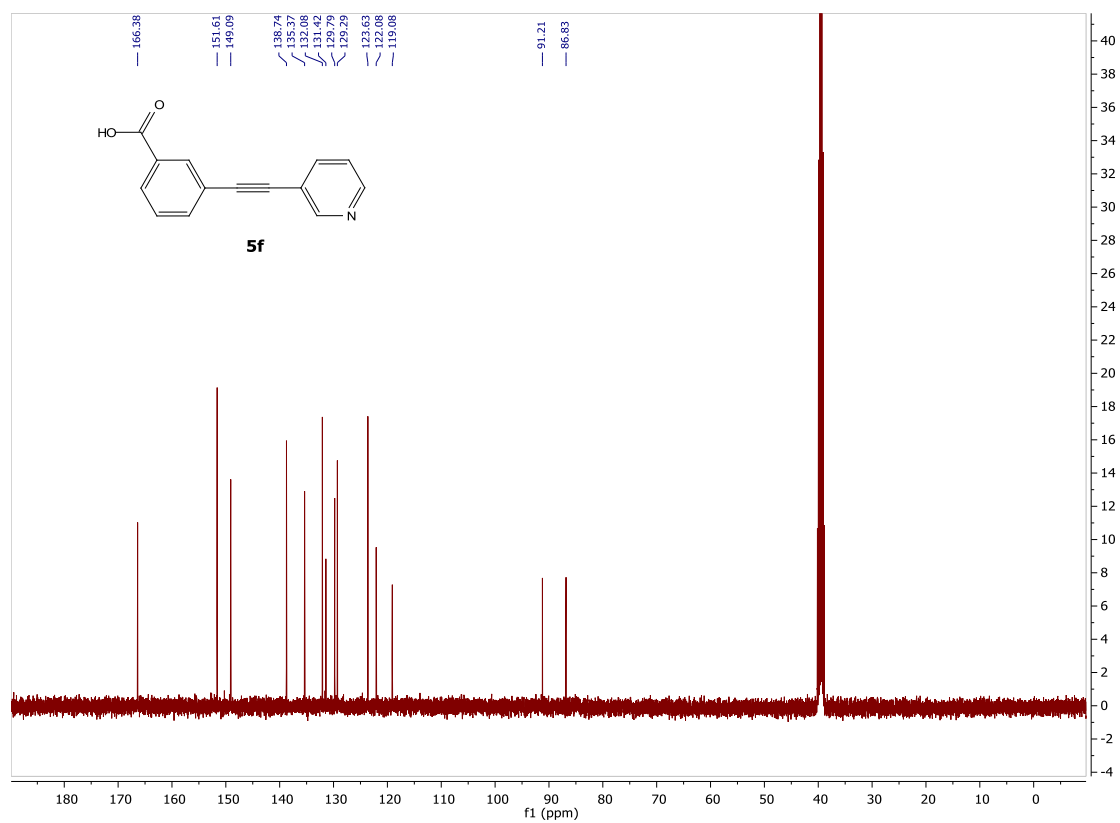

Figure S20:  $^1\text{H}$  NMR

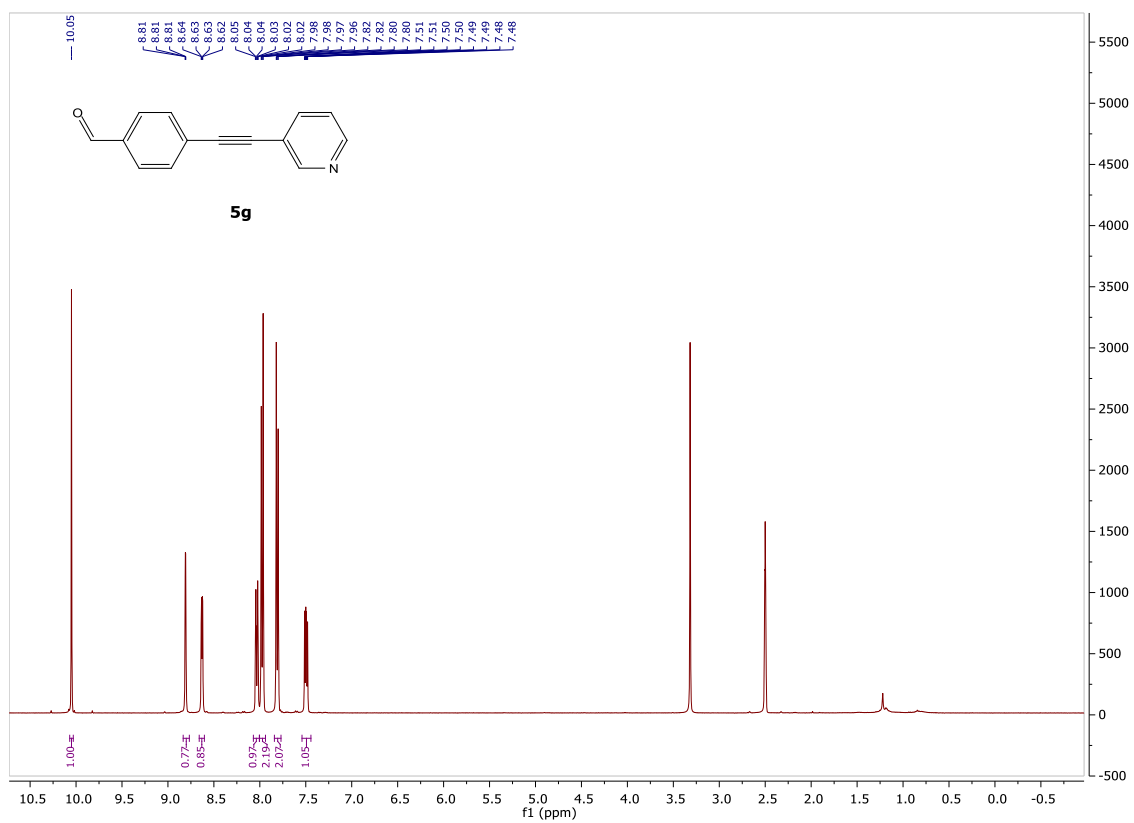

Figure S21:  $^{13}\text{C}$  NMR

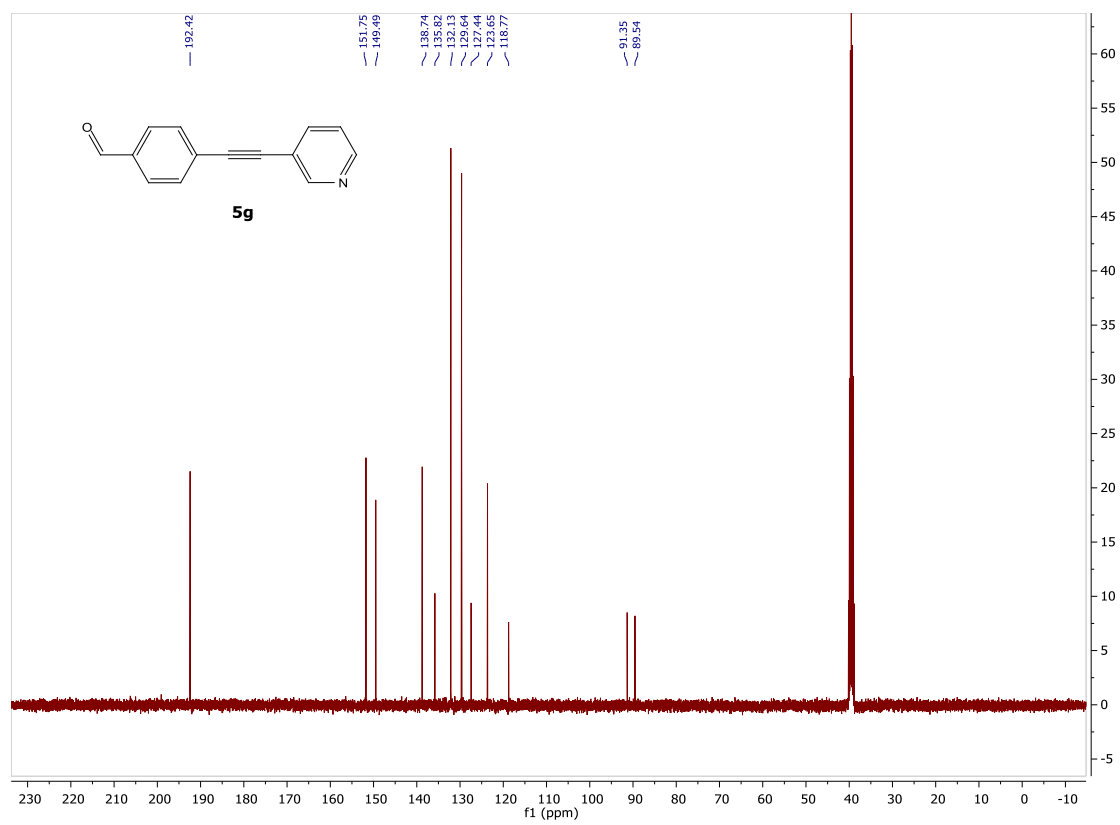

Figure S22: <sup>1</sup>H NMR

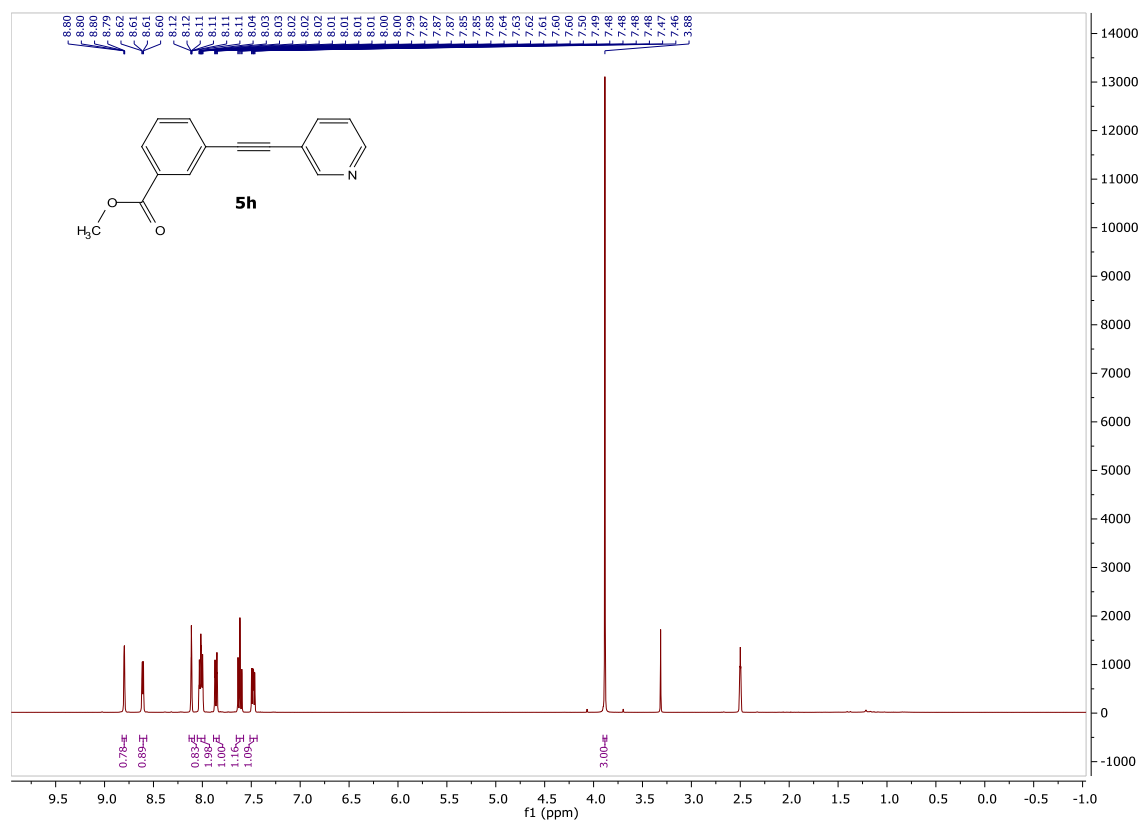

Figure S23:  $^{13}\text{C}$  NMR

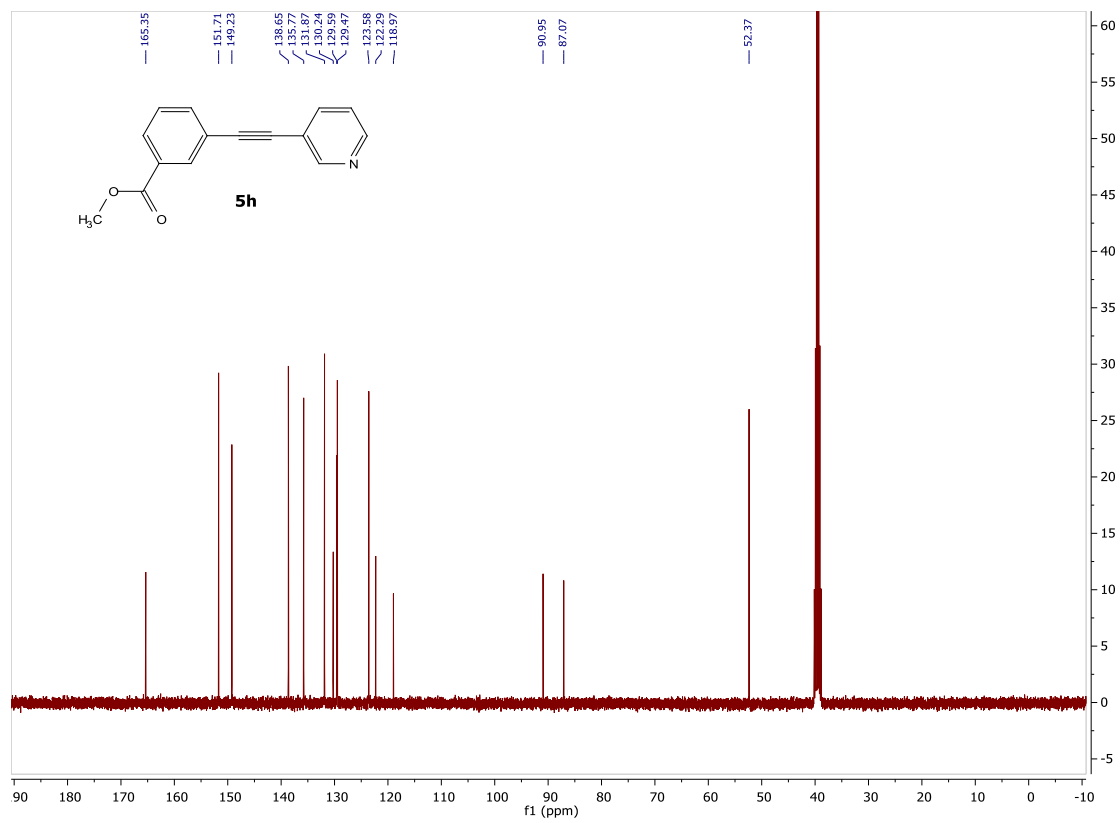

Figure S24: <sup>1</sup>H NMR

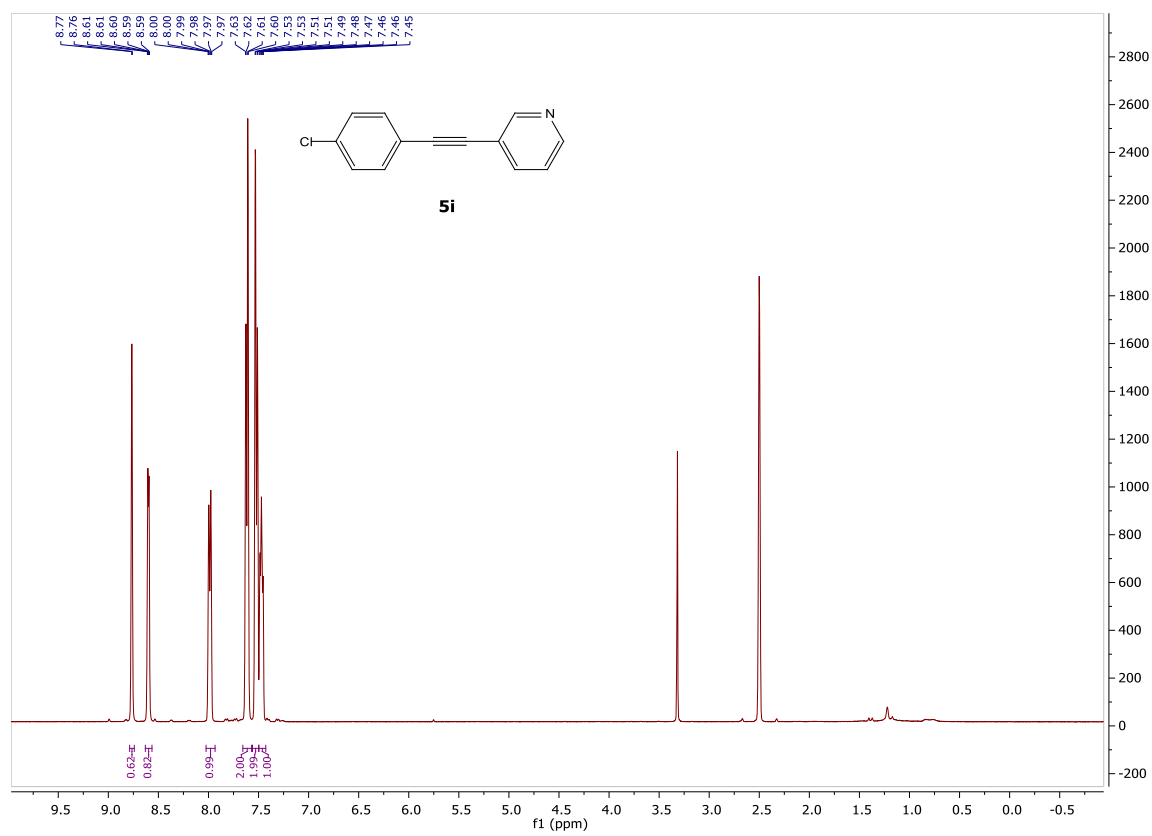



Figure S25:  $^{13}\text{C}$  NMR

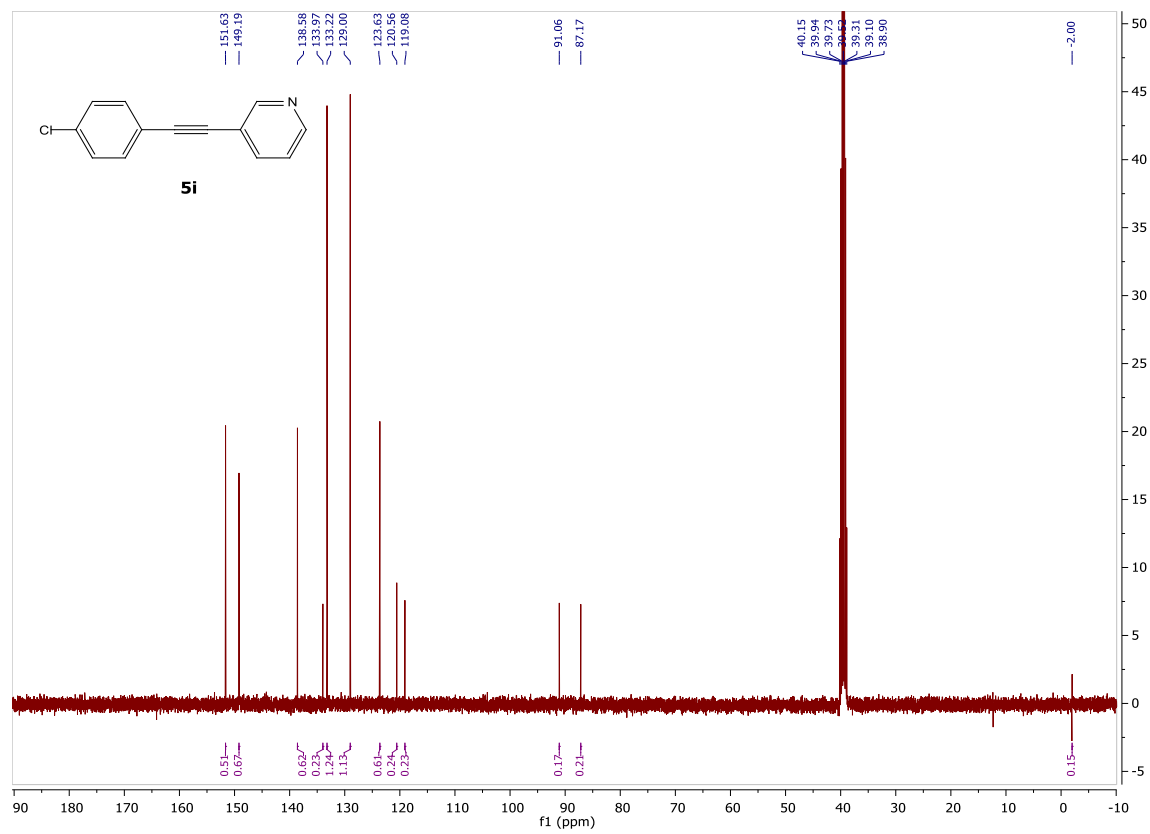

Figure S26:  $^1\text{H}$  NMR

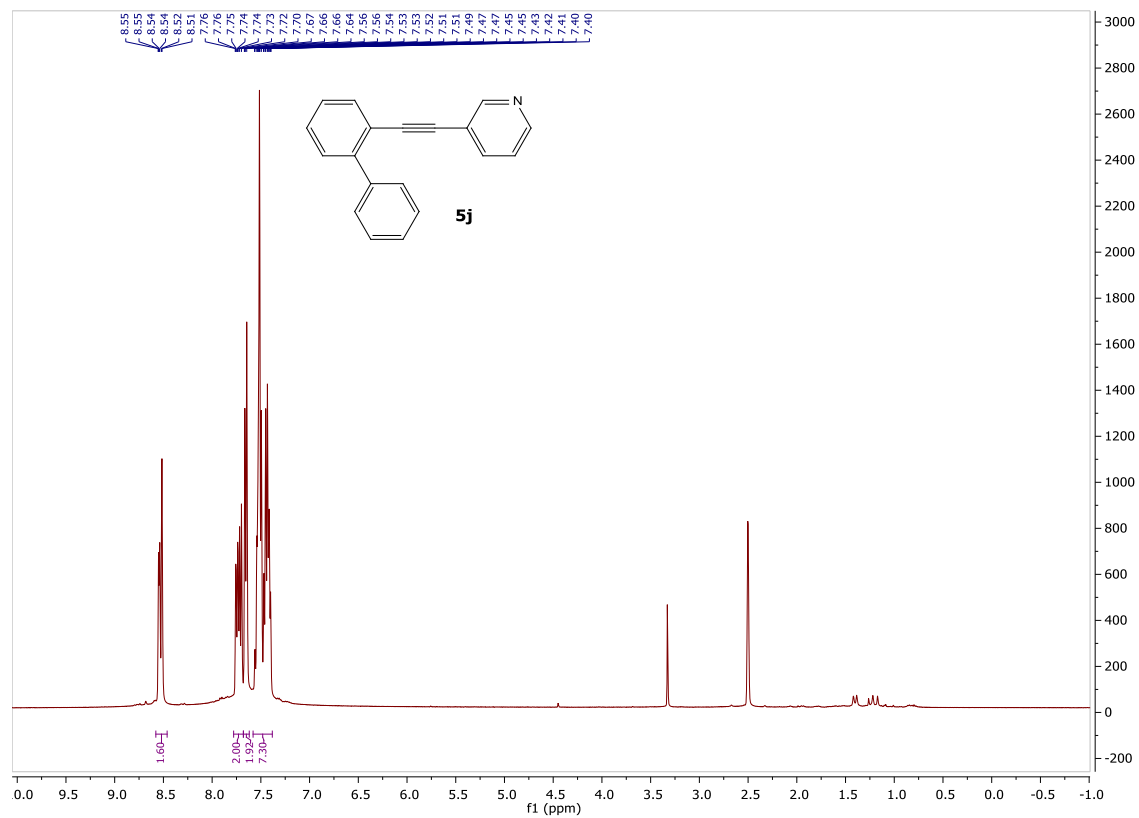

Figure S27:  $^{13}\text{C}$  NMR

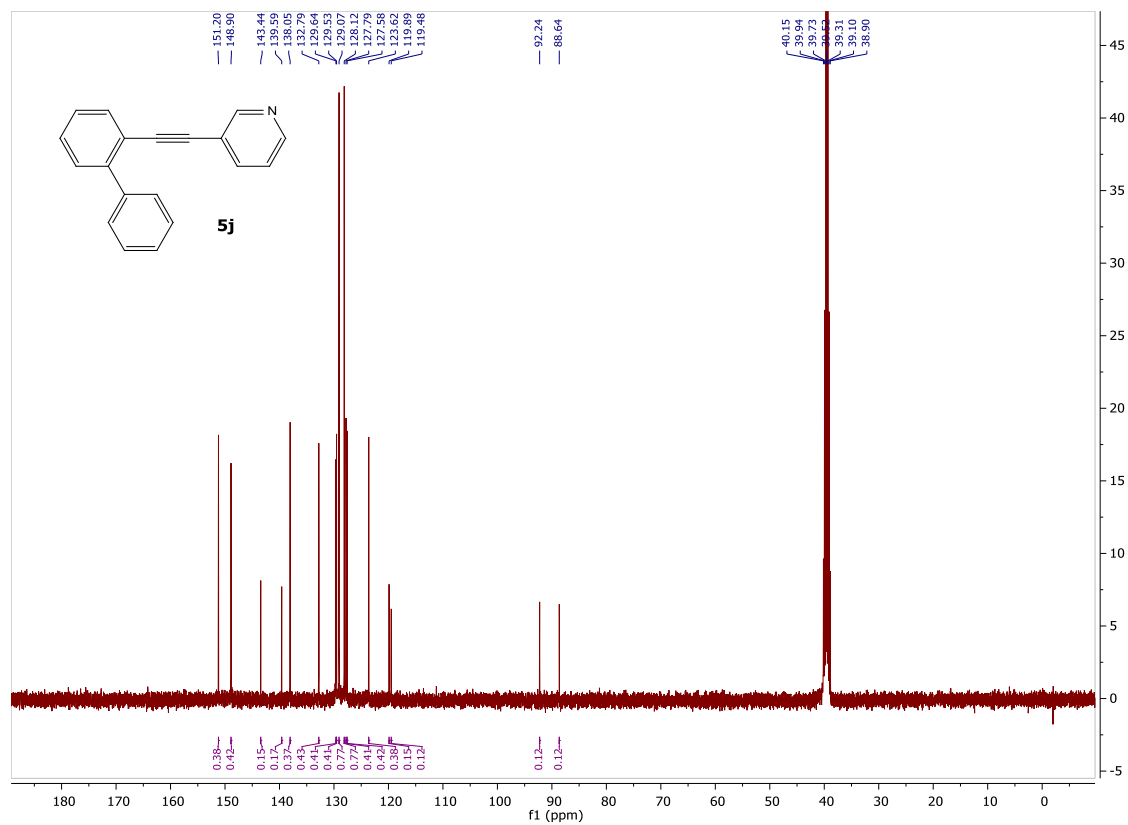

Figure S28:  $^1\text{H}$  NMR

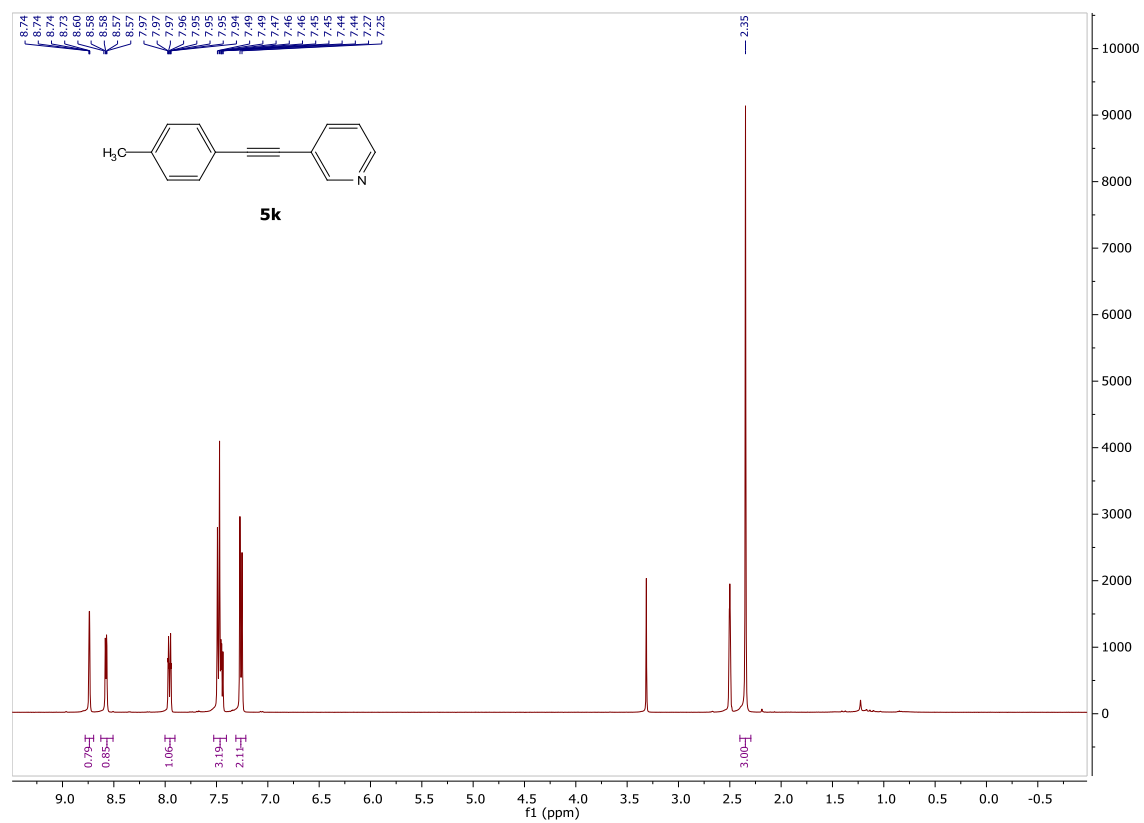

Figure S29:  $^{13}\text{C}$  NMR

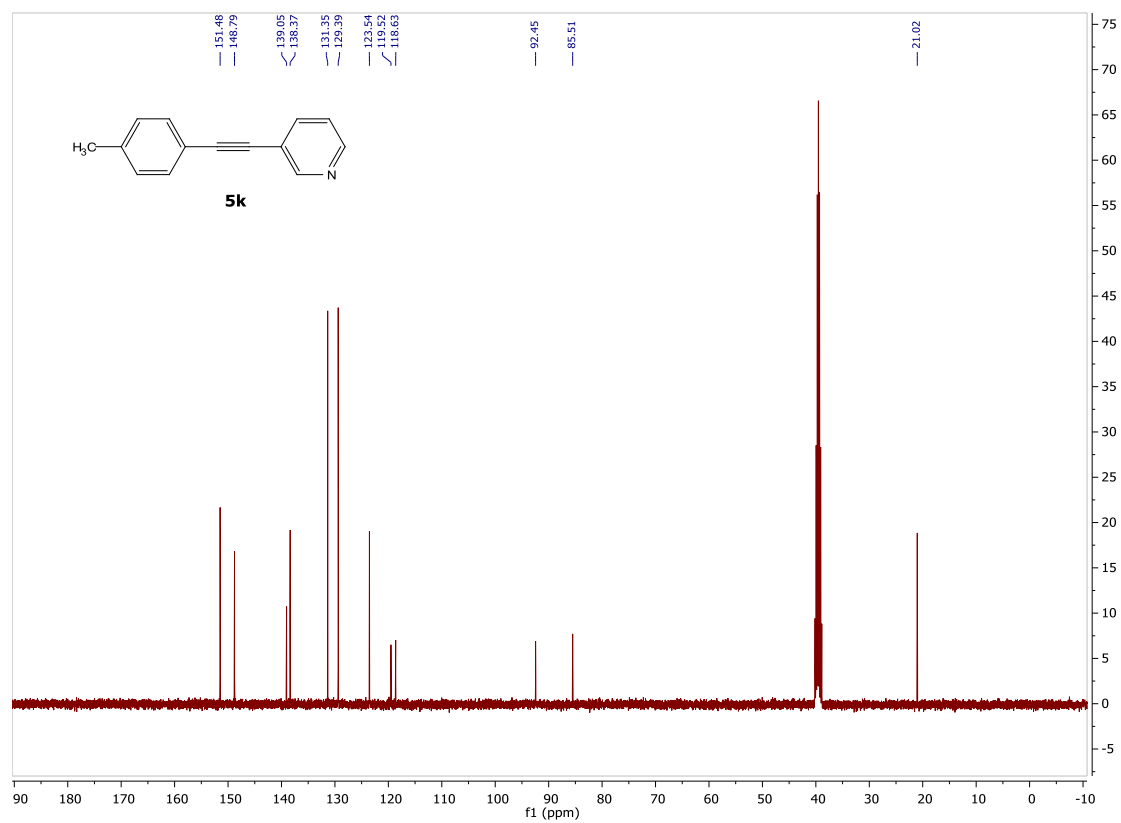

Figure S30: <sup>1</sup>H NMR

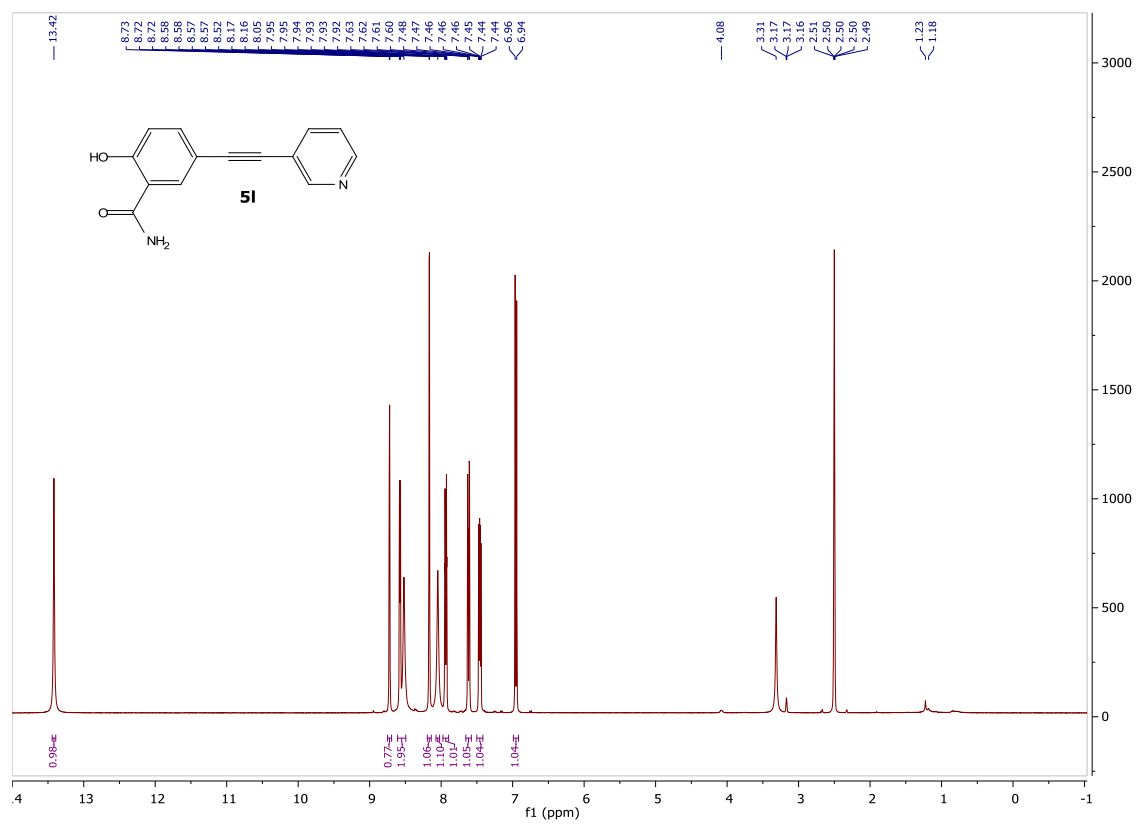

Figure S31:  $^{13}\text{C}$  NMR

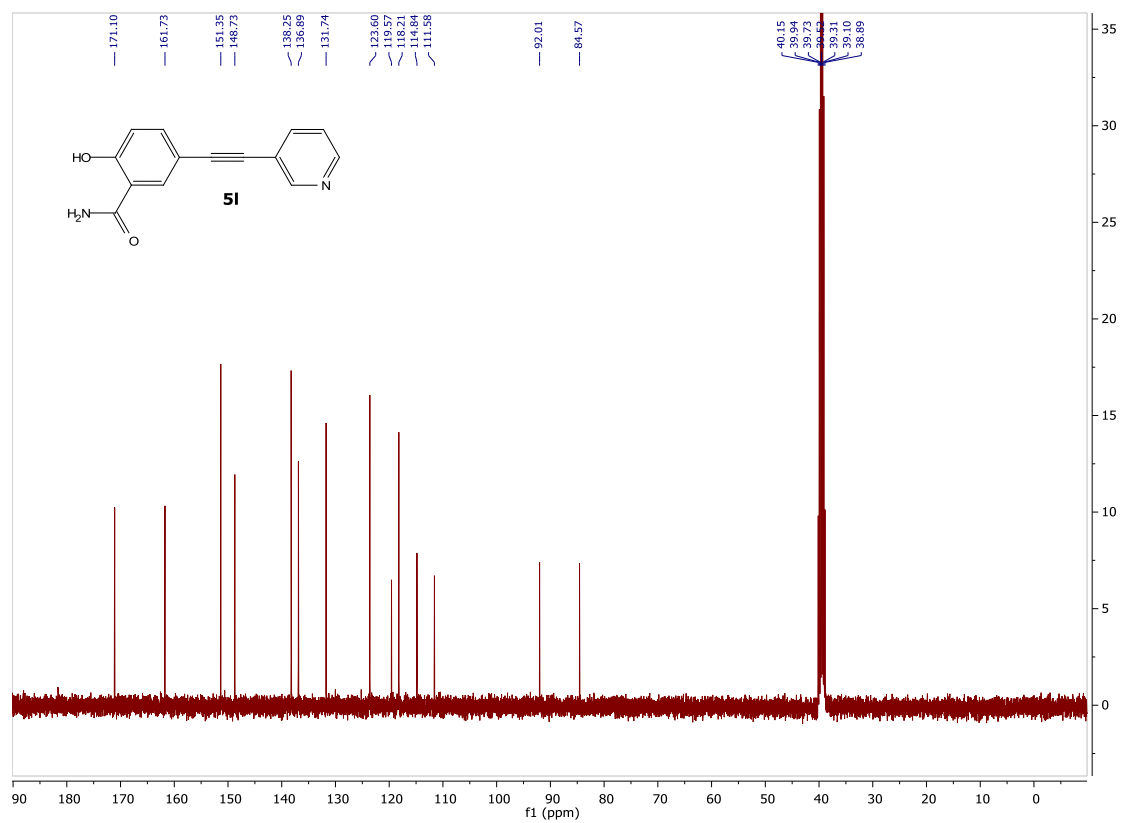

Figure S32:  $^1\text{H}$  NMR

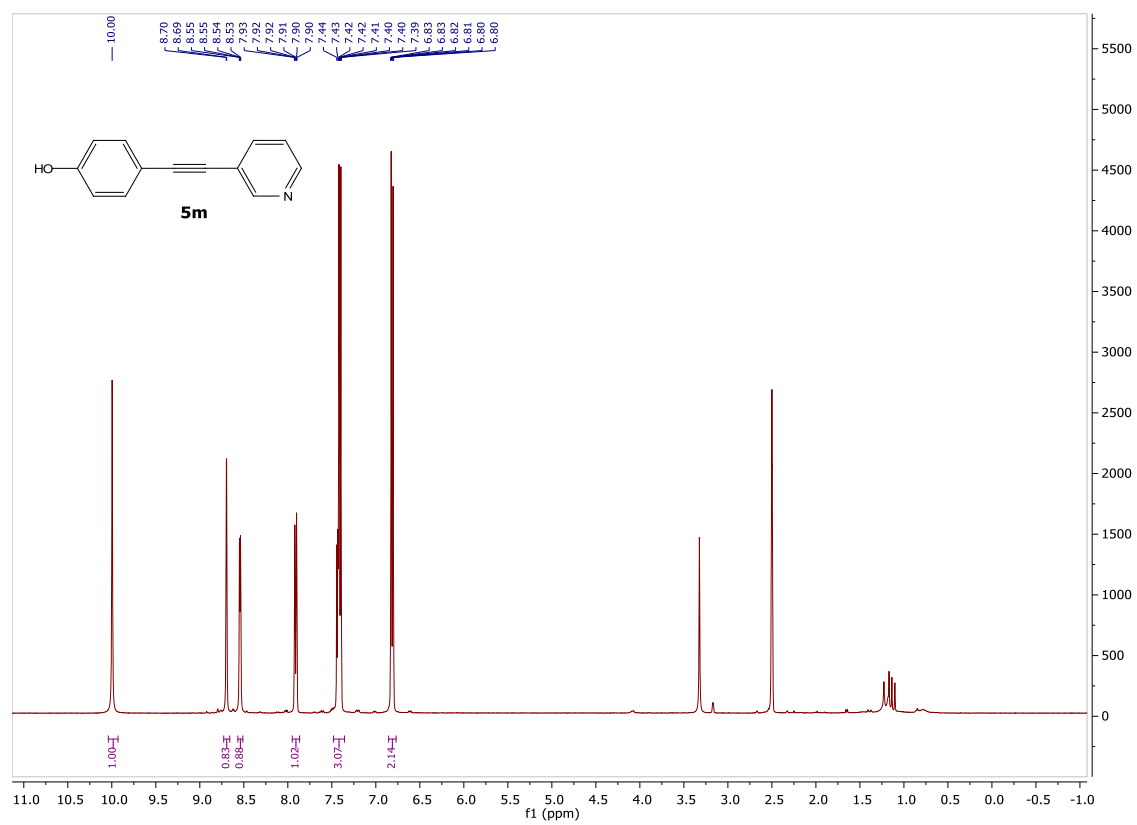



Figure S33:  $^{13}\text{C}$  NMR

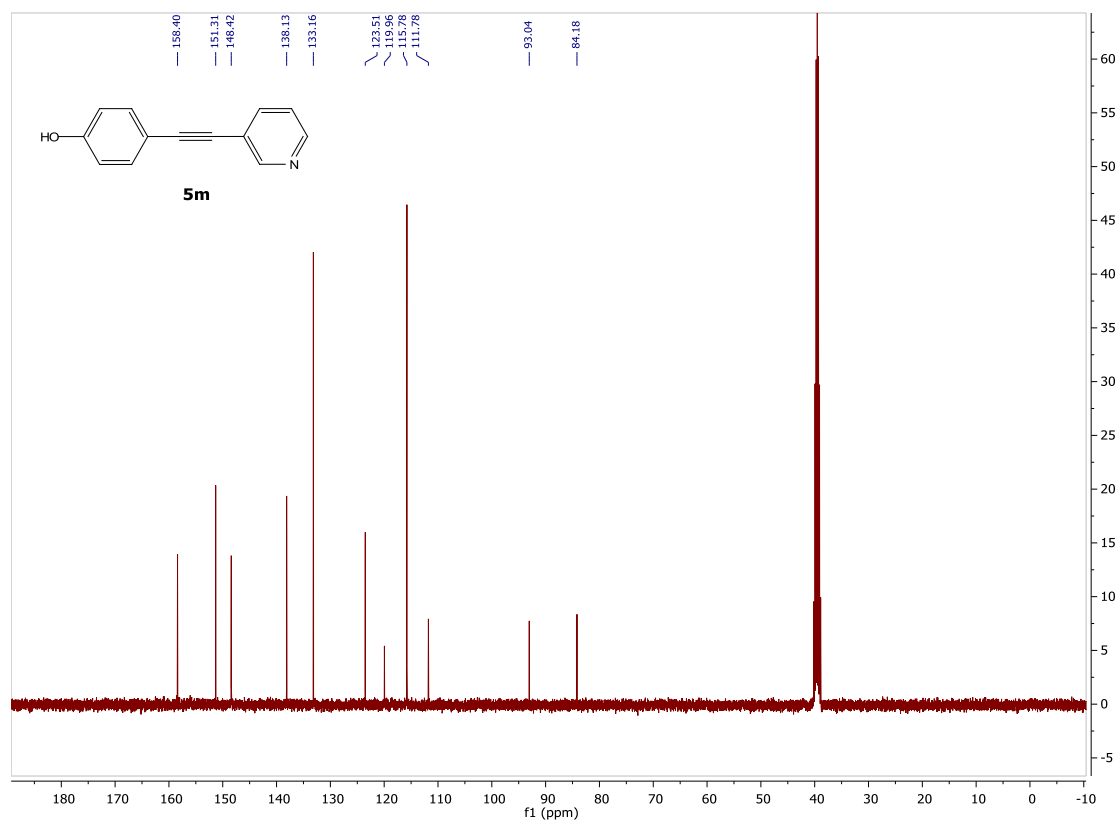

Figure S34:  $^1\text{H}$  NMR

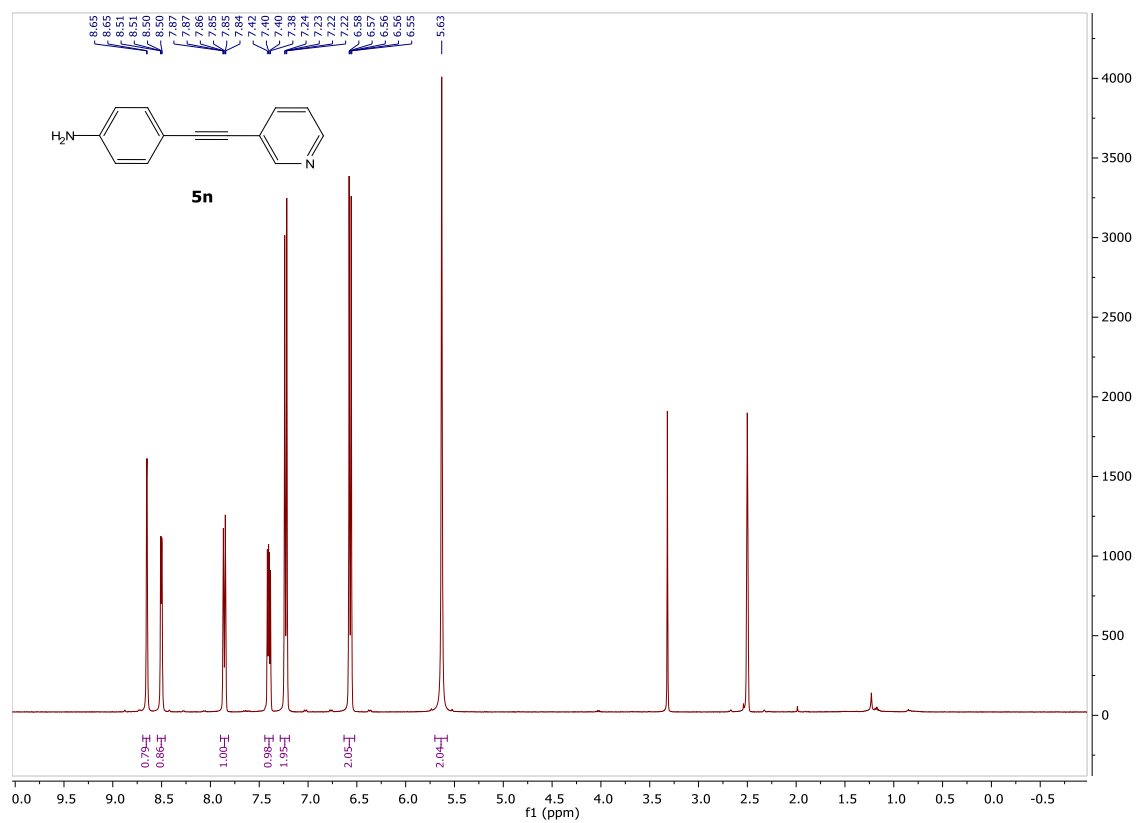

Figure S35:  $^{13}\text{C}$  NMR

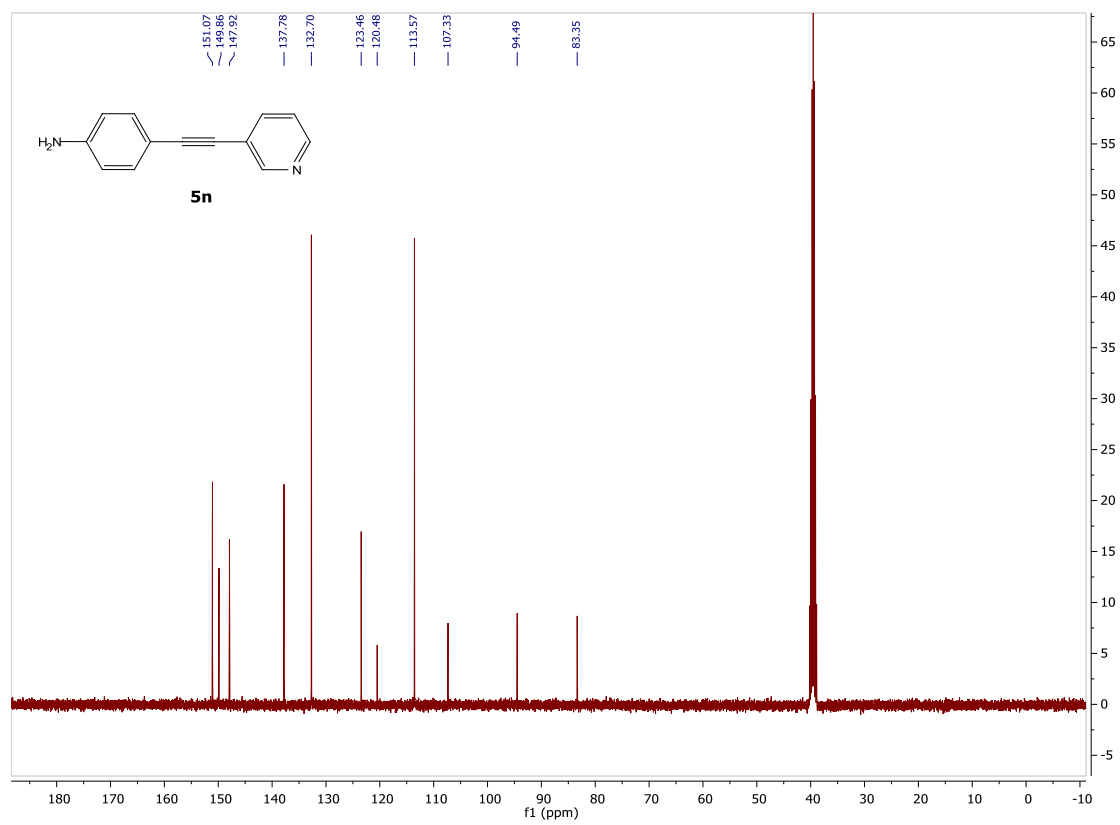

Figure S36:  $^1\text{H}$  NMR

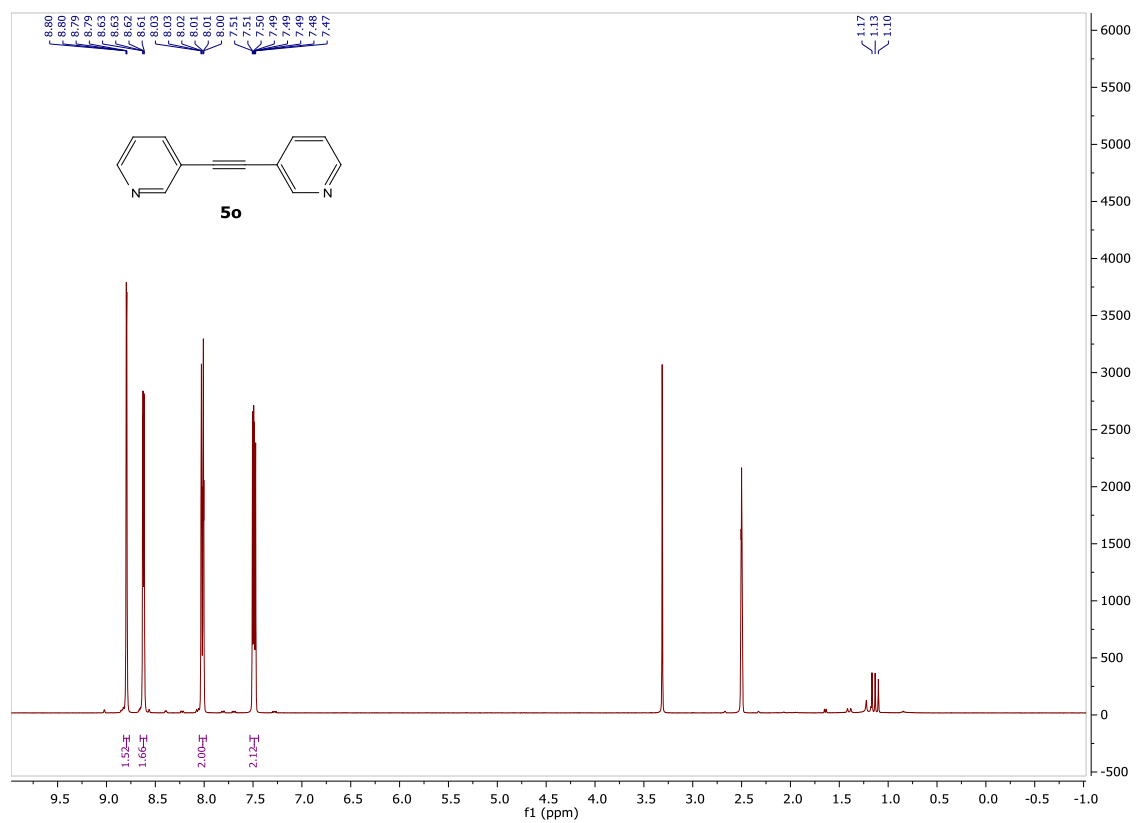

Figure S37:  $^{13}\text{C}$  NMR

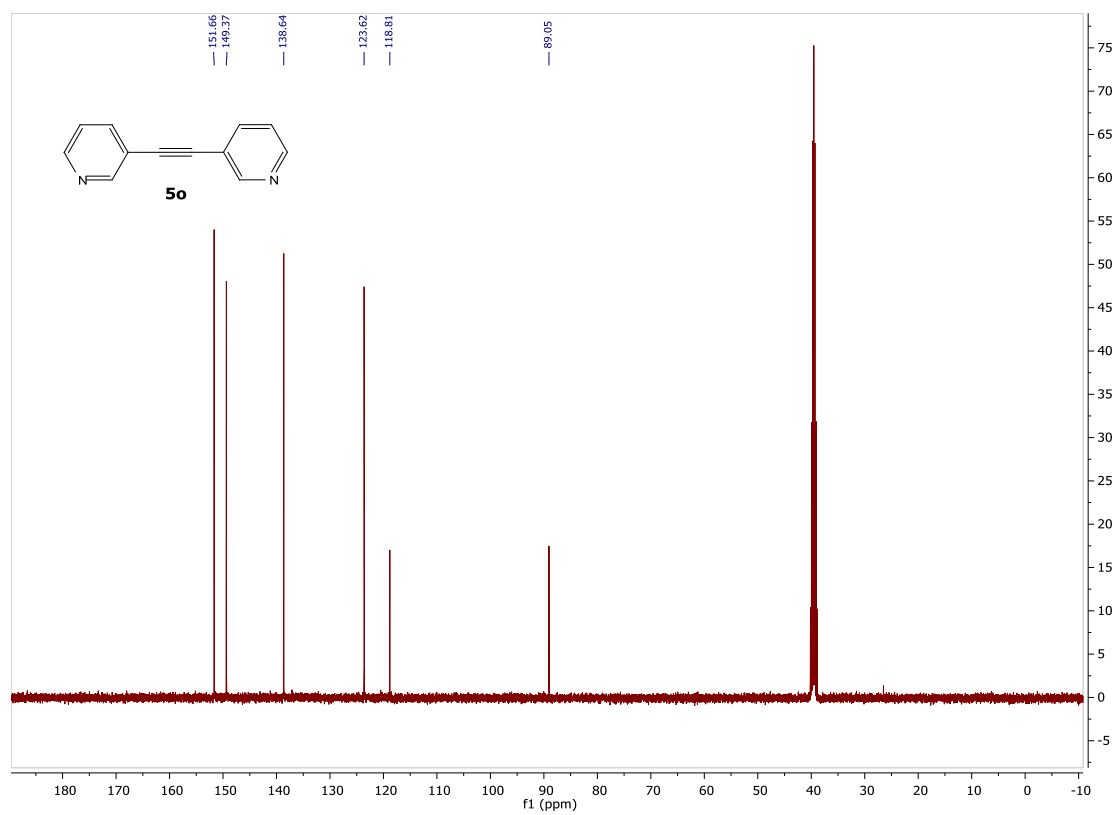

Figure S38:  $^1\text{H}$  NMR

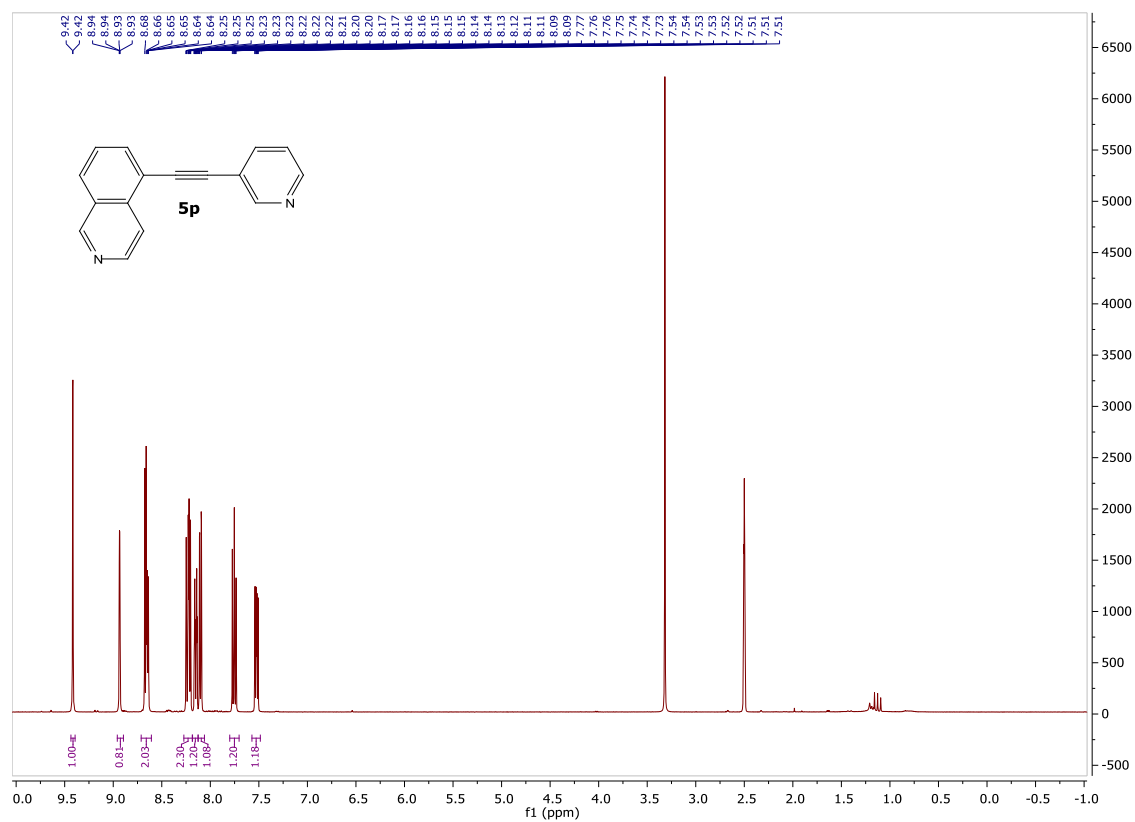

Figure S39:  $^{13}\text{C}$  NMR

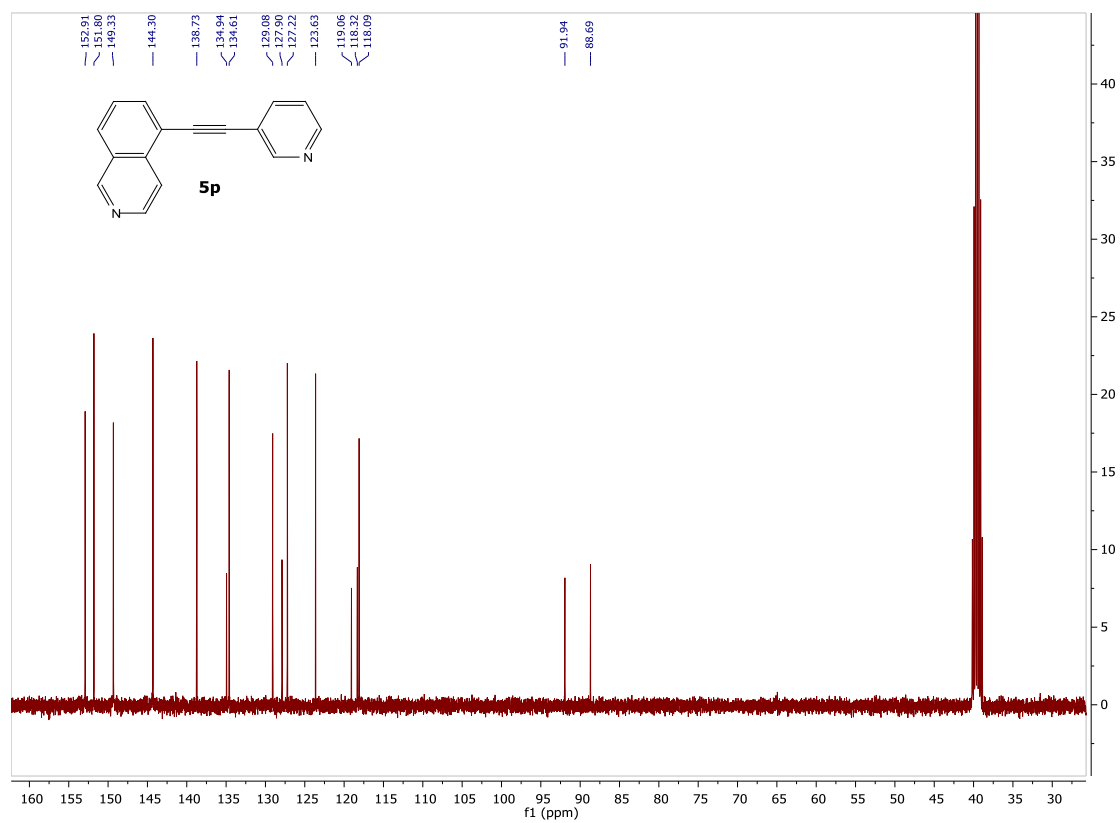

Figure S40: <sup>1</sup>H NMR

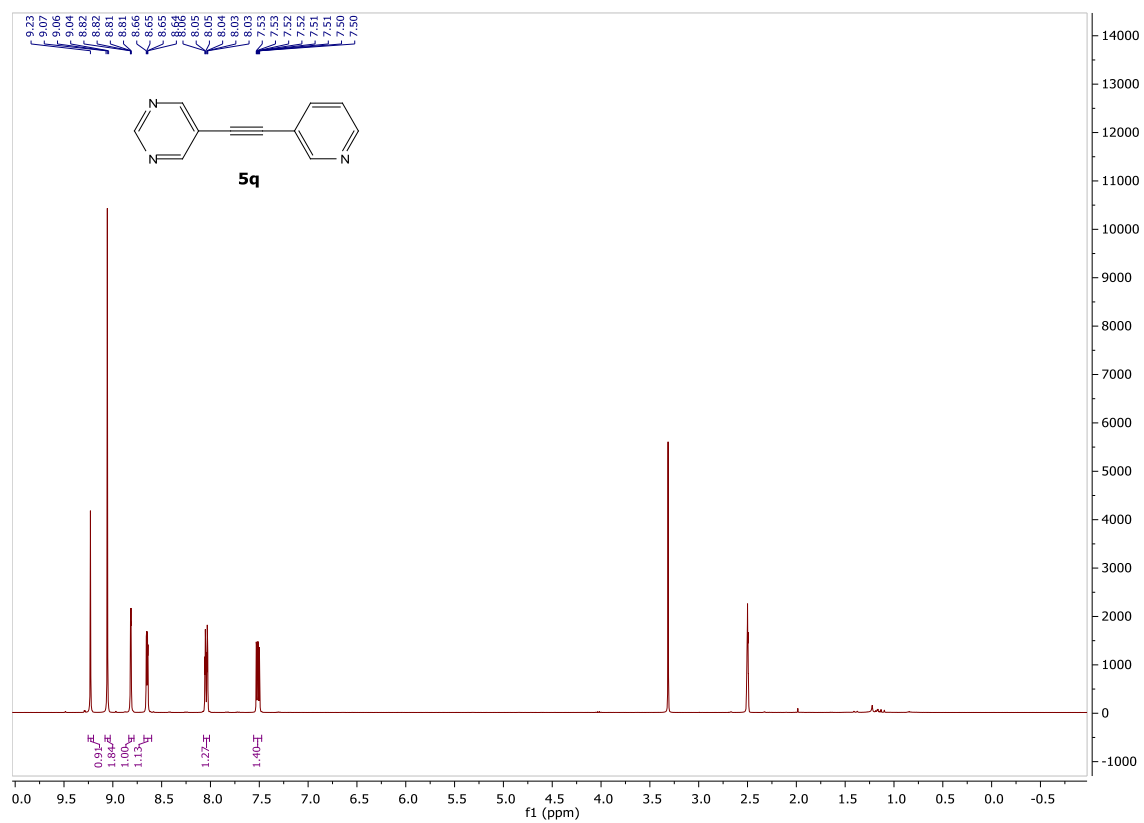



Figure S41:  $^{13}\text{C}$  NMR

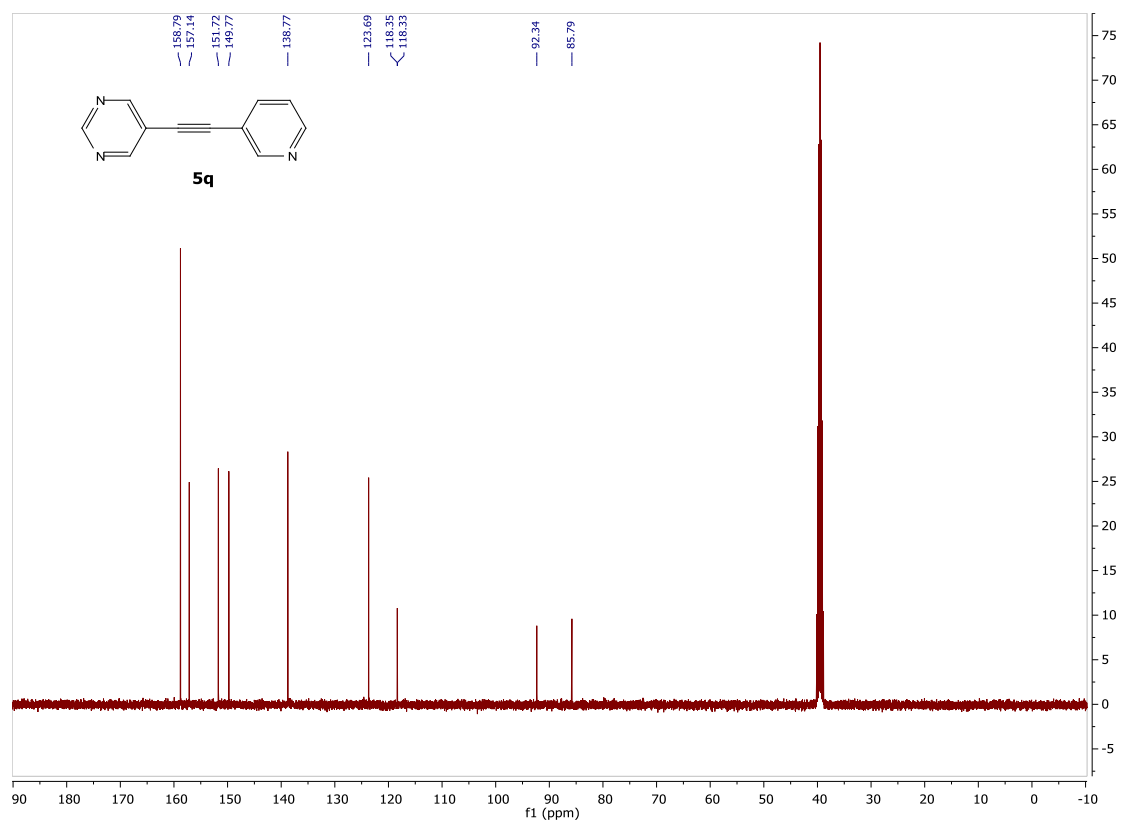

Figure S42:  $^1\text{H}$  NMR

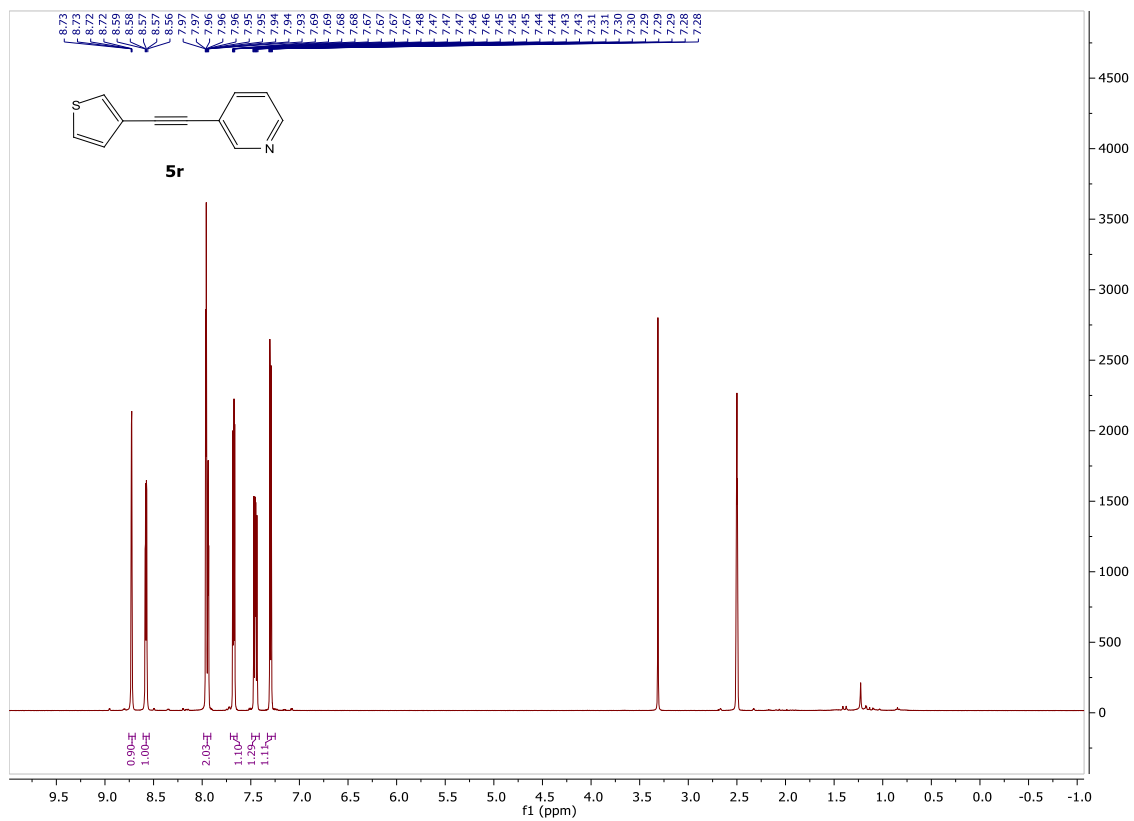

Figure S43:  $^{13}\text{C}$  NMR

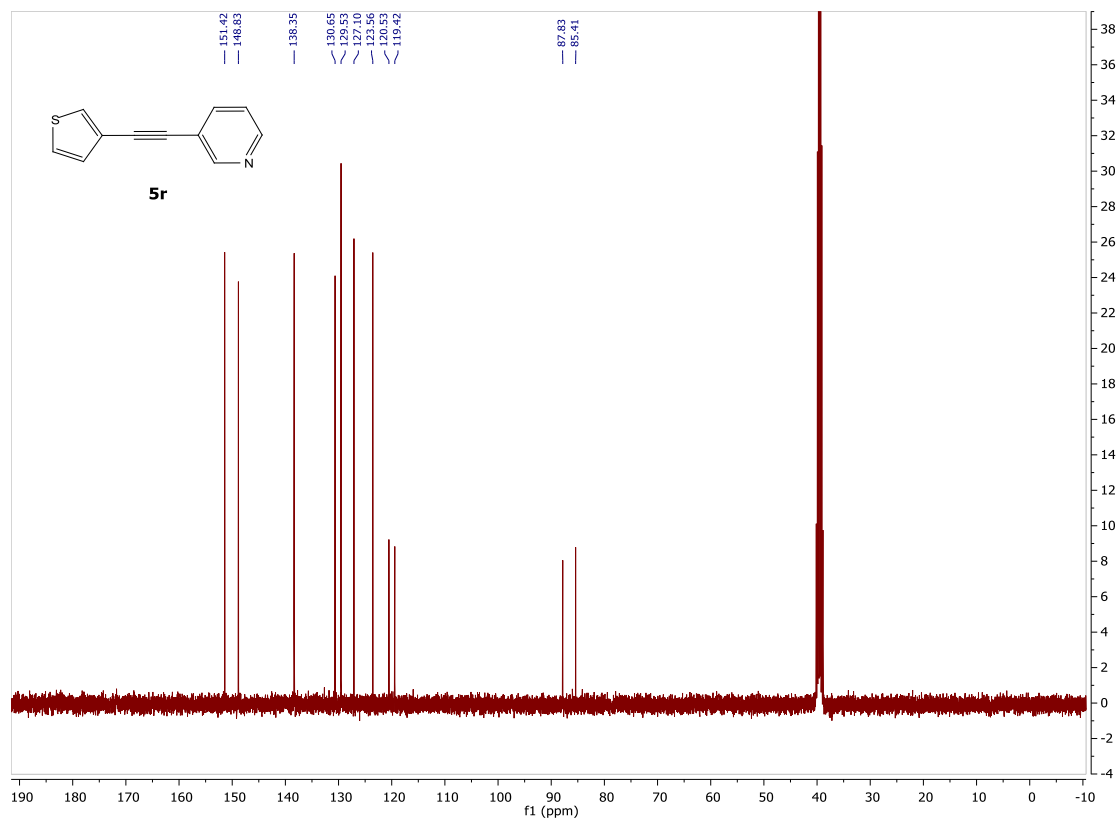

Figure S44: <sup>1</sup>H NMR

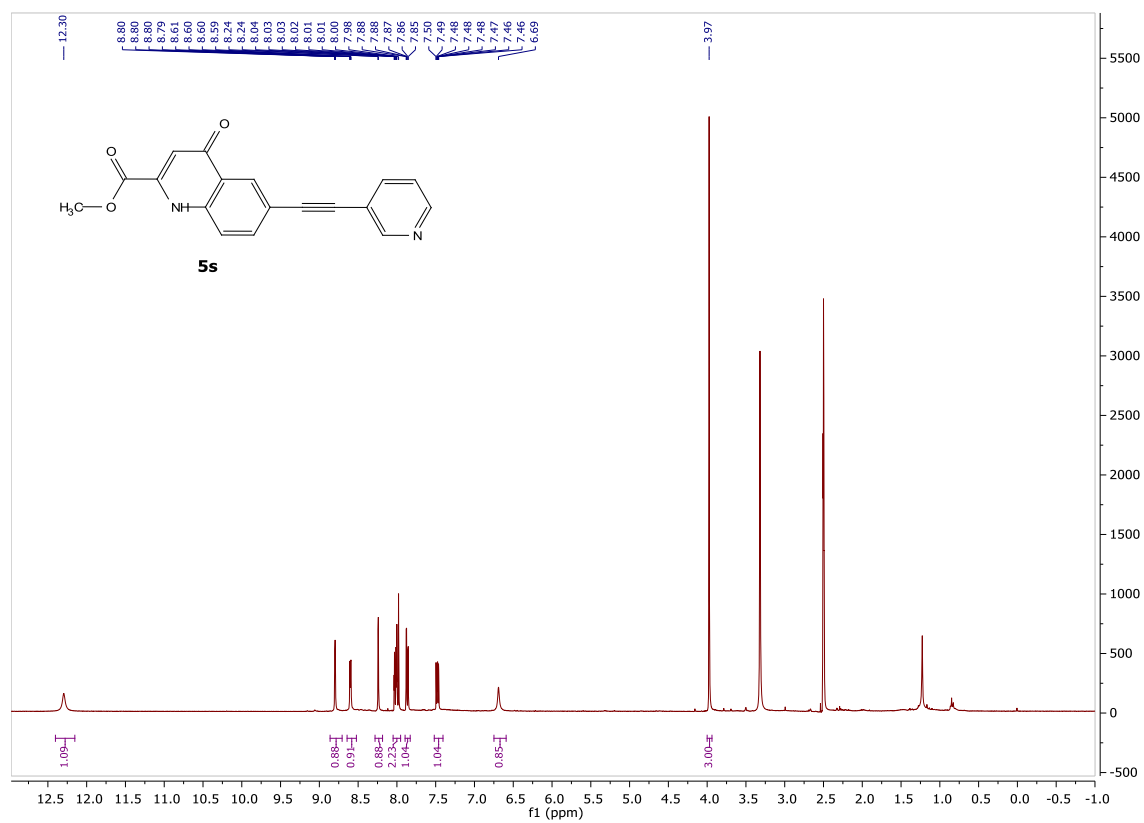

Figure S45:  $^{13}\text{C}$  NMR

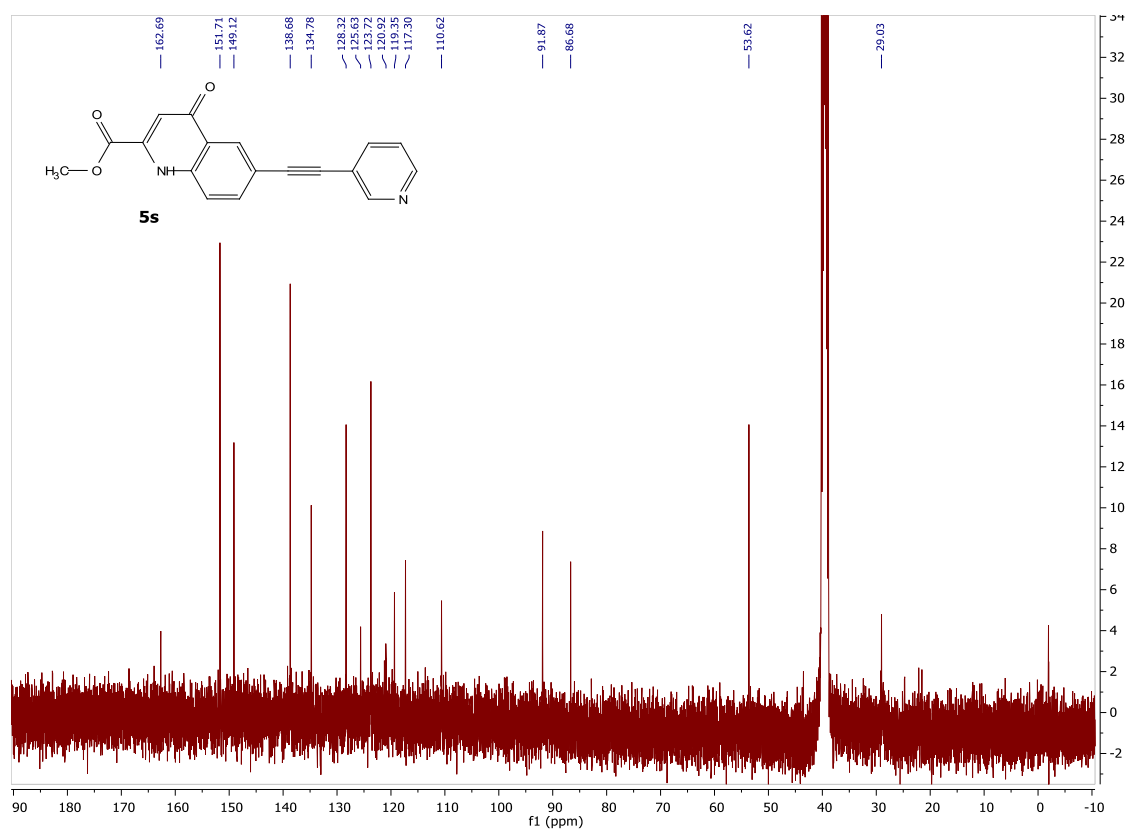

\*weak intensity due to insolubility

Figure S46: <sup>1</sup>H NMR

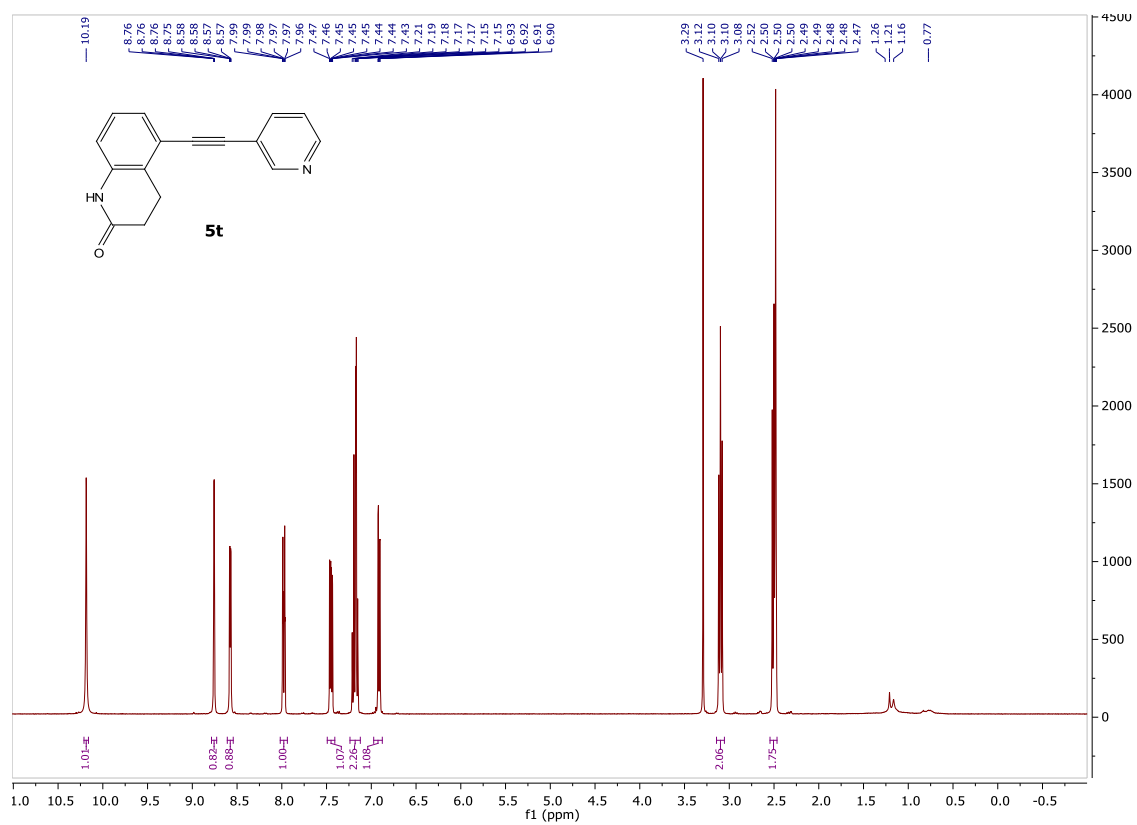

Figure S47:  $^{13}\text{C}$  NMR

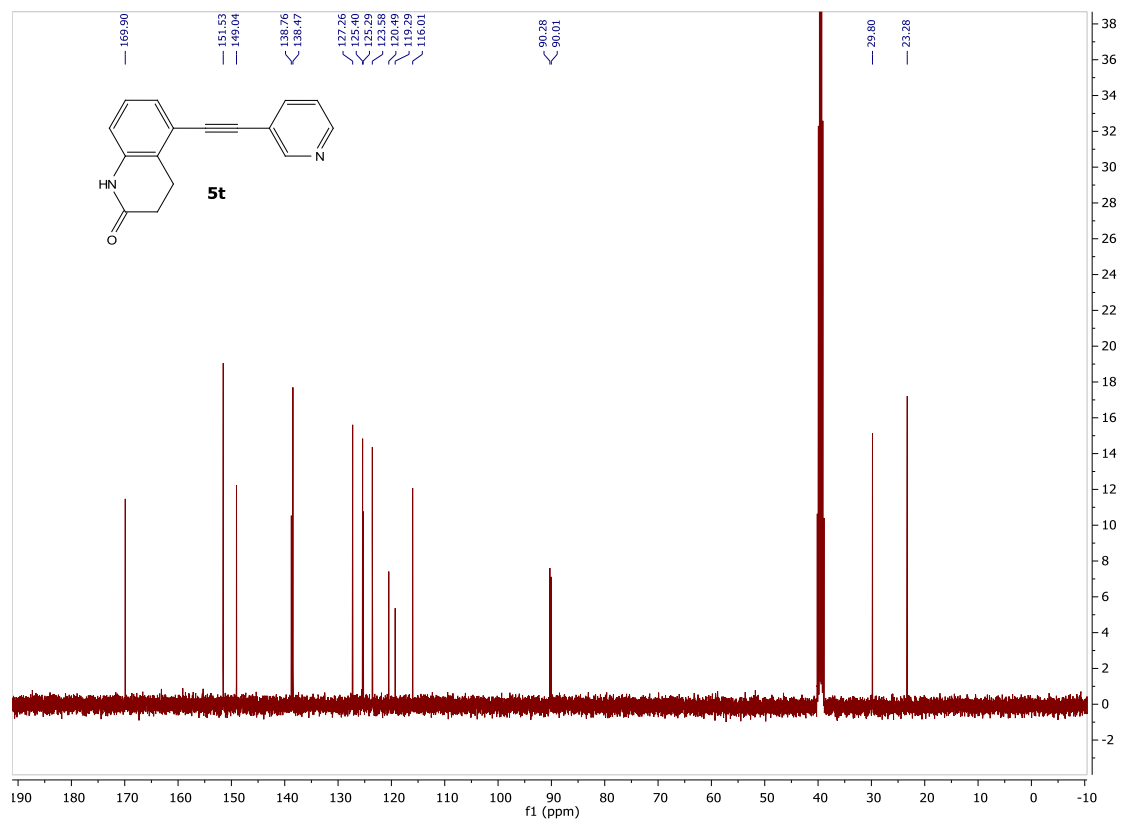

Figure S48:  $^1\text{H}$  NMR

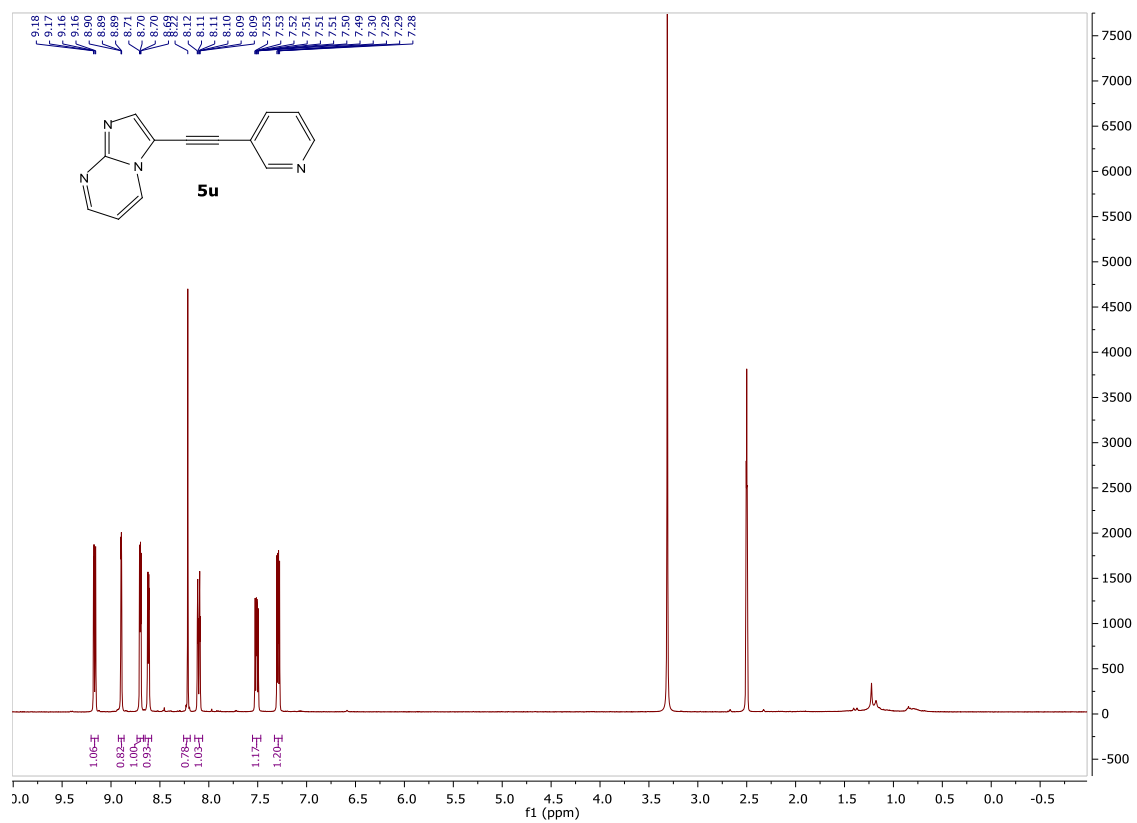



Figure S49:  $^{13}\text{C}$  NMR

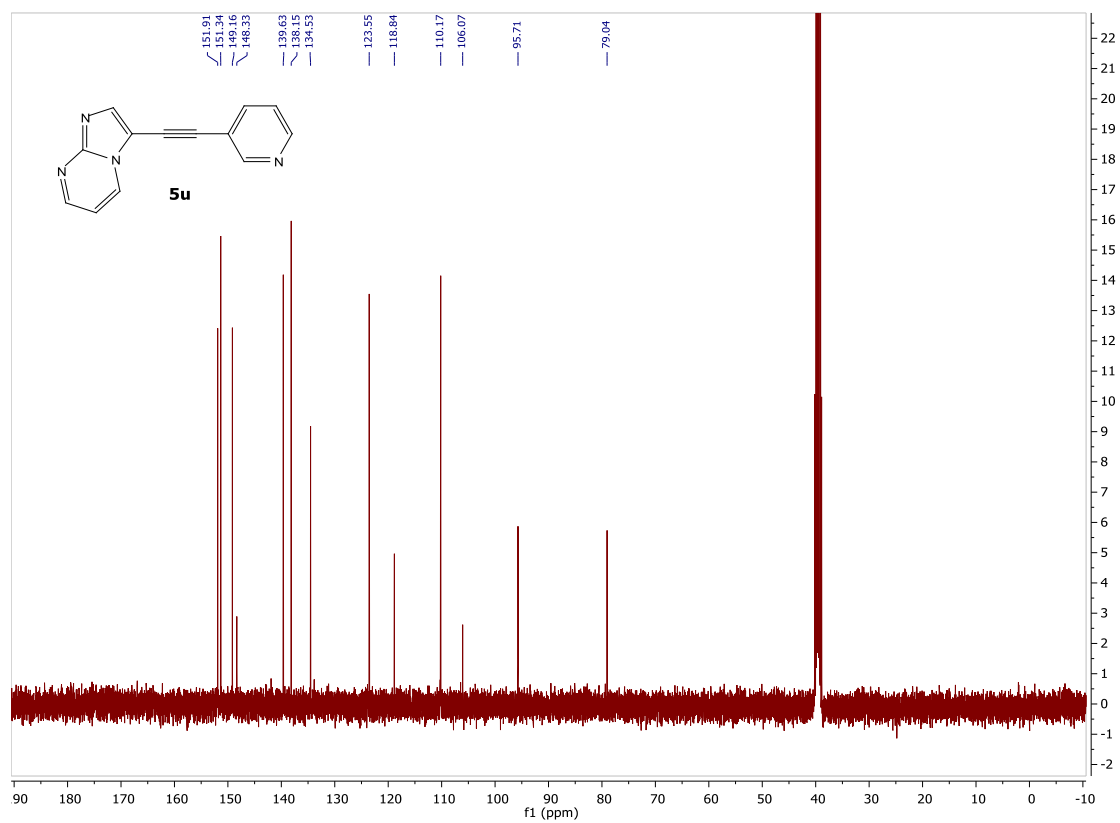

Figure S50:  $^1\text{H}$  NMR

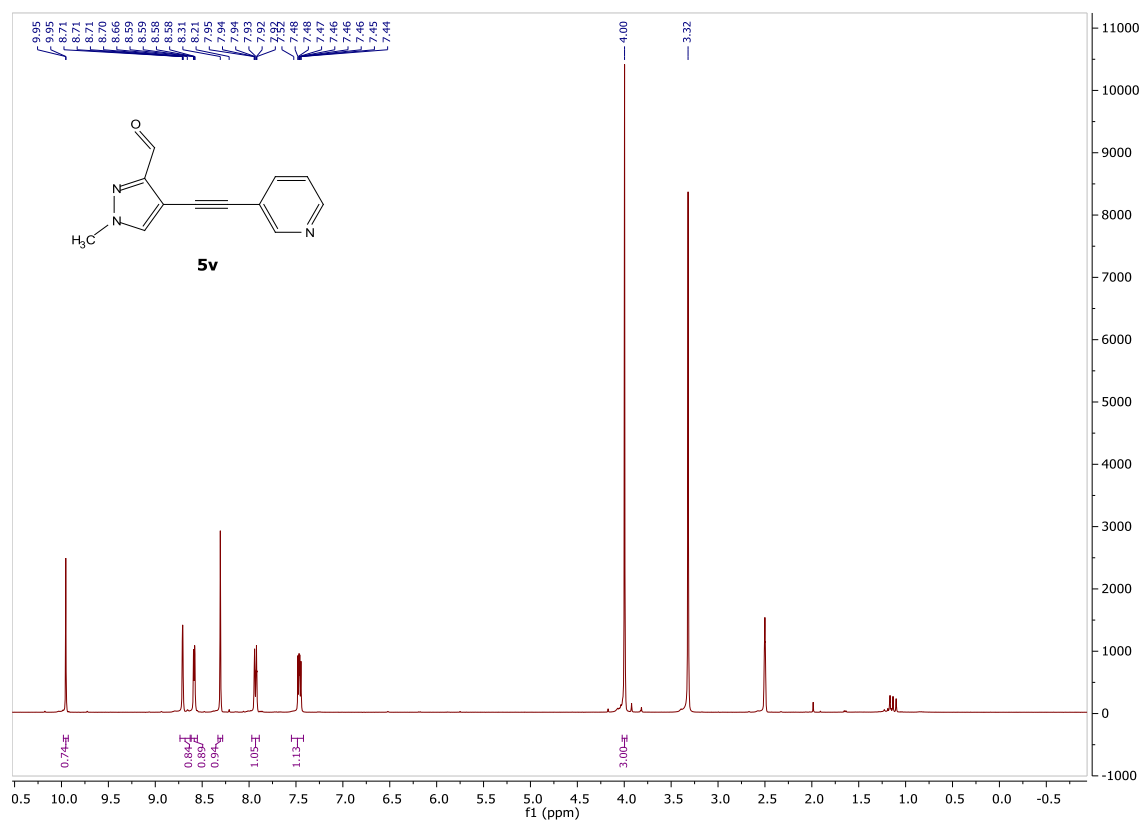

Figure S51:  $^{13}\text{C}$  NMR

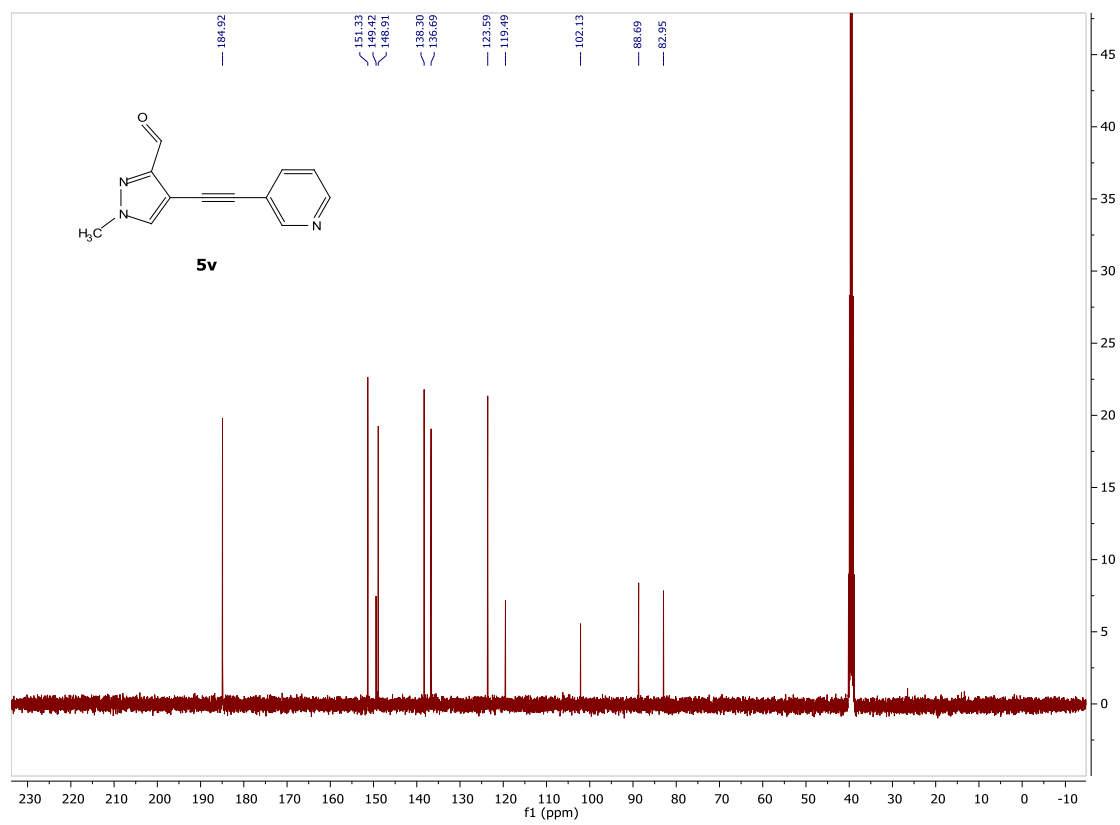

Figure S52:  $^1\text{H}$  NMR

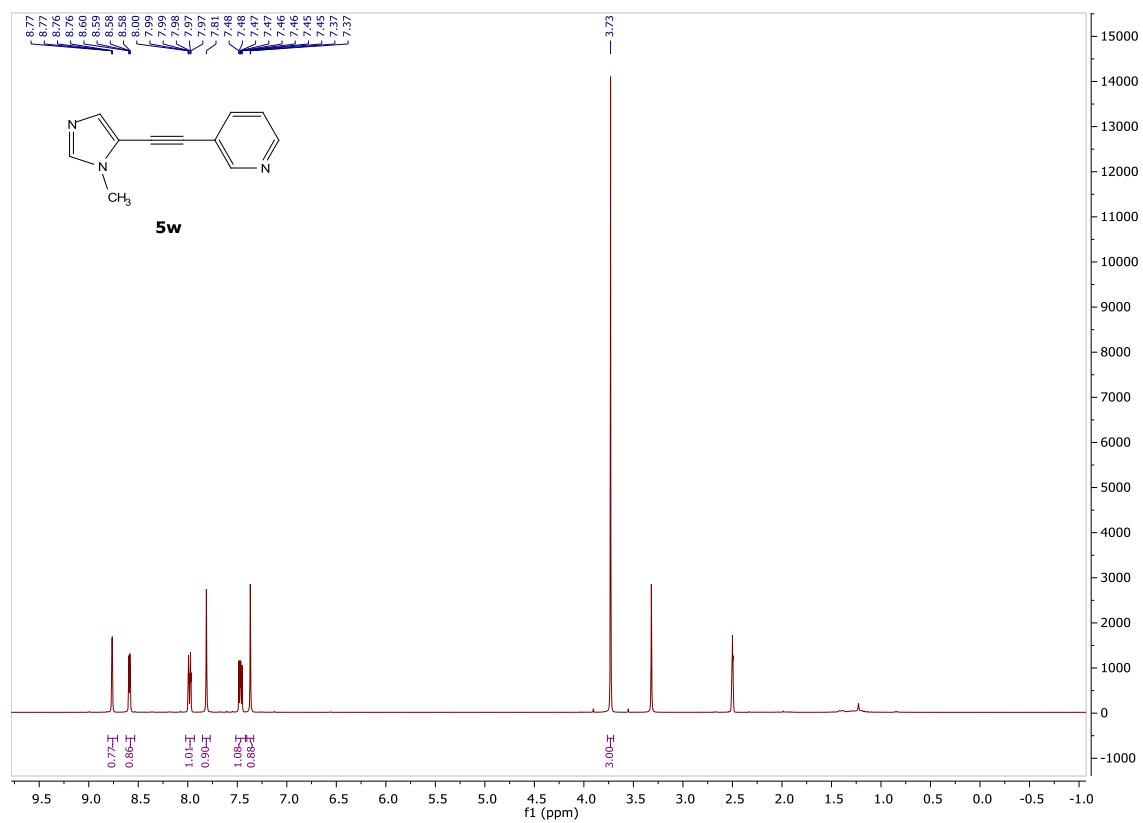

Figure S53:  $^{13}\text{C}$  NMR

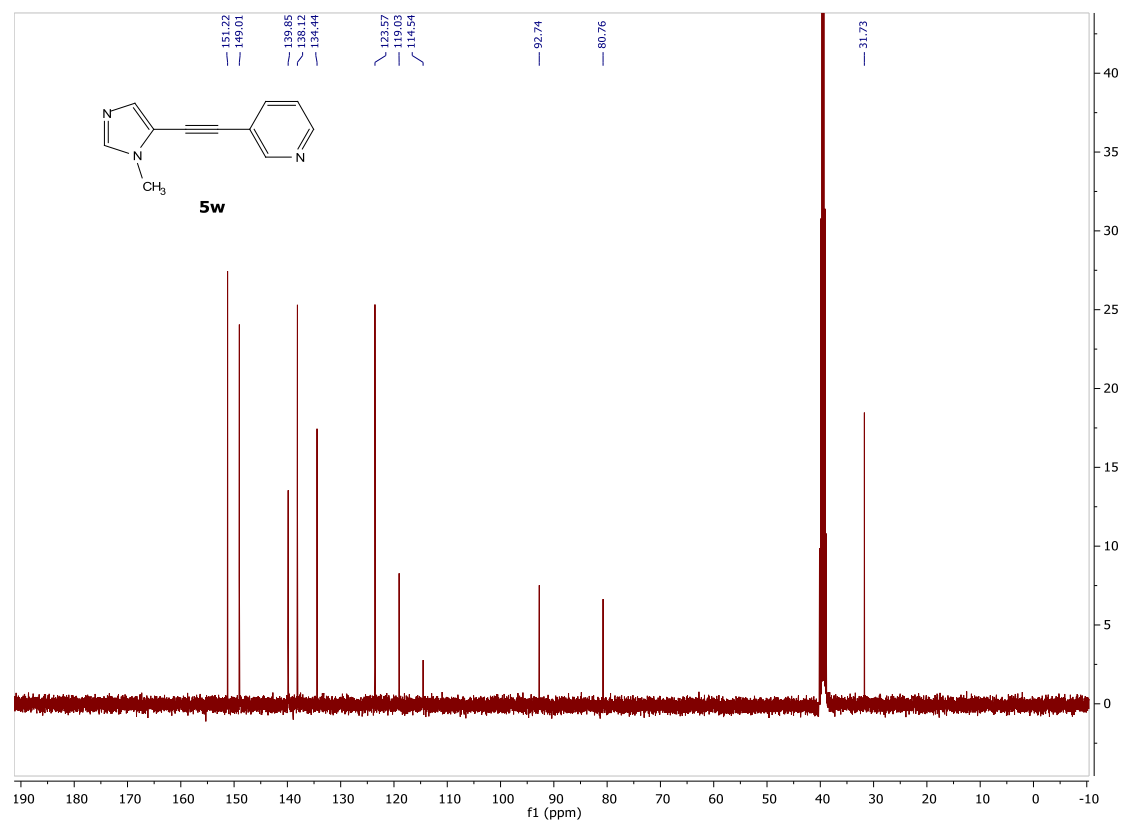

Figure S54:  $^1\text{H}$  NMR

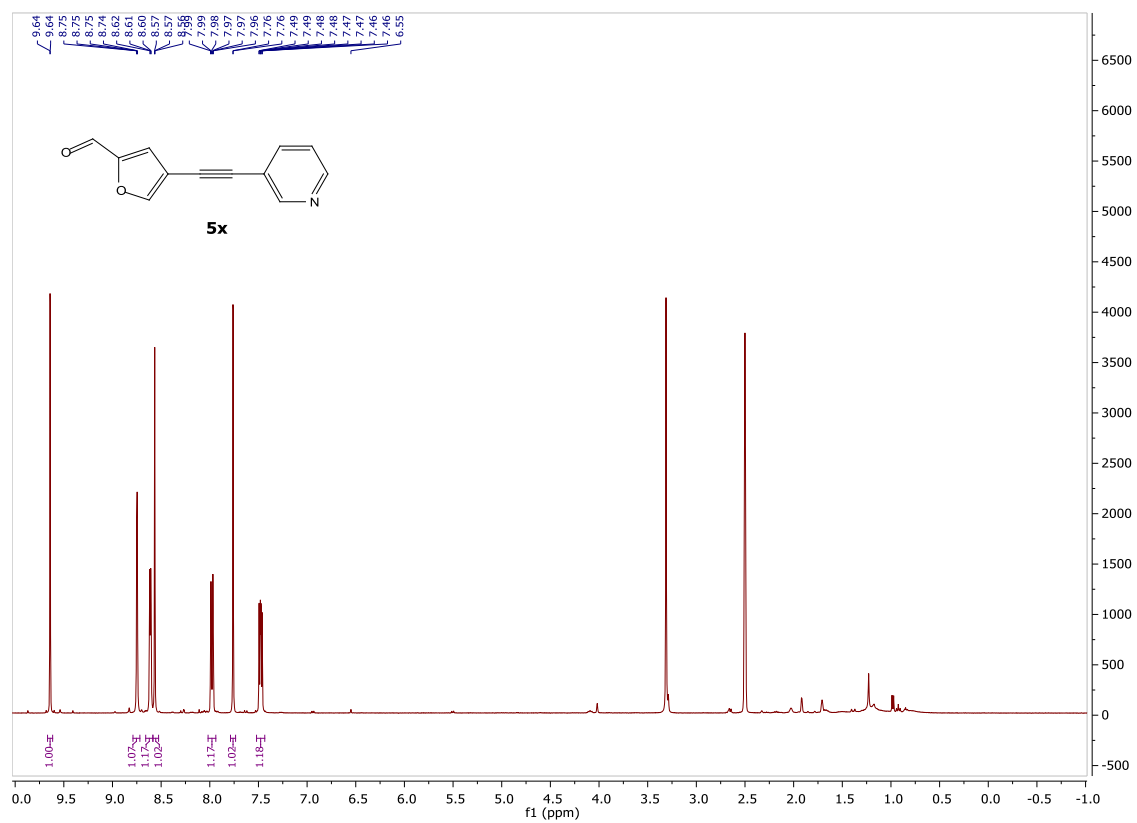

Figure S55:  $^{13}\text{C}$  NMR

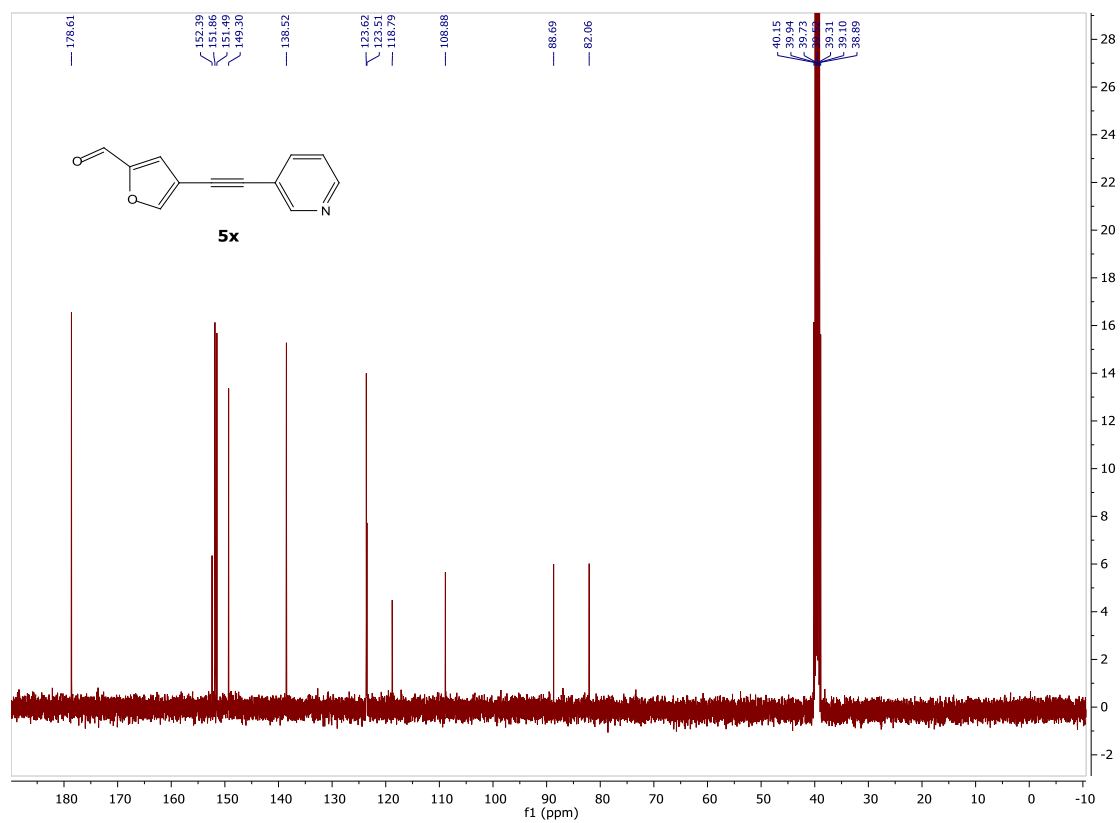

Figure S56:  $^1\text{H}$  NMR

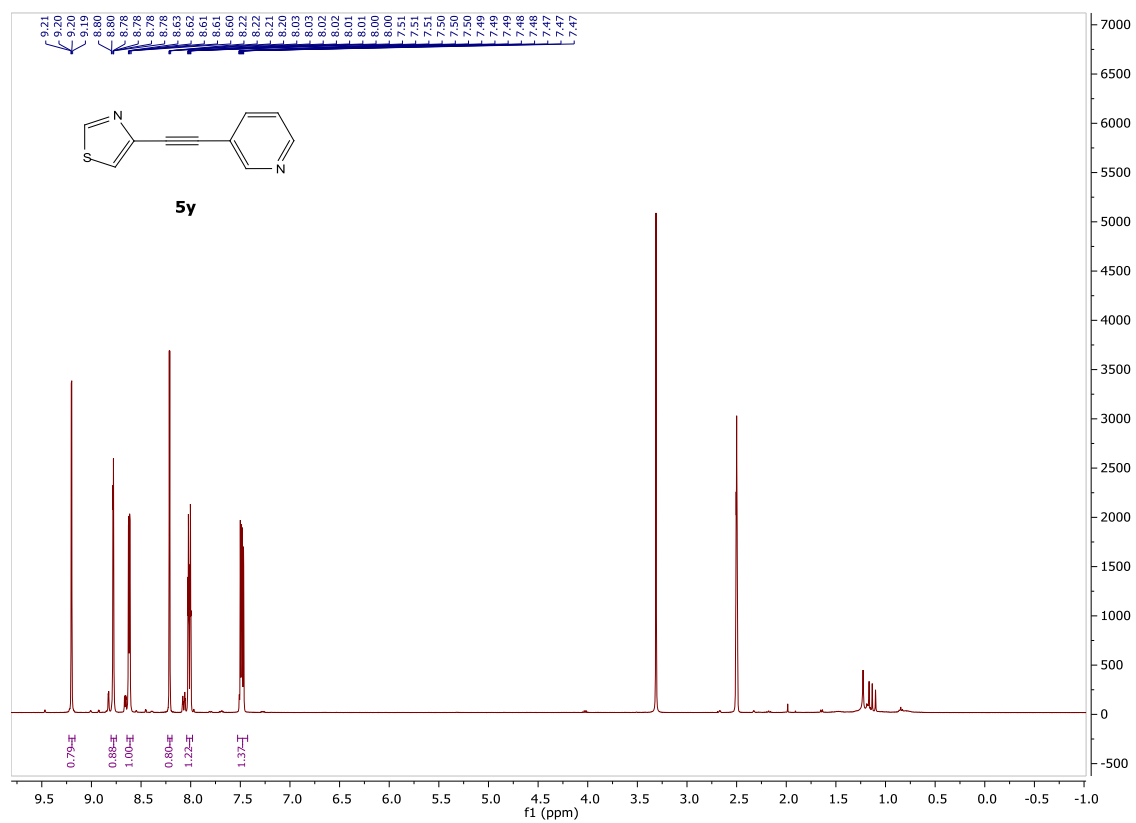



Figure S57:  $^{13}\text{C}$  NMR

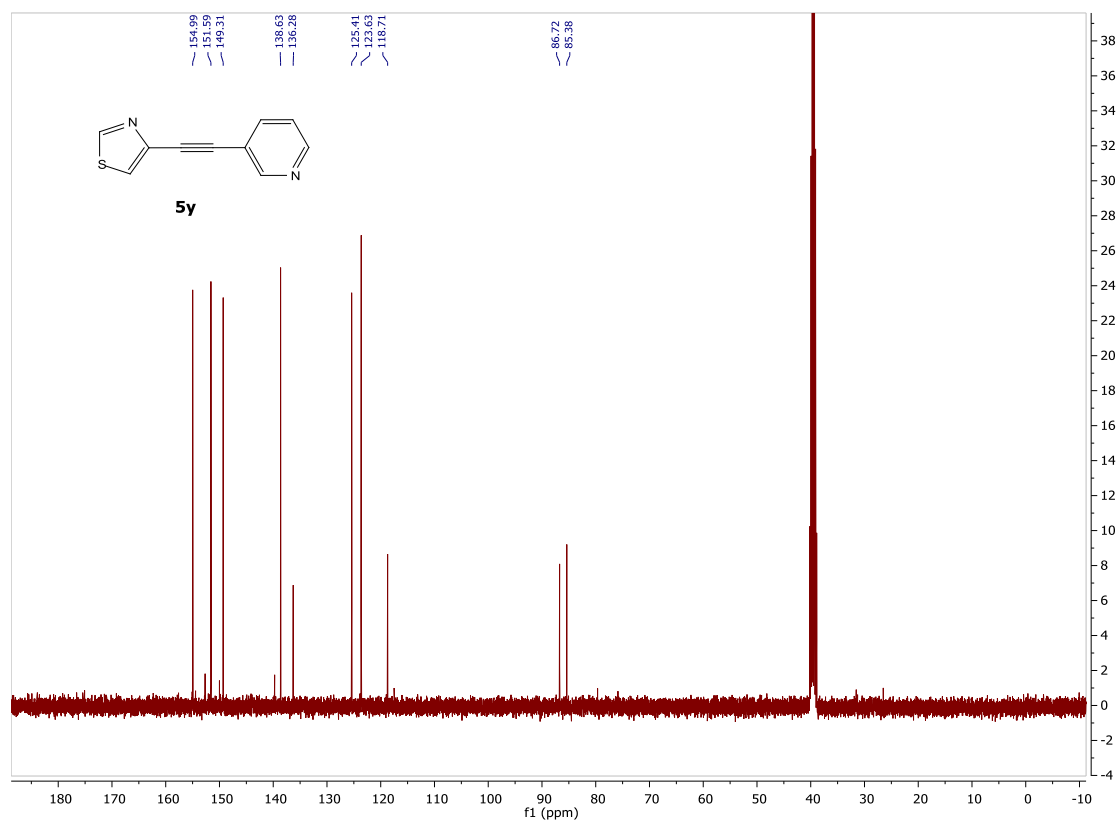

Figure S58:  $^1\text{H}$  NMR

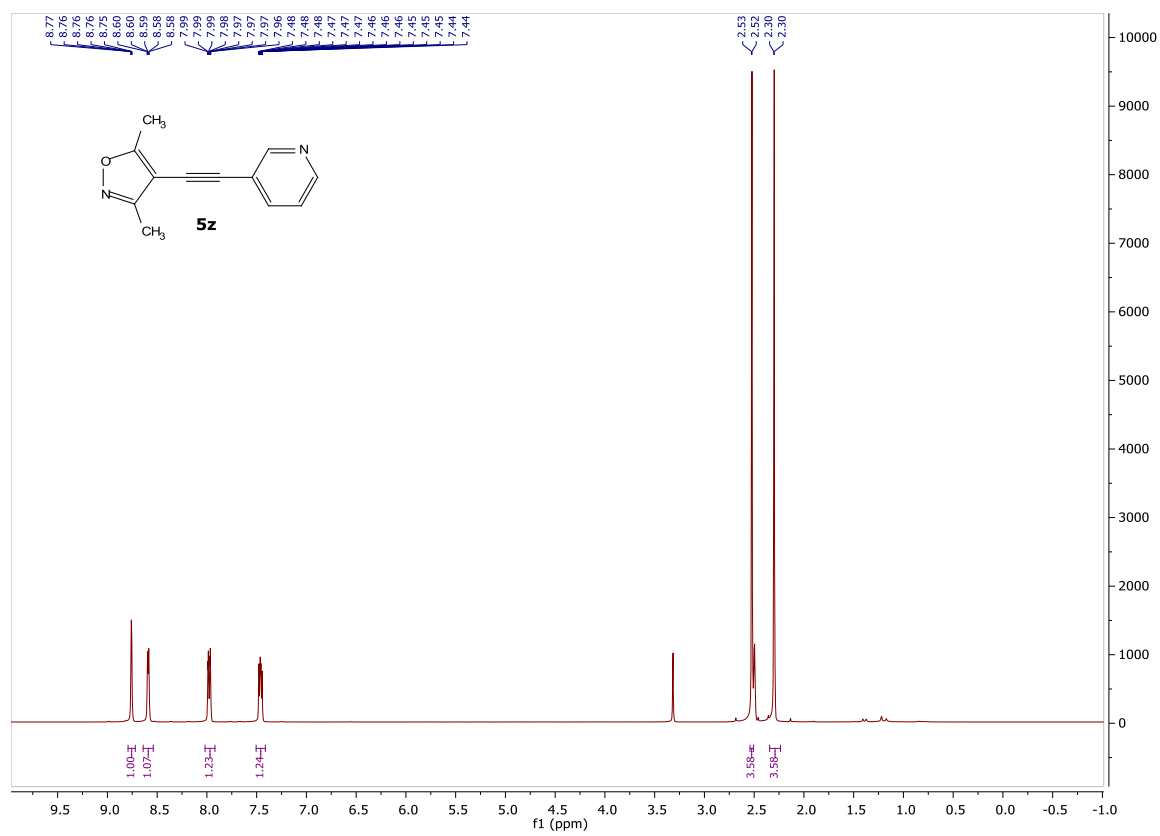

Figure S59:  $^{13}\text{C}$  NMR

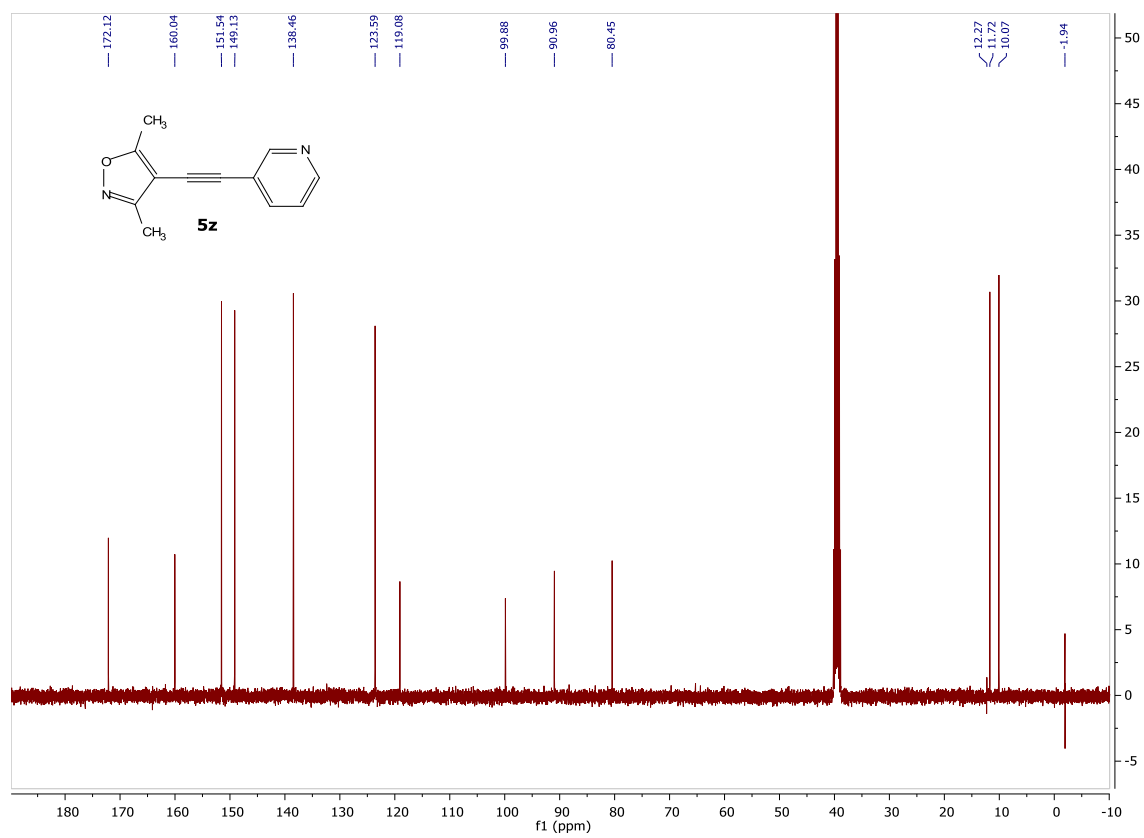

Figure S60:  $^1\text{H}$  NMR

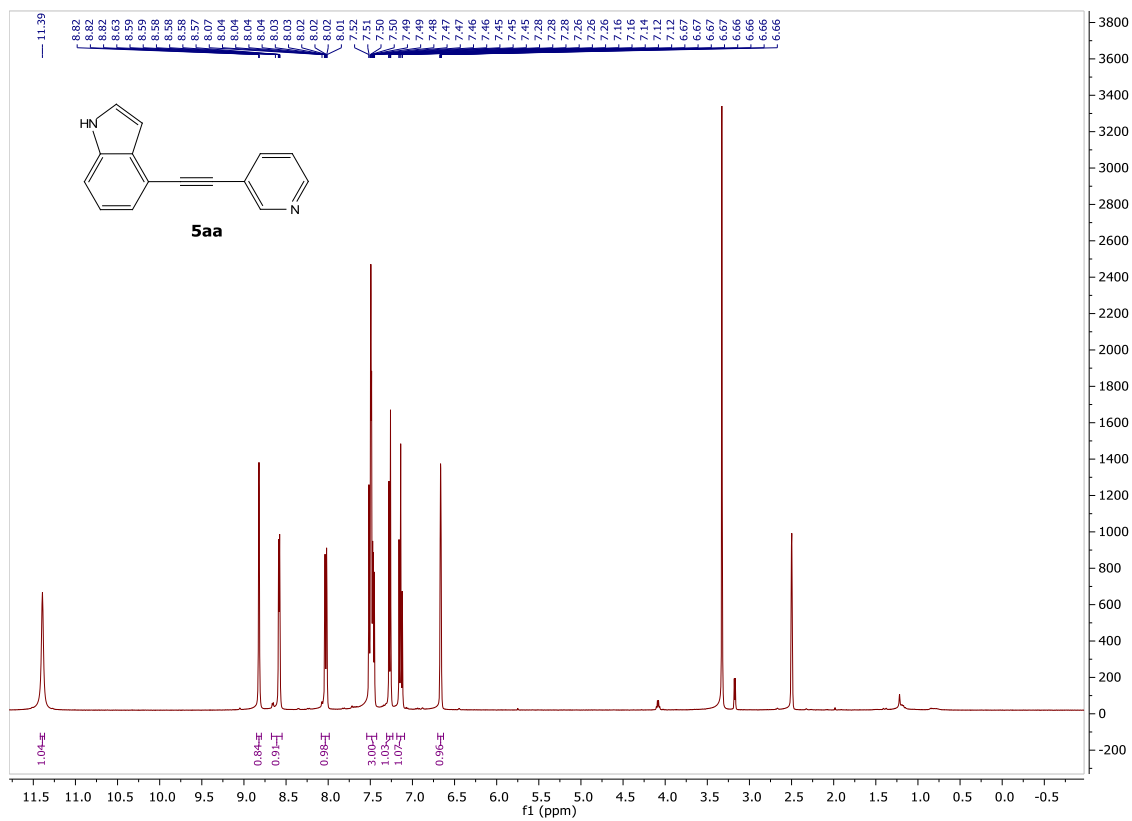

Figure S61:  $^{13}\text{C}$  NMR

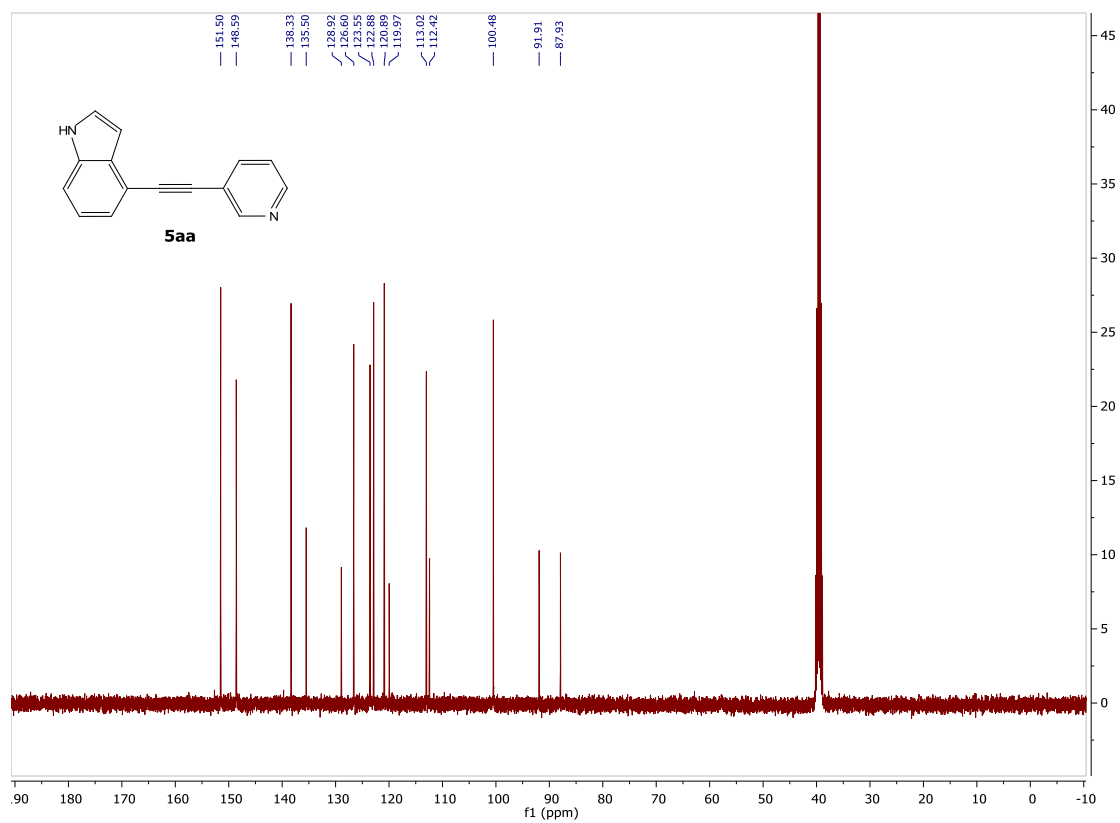

Figure S62:  $^1\text{H}$  NMR

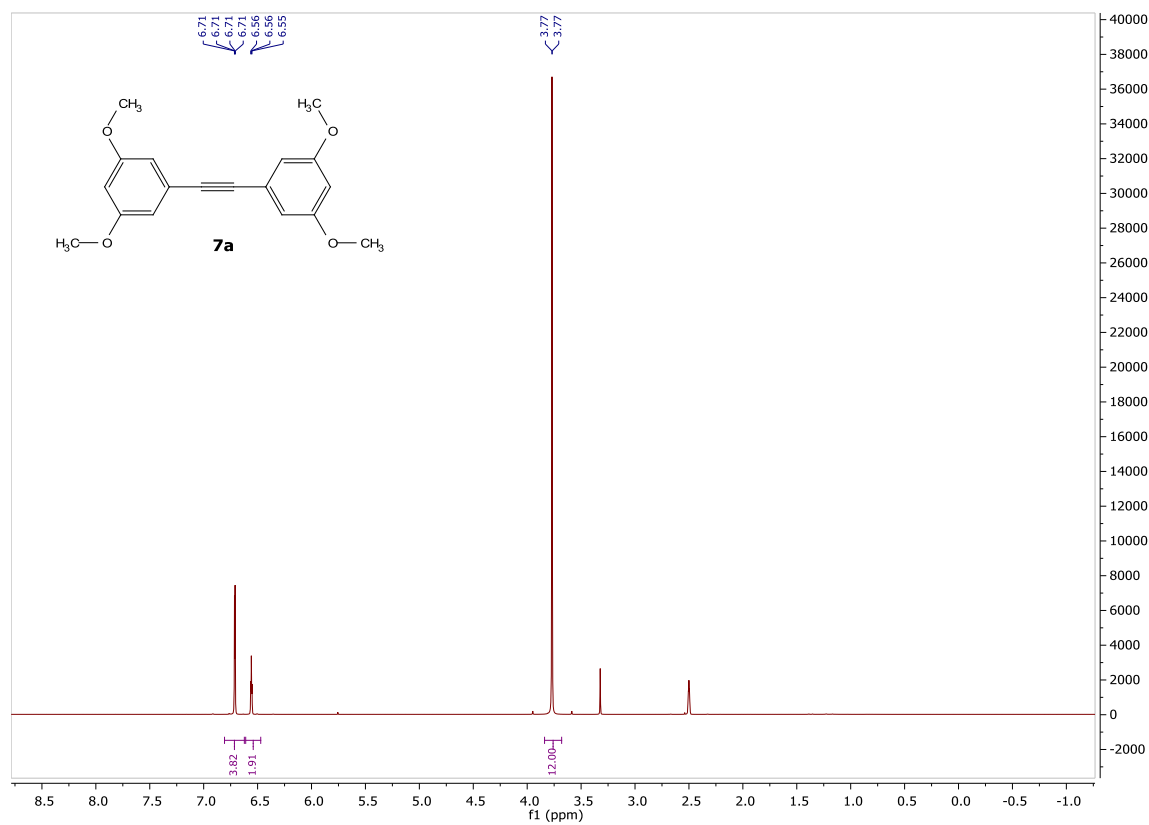

Figure S63:  $^{13}\text{C}$  NMR

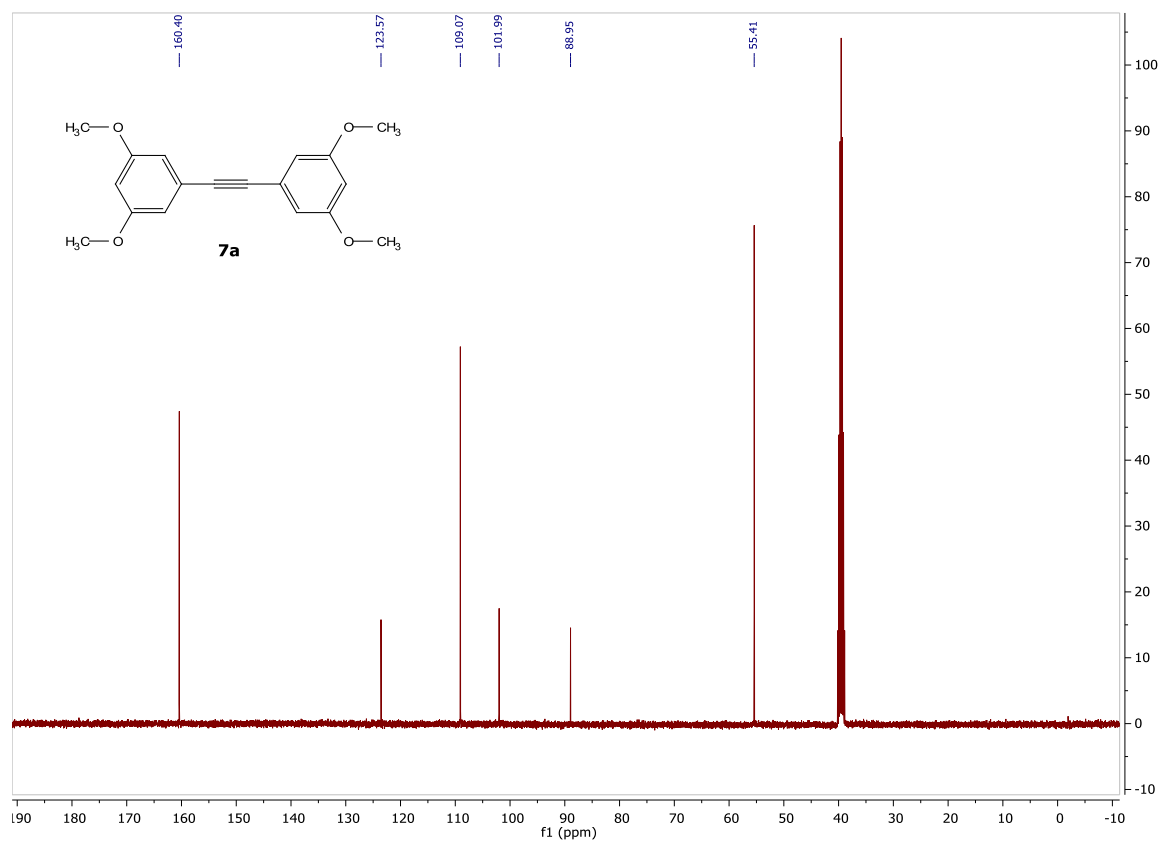





Figure S65:  $^{13}\text{C}$  NMR

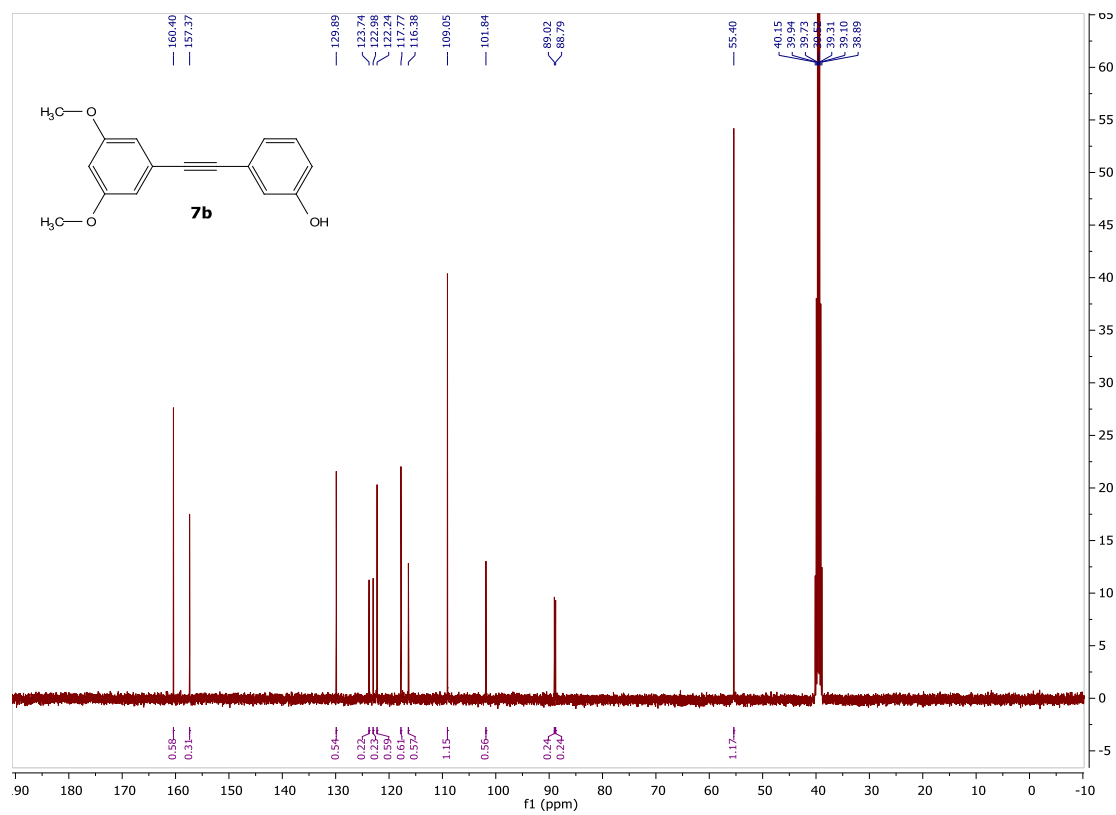

Figure S66:  $^1\text{H}$  NMR

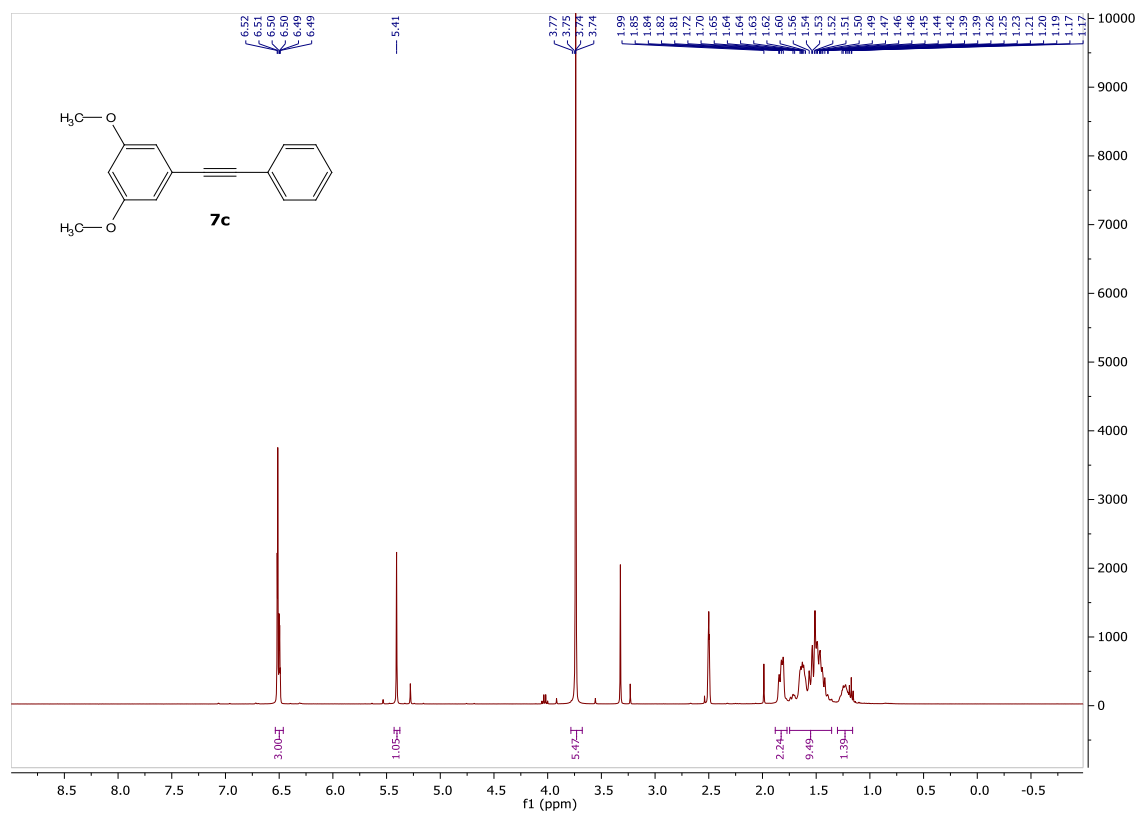

Figure S67:  $^{13}\text{C}$  NMR

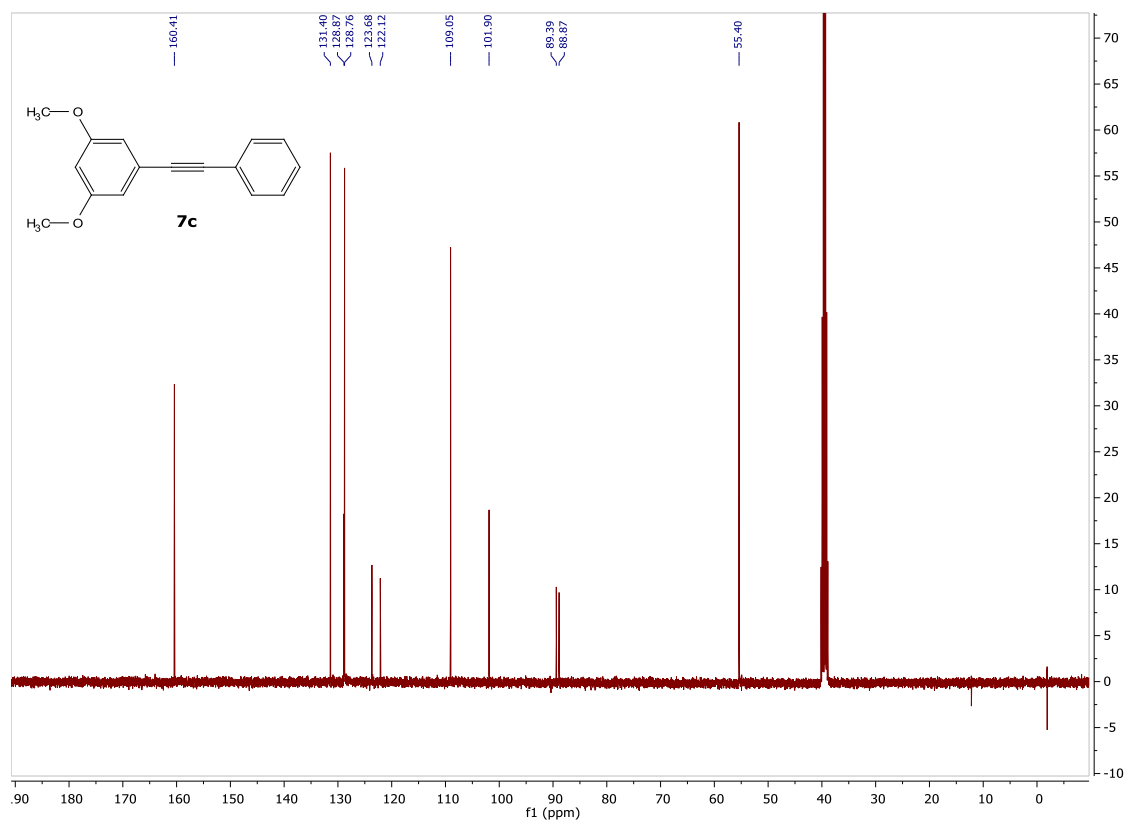

Figure S68:  $^1\text{H}$  NMR

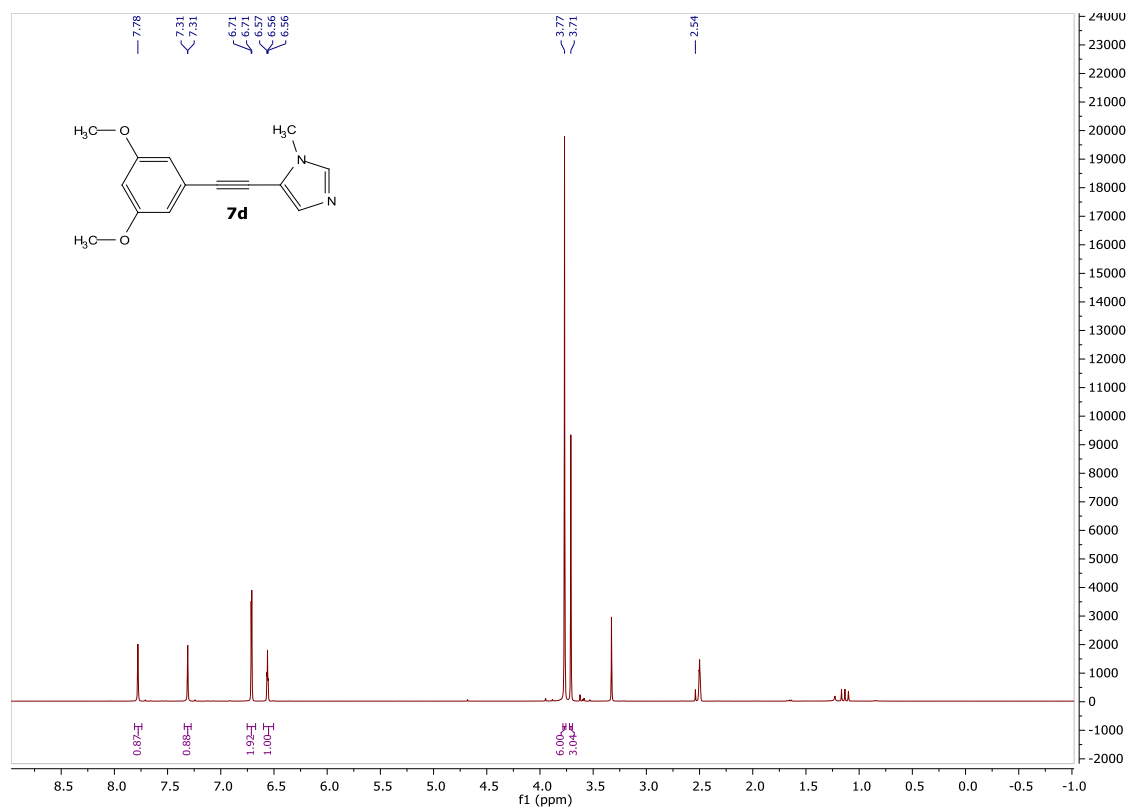

Figure S69:  $^{13}\text{C}$  NMR

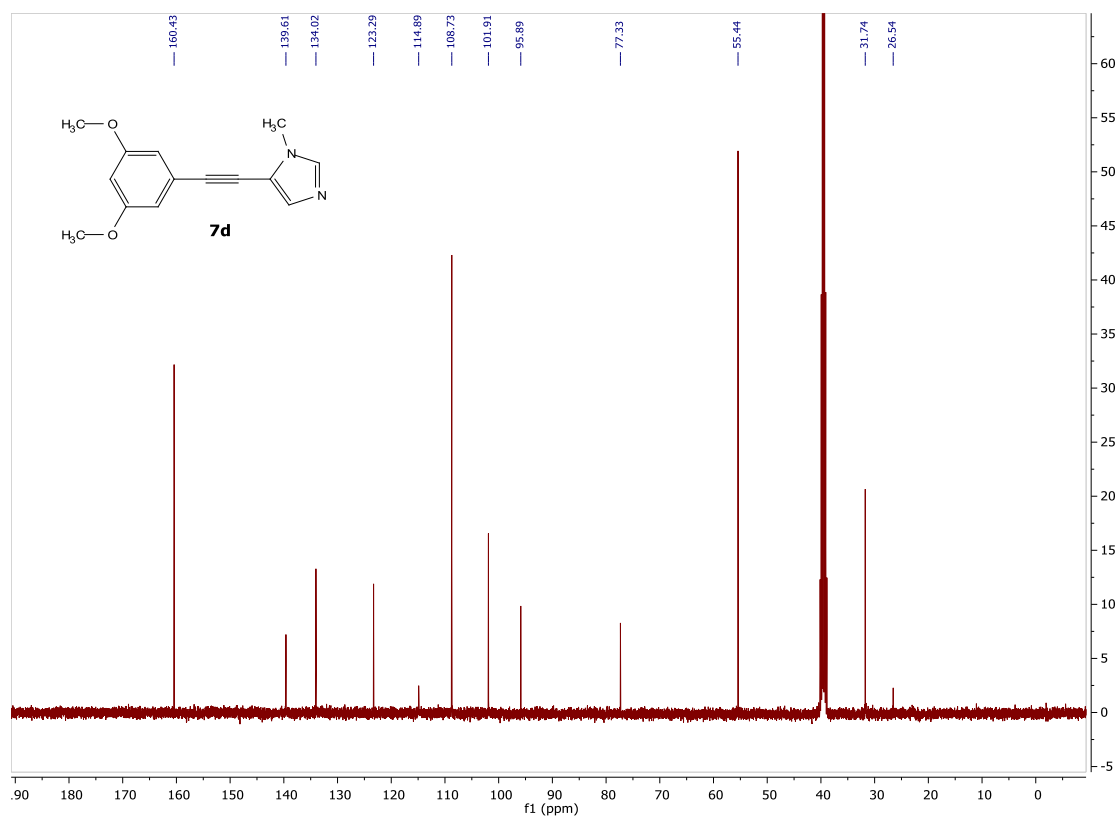

Figure S70:  $^1\text{H}$  NMR

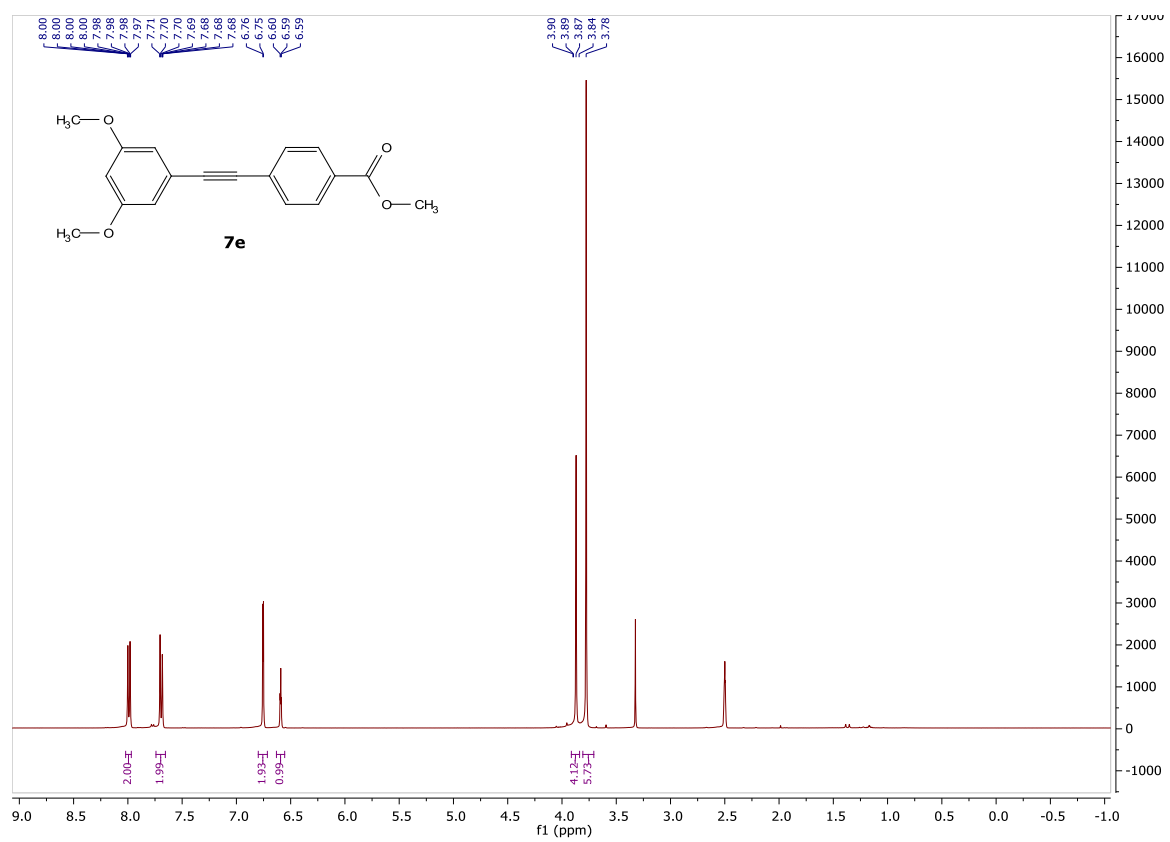

Figure S71:  $^{13}\text{C}$  NMR

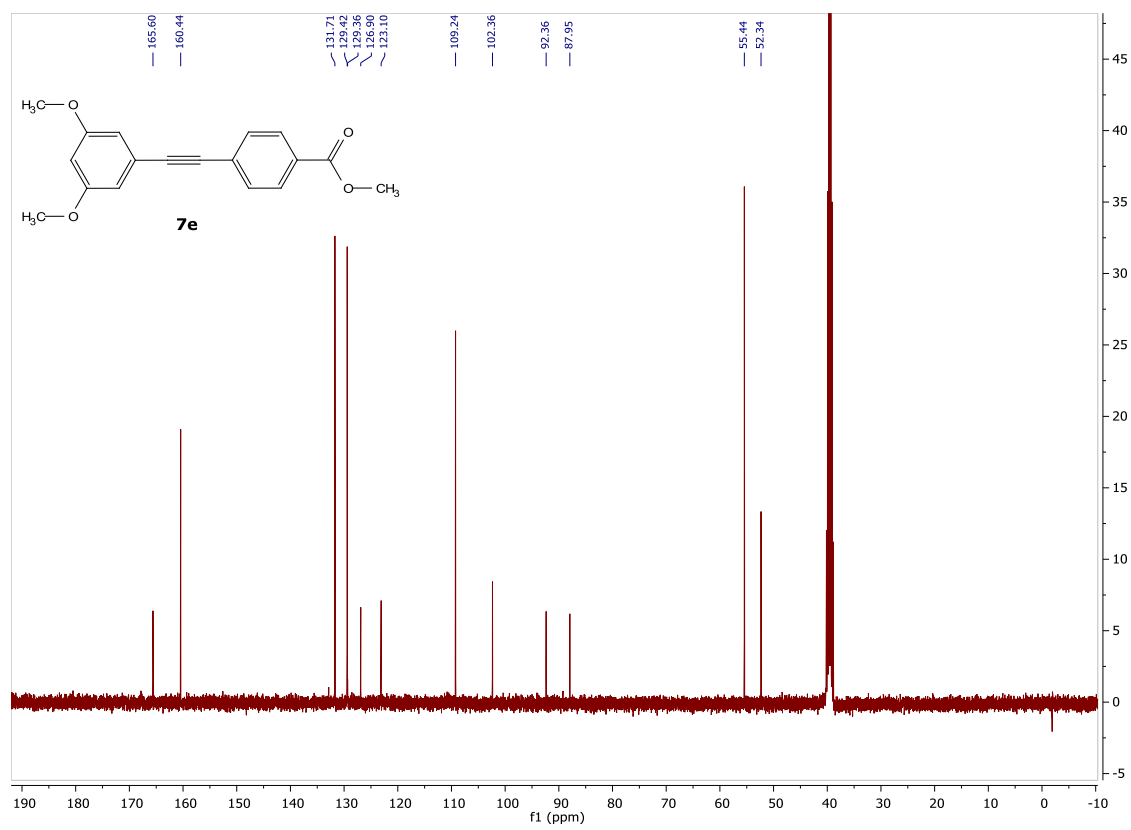

Figure S72:  $^1\text{H}$  NMR

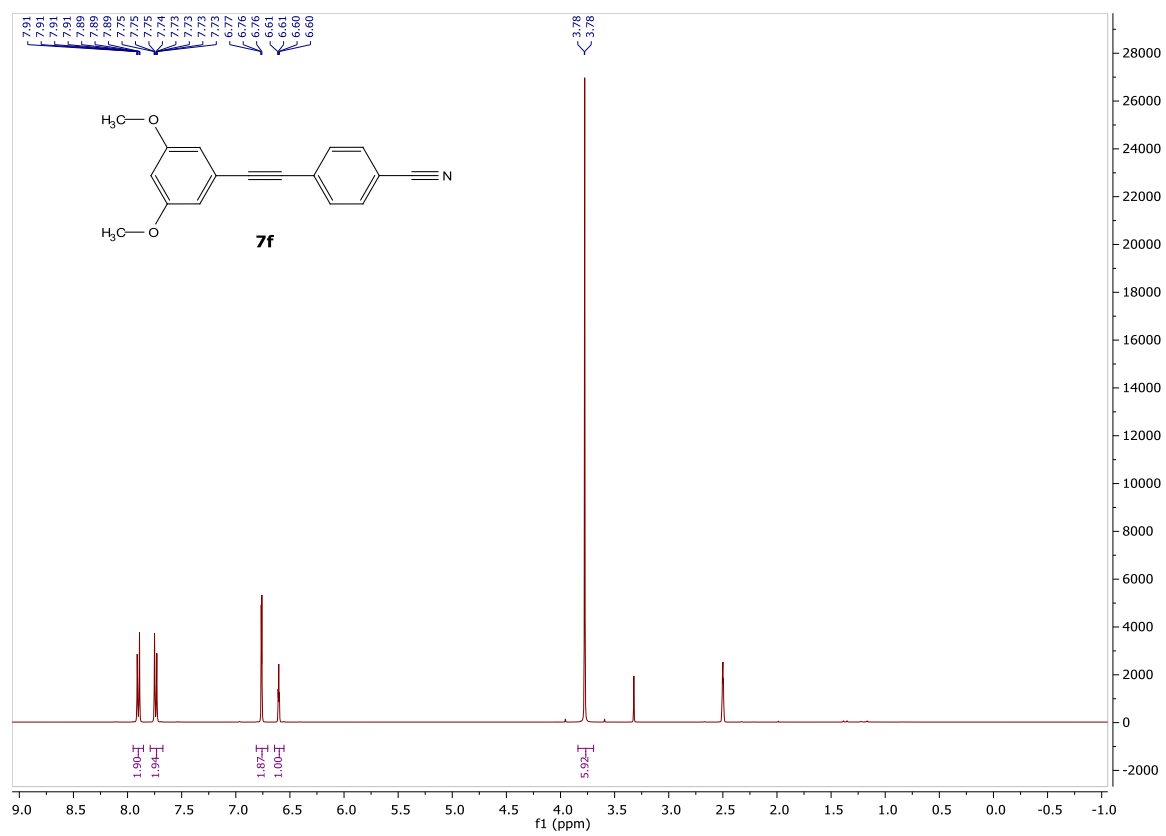



Figure S73:  $^{13}\text{C}$  NMR

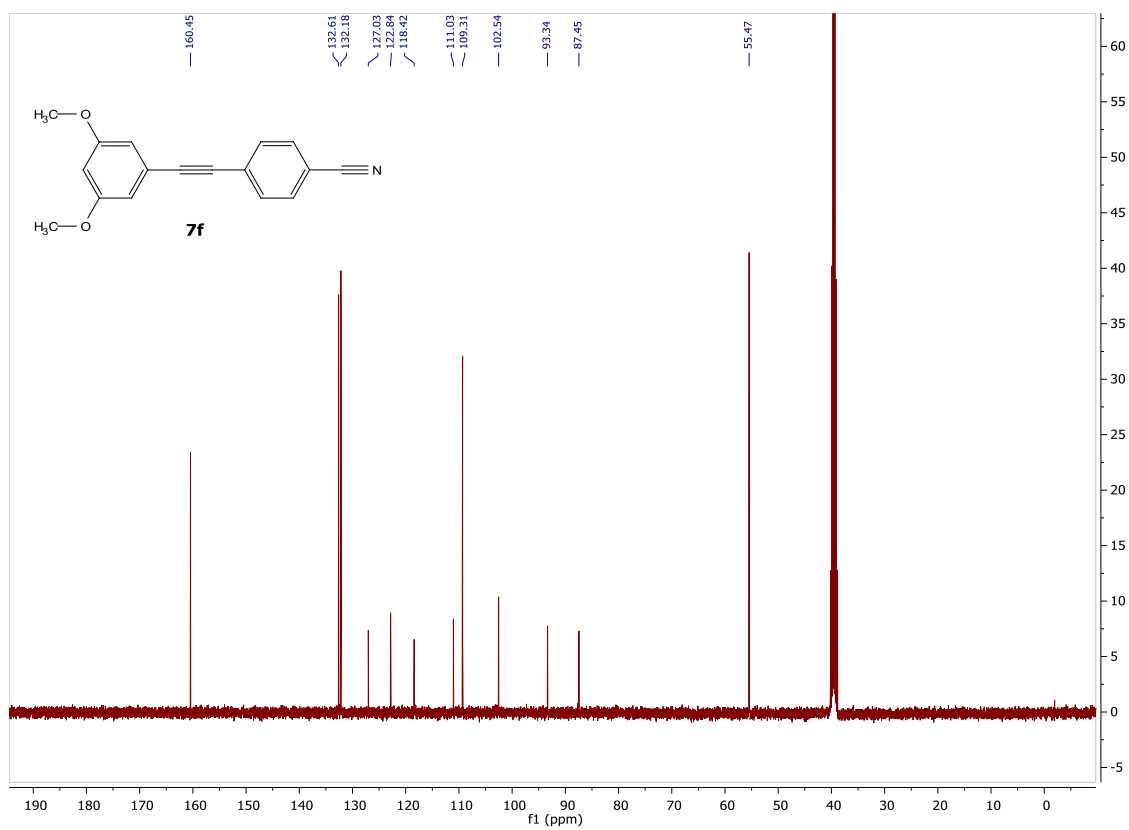

Figure S74:  $^1\text{H}$  NMR

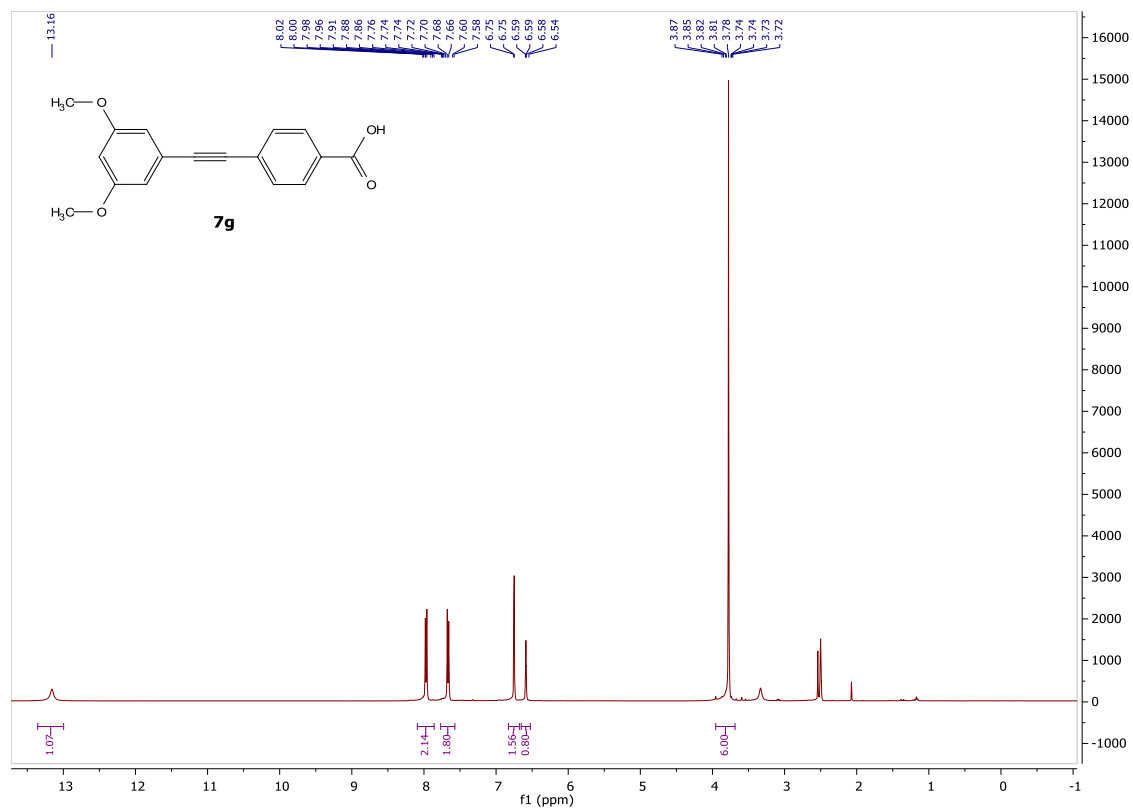

Figure S75:  $^{13}\text{C}$  NMR

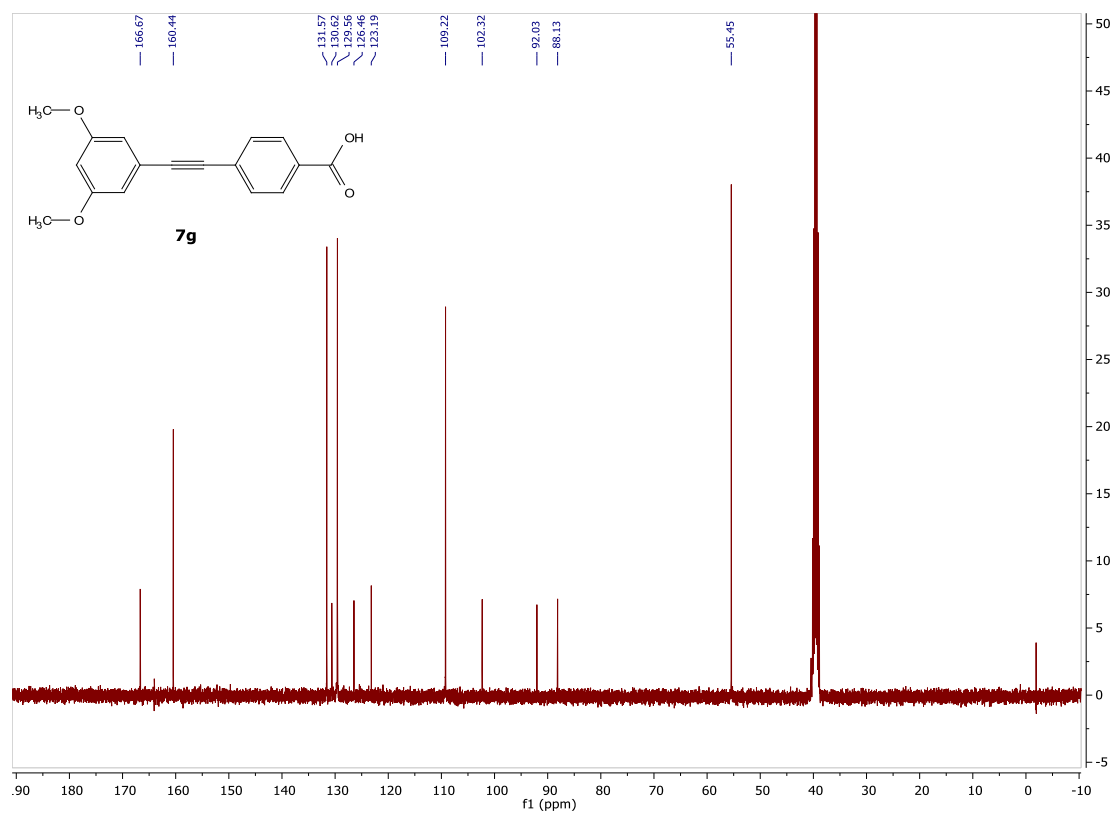

Figure S76:  $^1\text{H}$  NMR

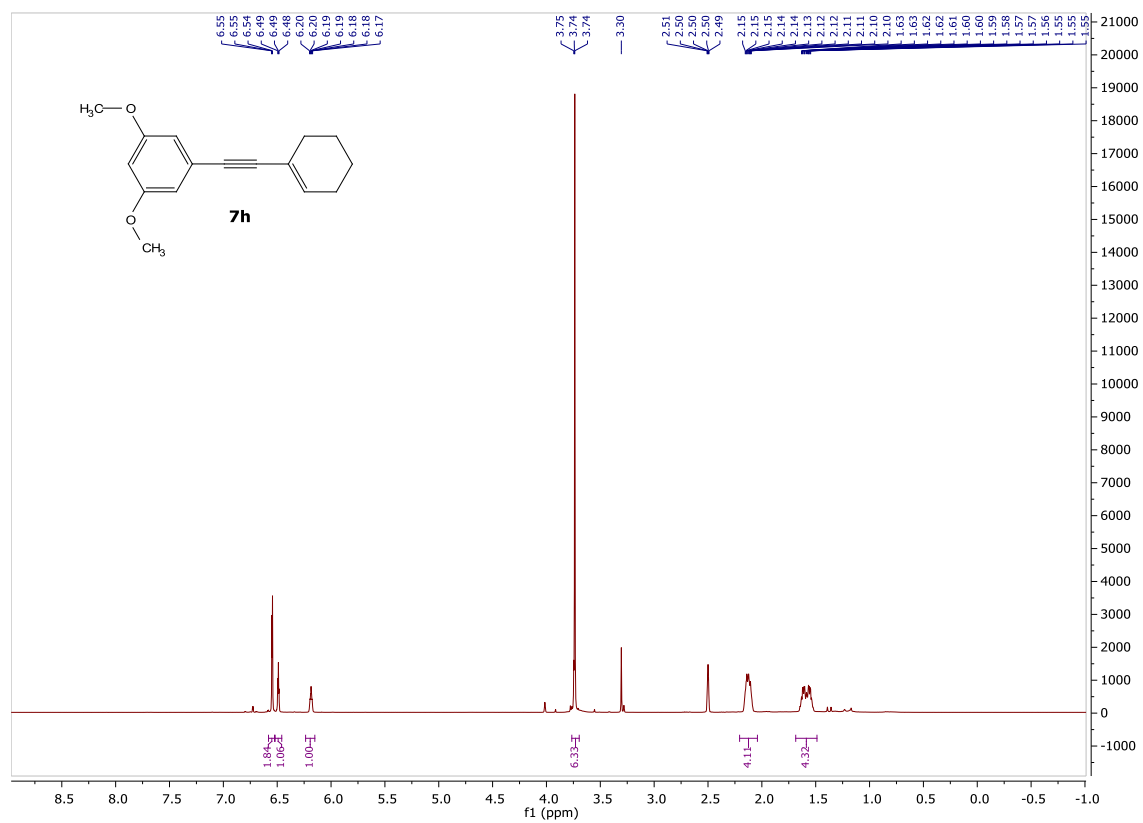

Figure S77:  $^{13}\text{C}$  NMR

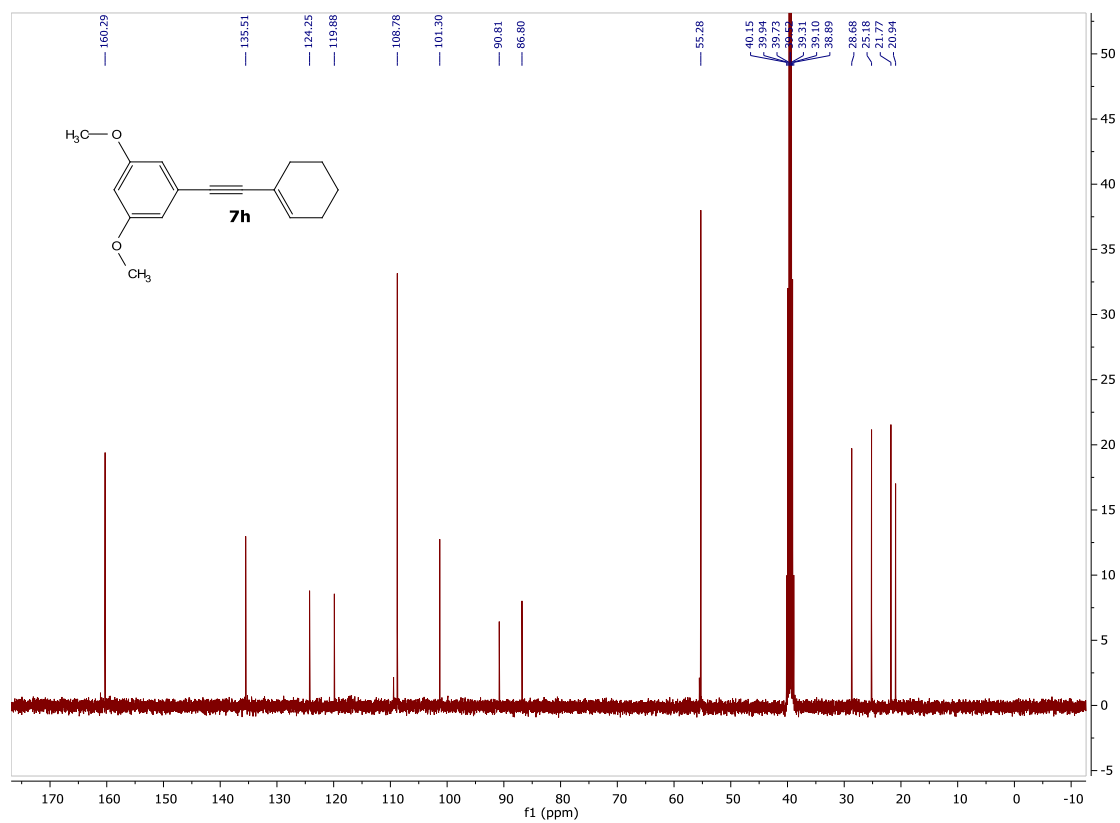

Figure S78:  $^1\text{H}$  NMR

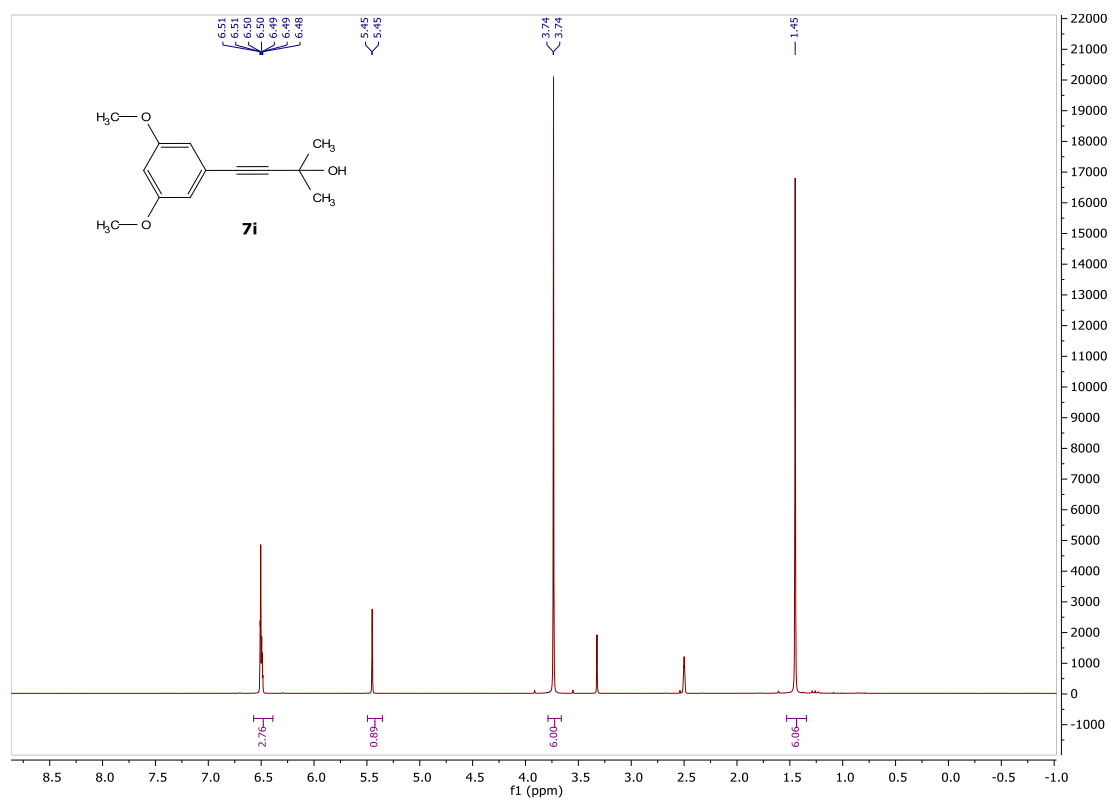

Figure S79:  $^{13}\text{C}$  NMR

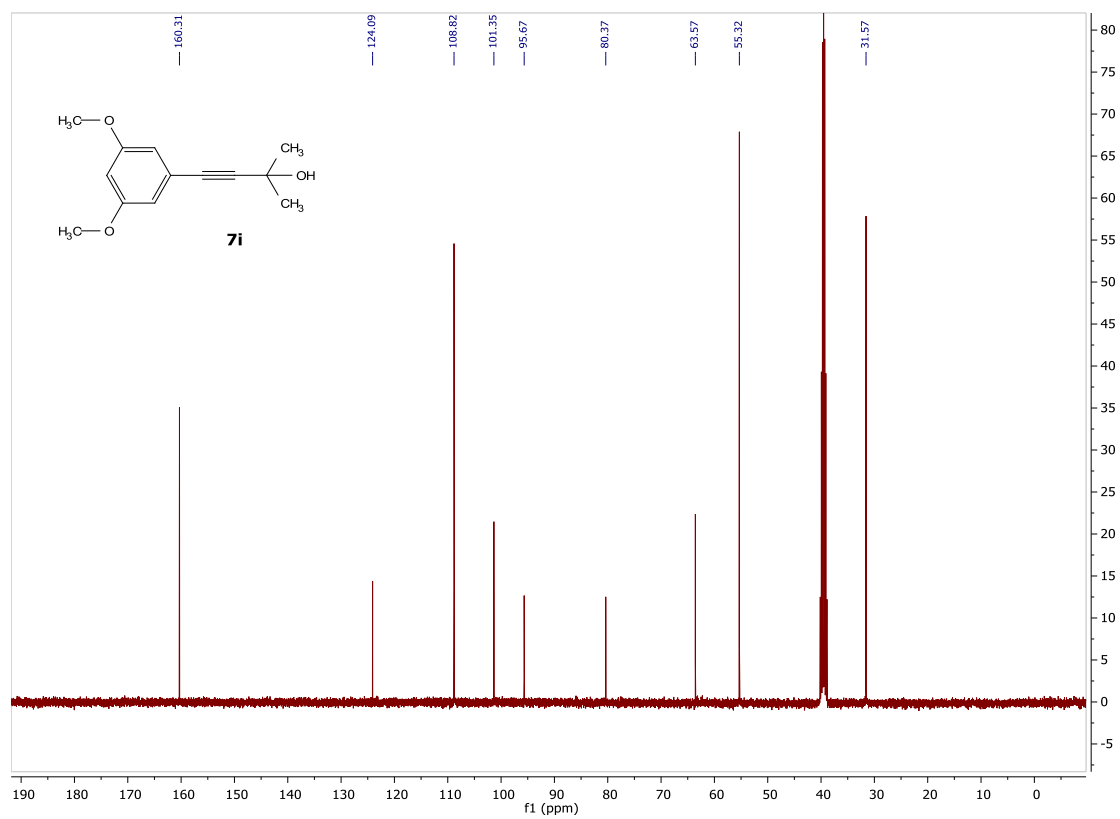

Figure S80:  $^1\text{H}$  NMR

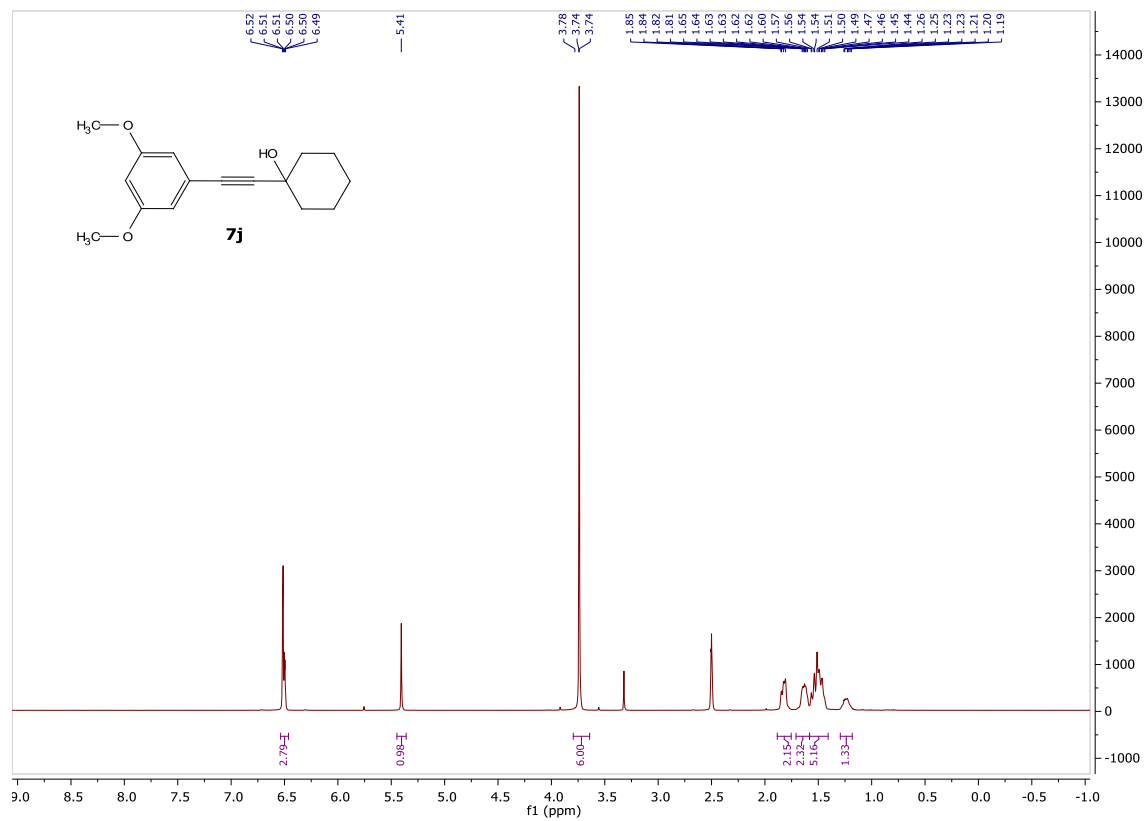



Figure S81:  $^{13}\text{C}$  NMR

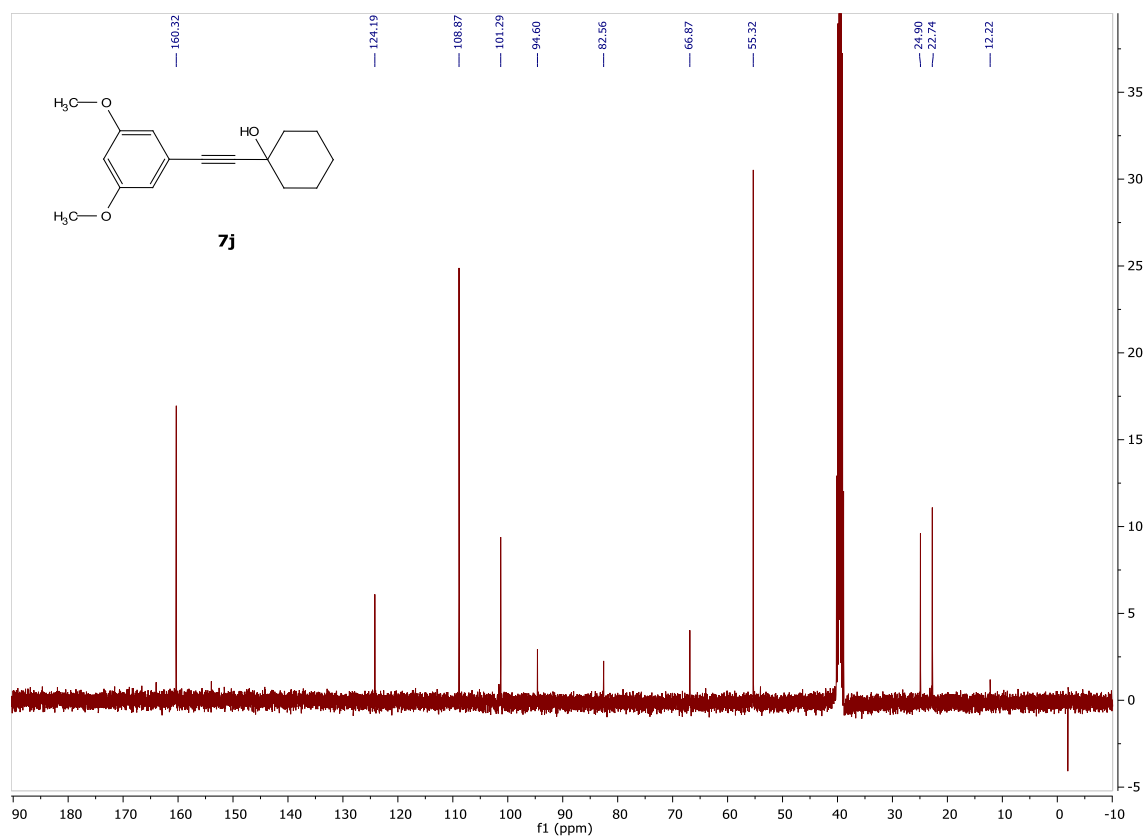

Figure S82:  $^1\text{H}$  NMR

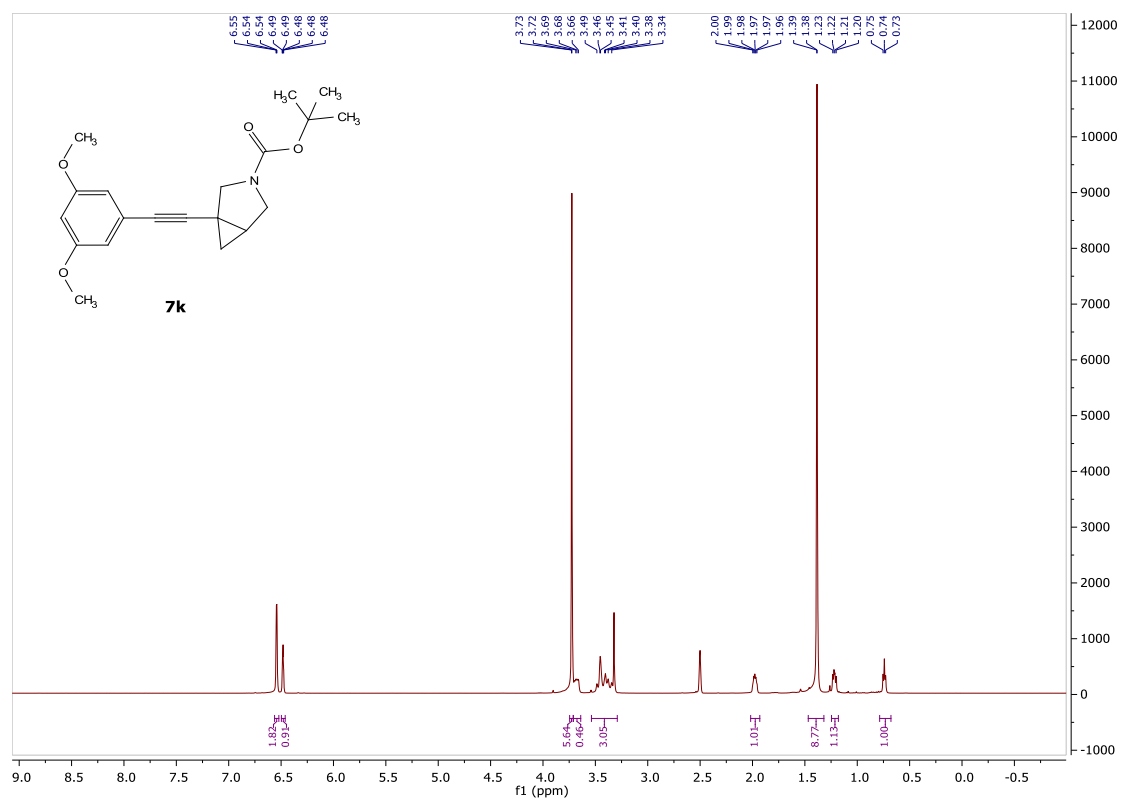

Figure S83:  $^{13}\text{C}$  NMR

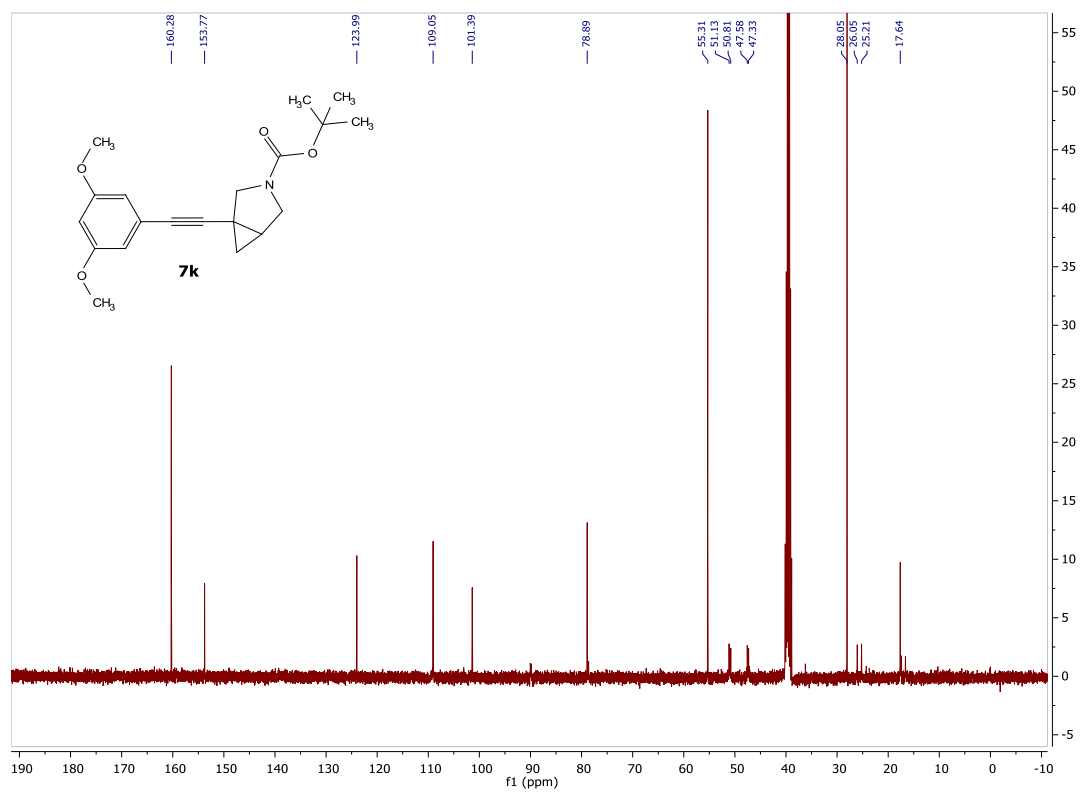

Figure S84: <sup>1</sup>H NMR

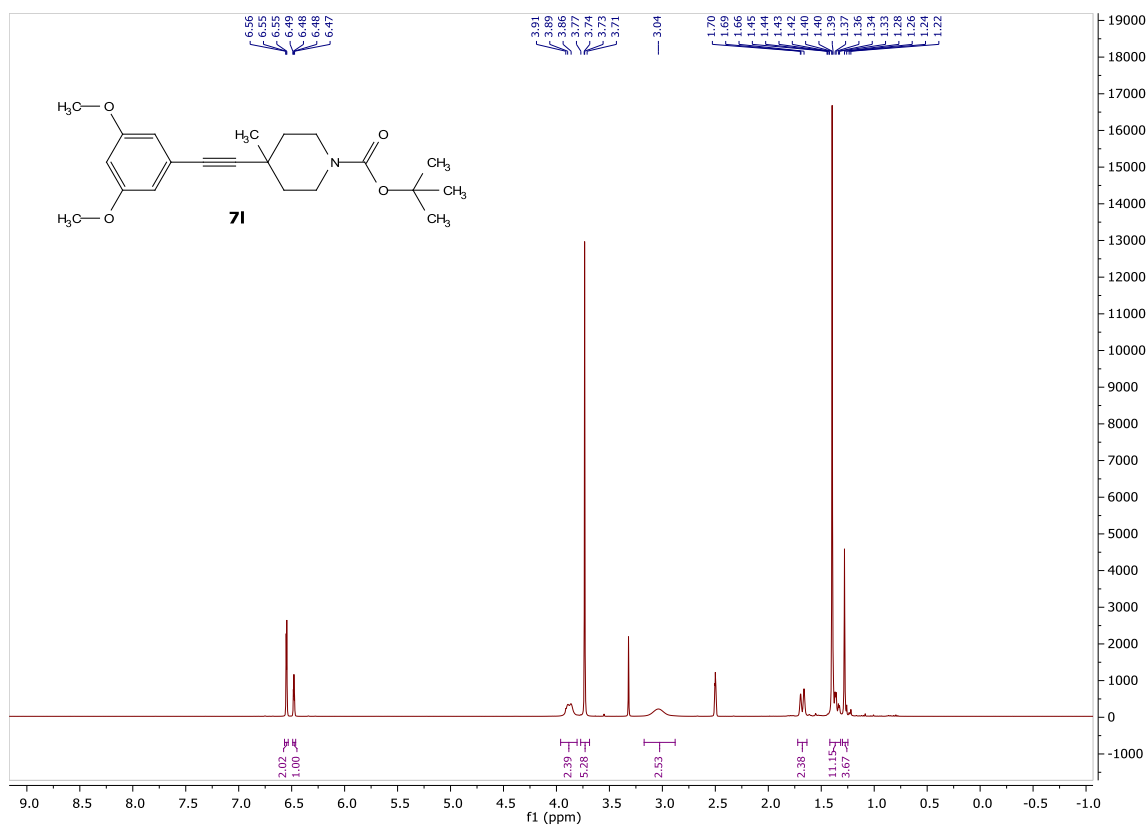

Figure S85:  $^{13}\text{C}$  NMR

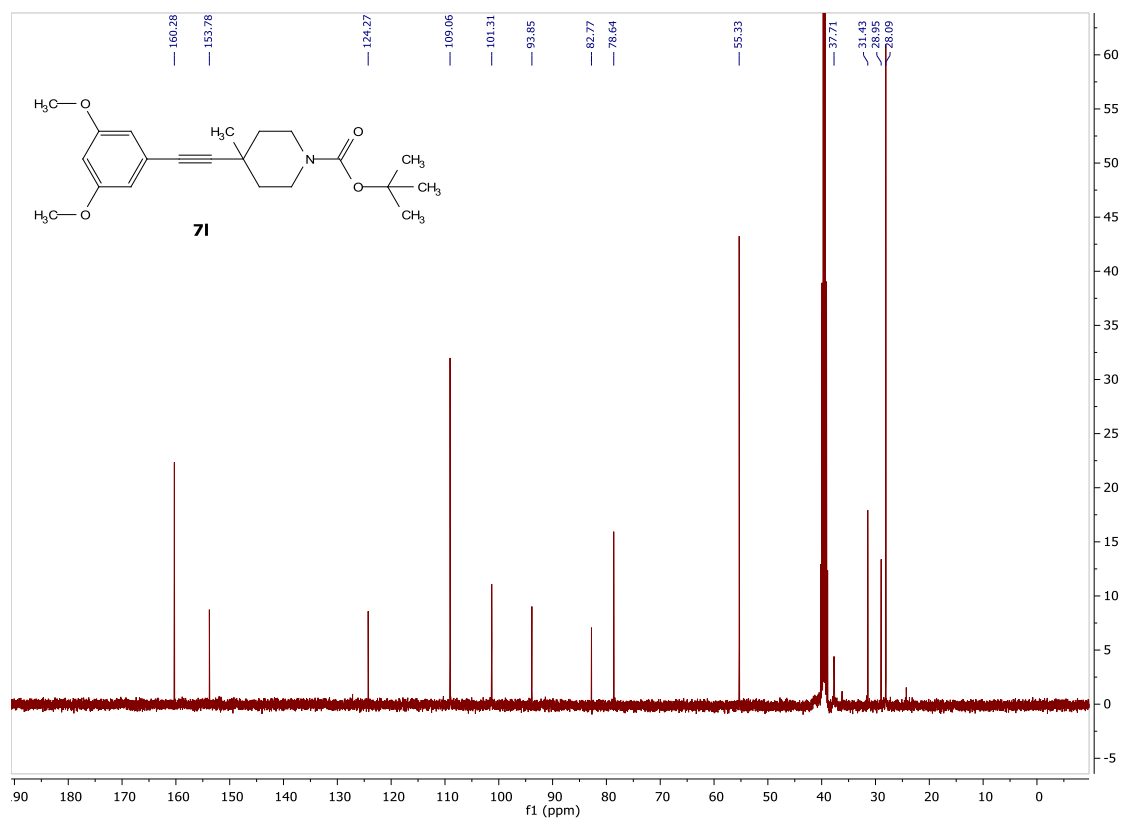

Figure S86:  $^1\text{H}$  NMR

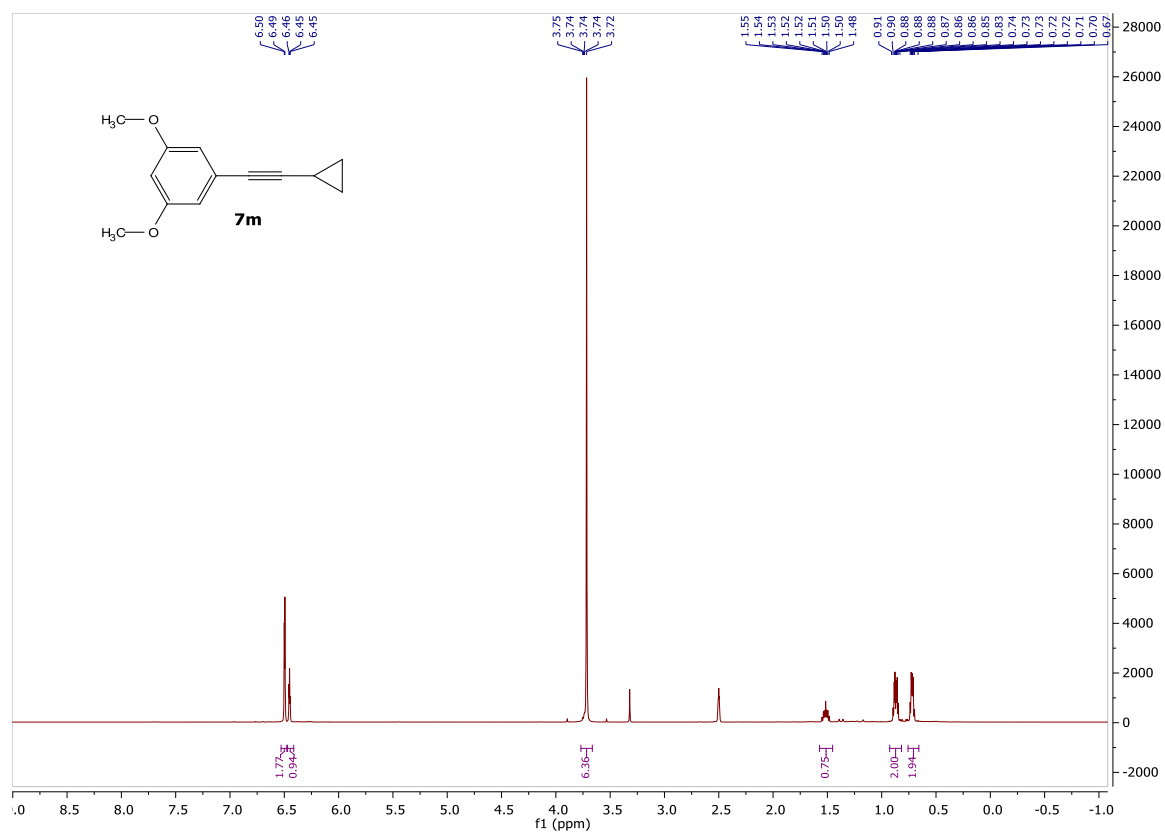

Figure S87:  $^{13}\text{C}$  NMR

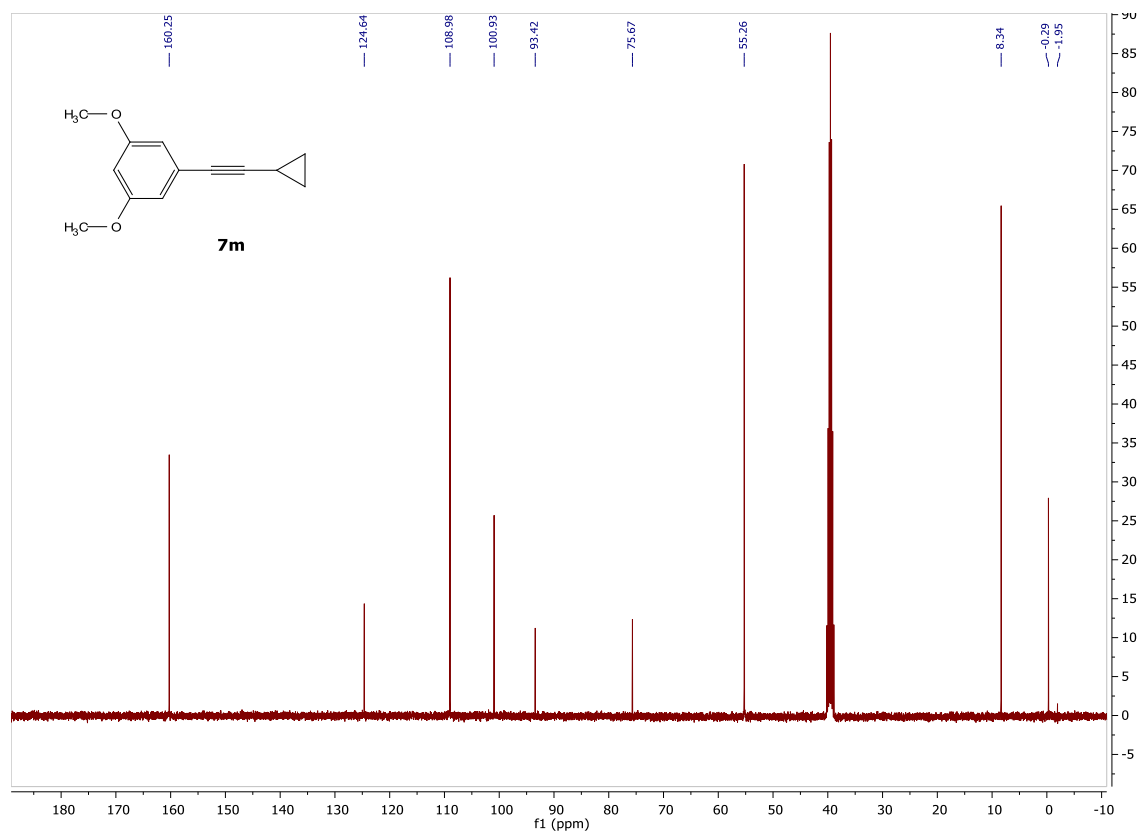

Figure S88:  $^1\text{H}$  NMR

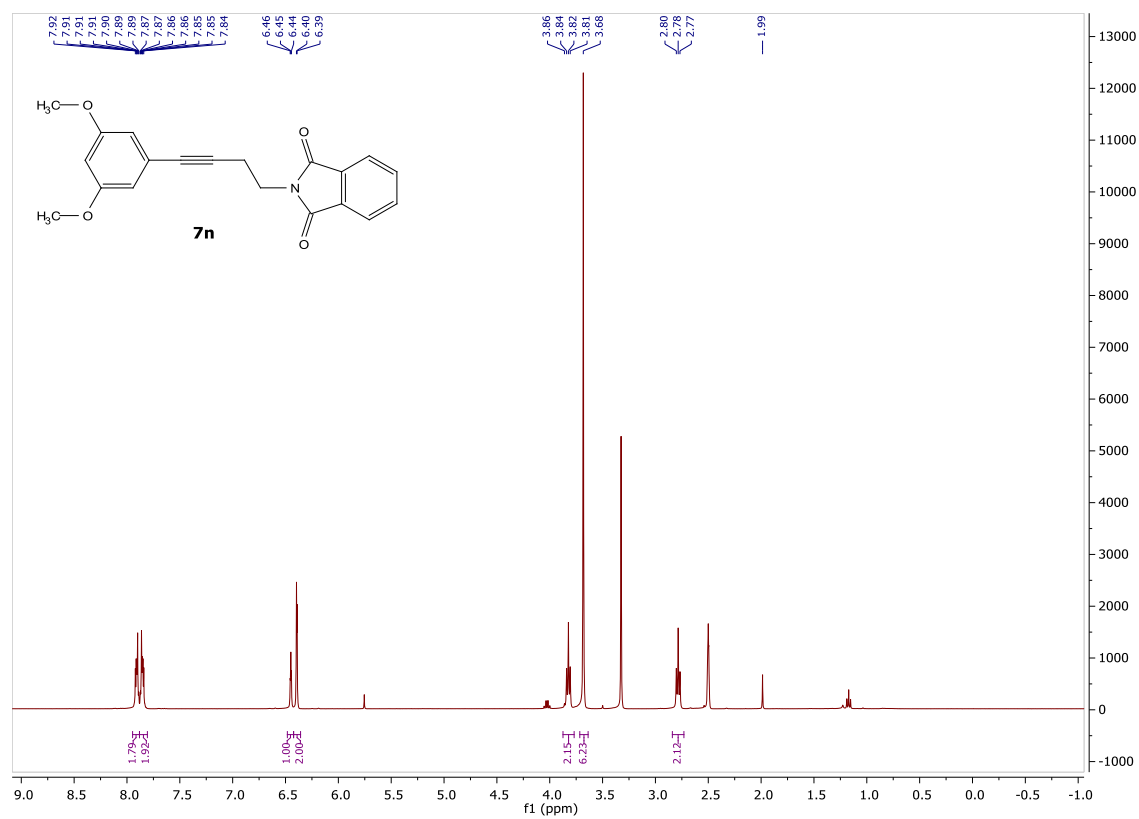



Figure S89:  $^{13}\text{C}$  NMR

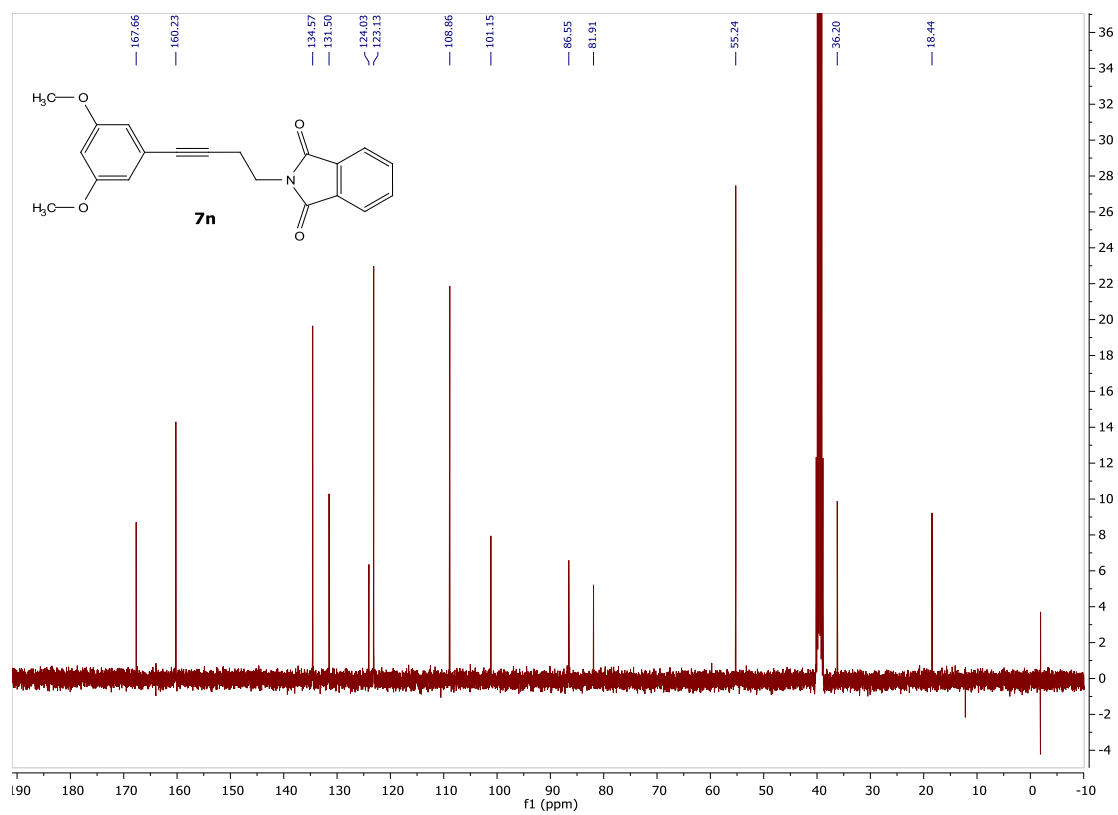

Figure S90:  $^1\text{H}$  NMR

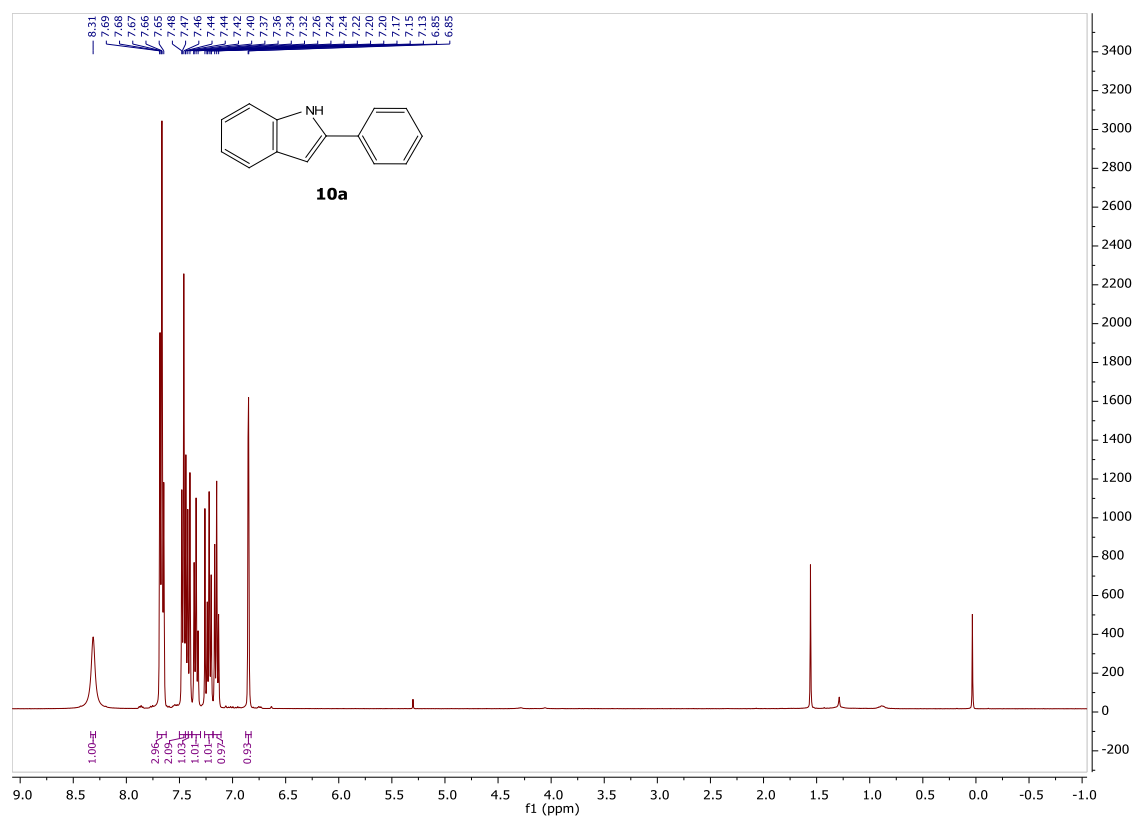

Figure S91:  $^{13}\text{C}$  NMR

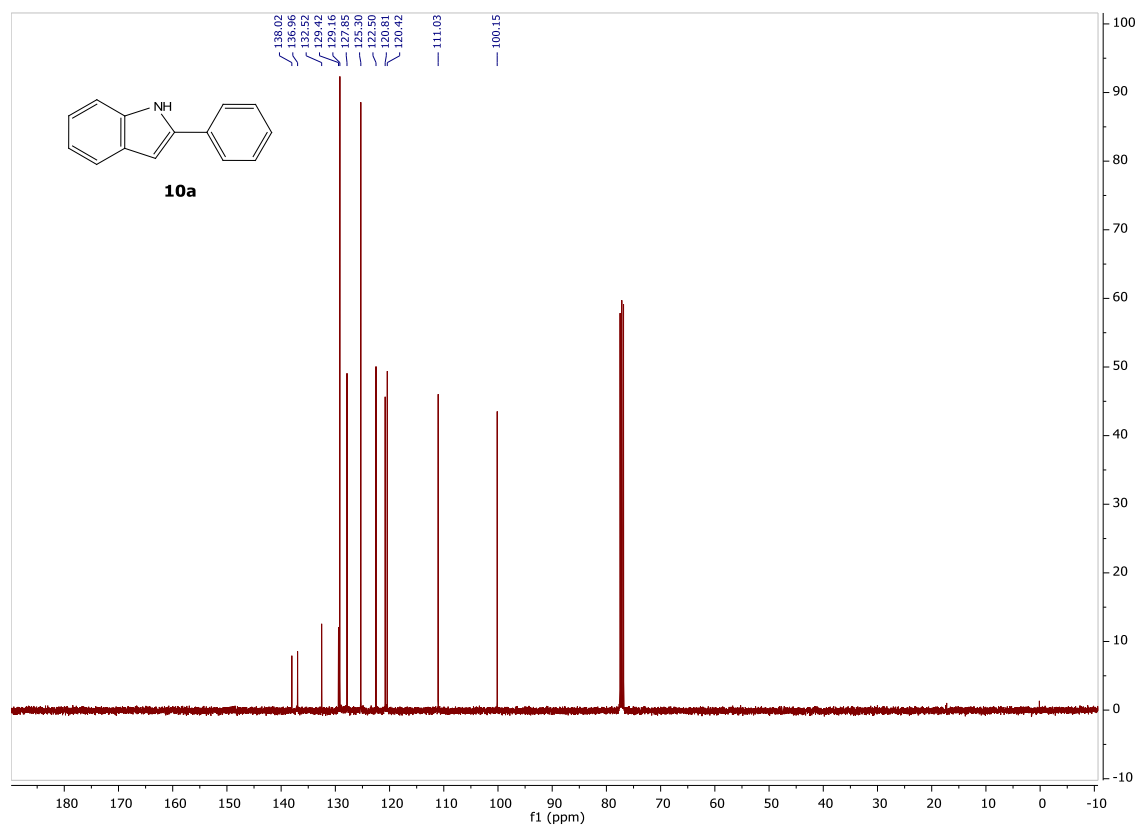

Figure S92: <sup>1</sup>H NMR

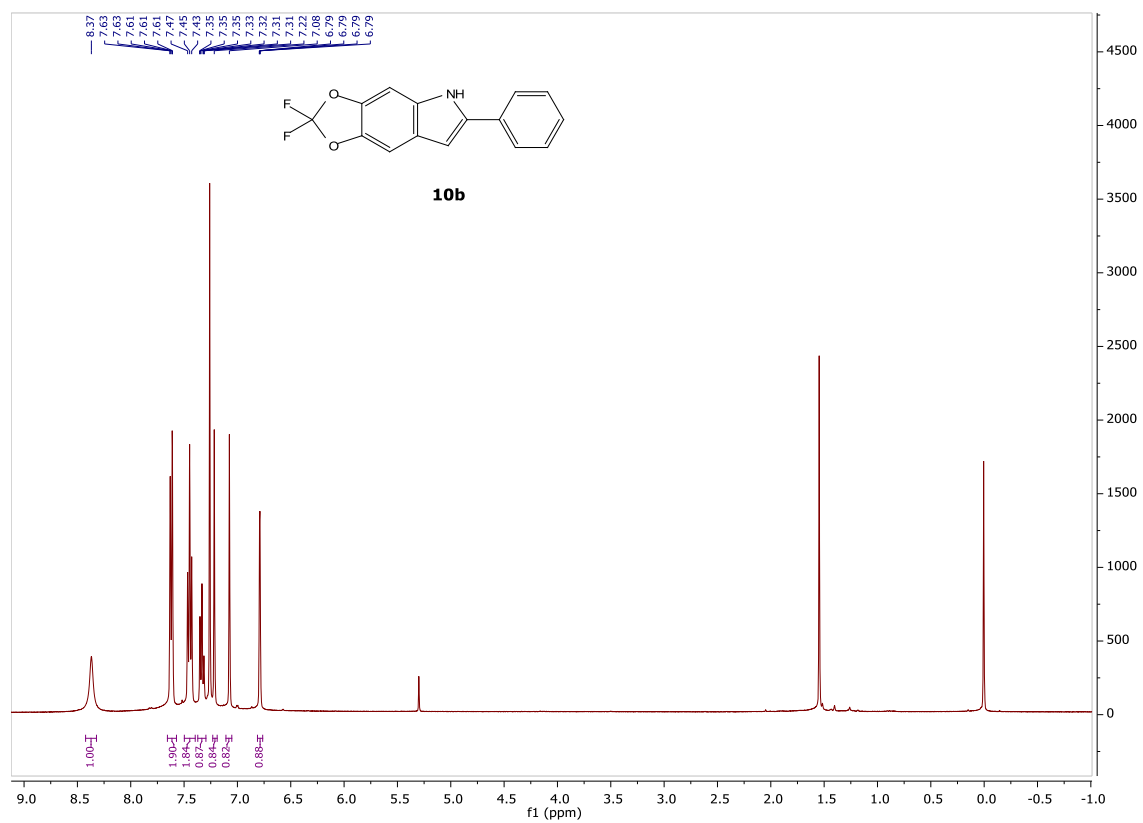

Figure S93:  $^{13}\text{C}$  NMR

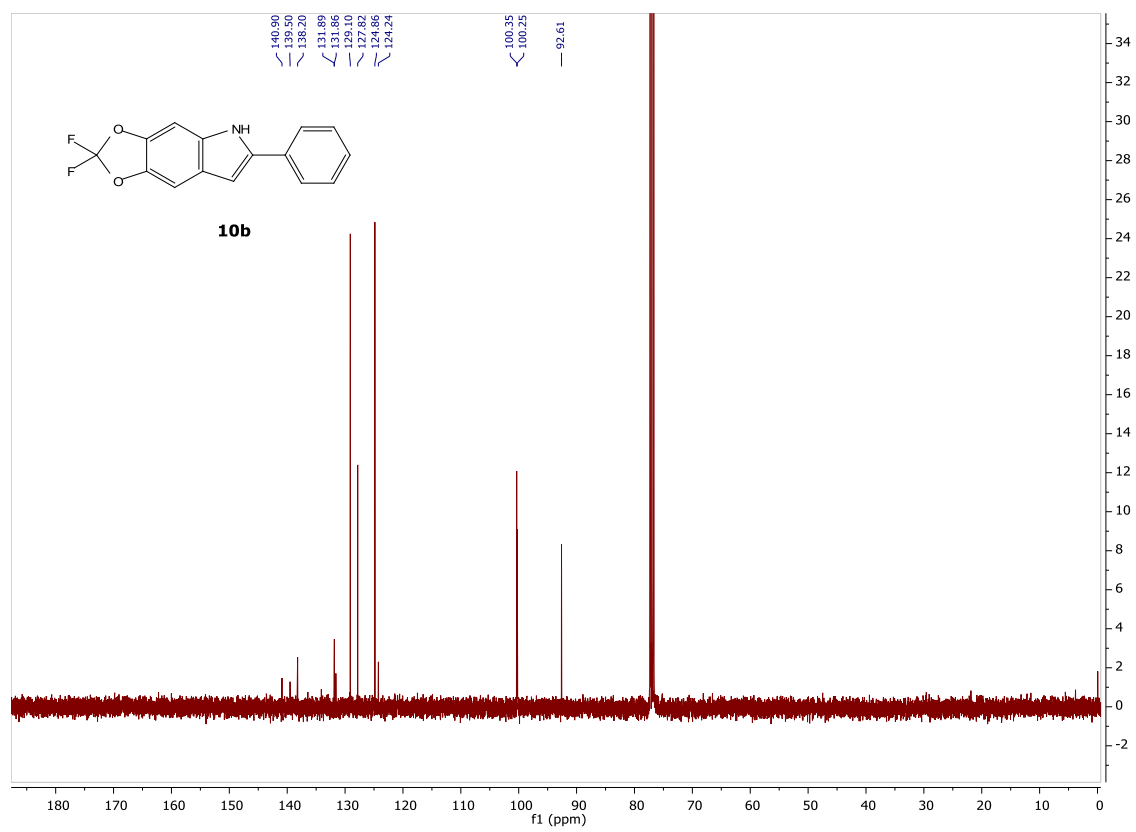

Figure S94: <sup>1</sup>H NMR

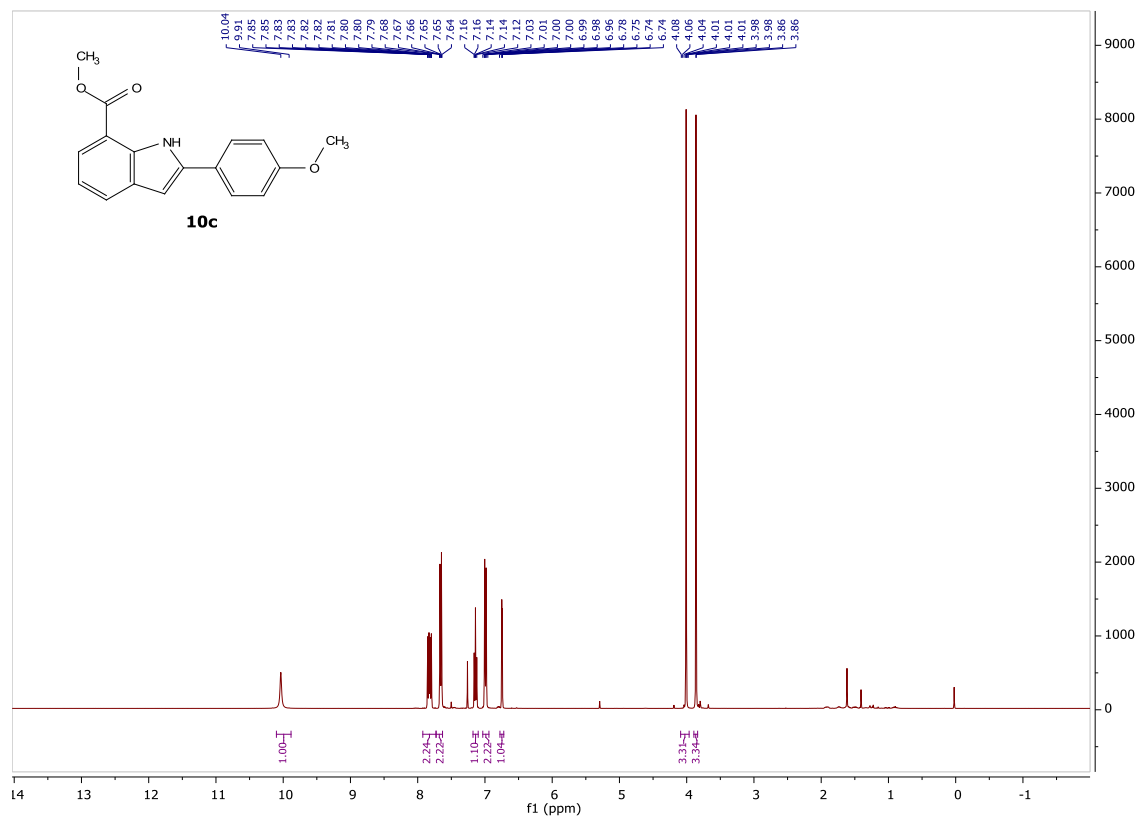

Figure S95:  $^{13}\text{C}$  NMR

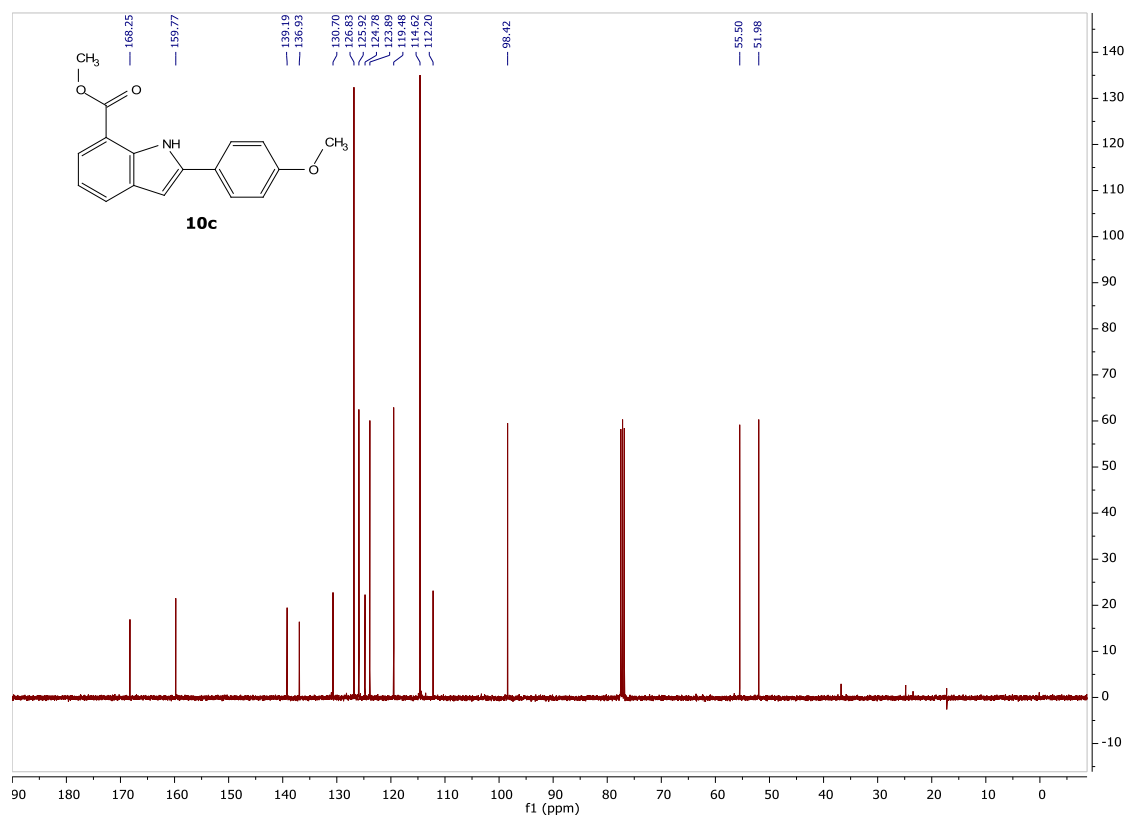

Figure S96: <sup>1</sup>H NMR

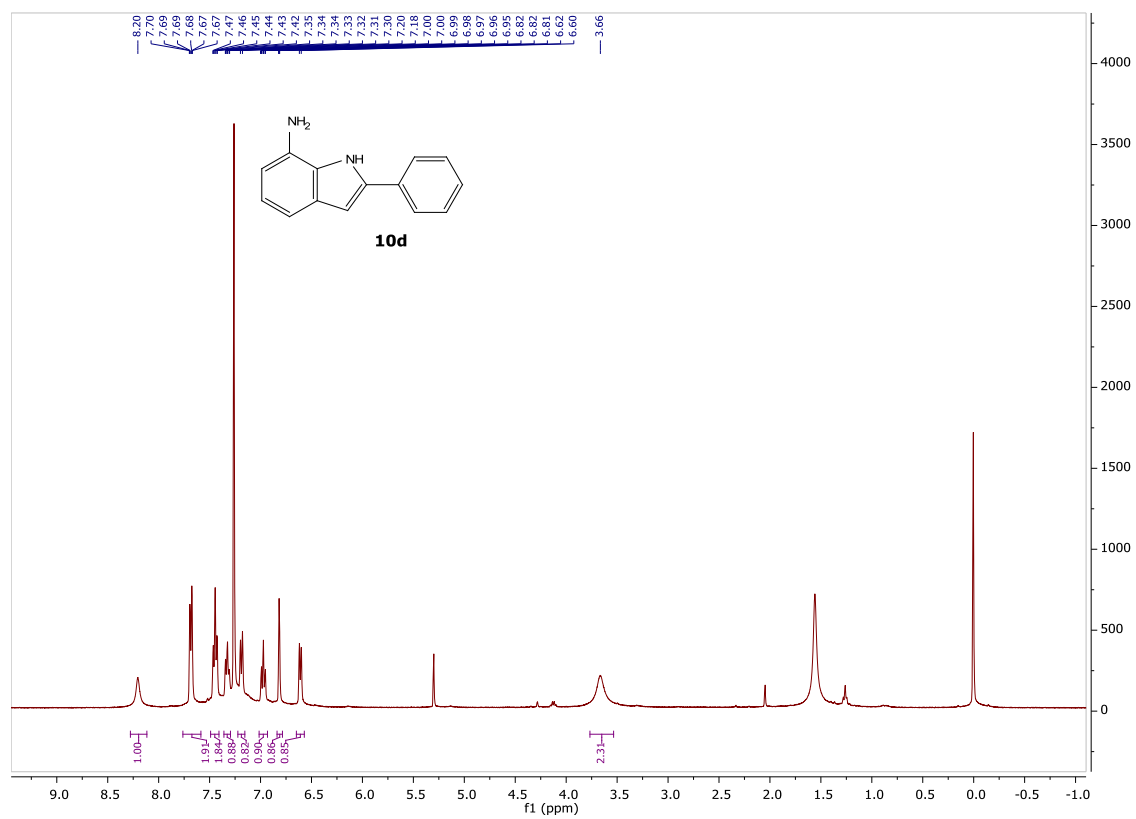



Figure S97:  $^{13}\text{C}$  NMR

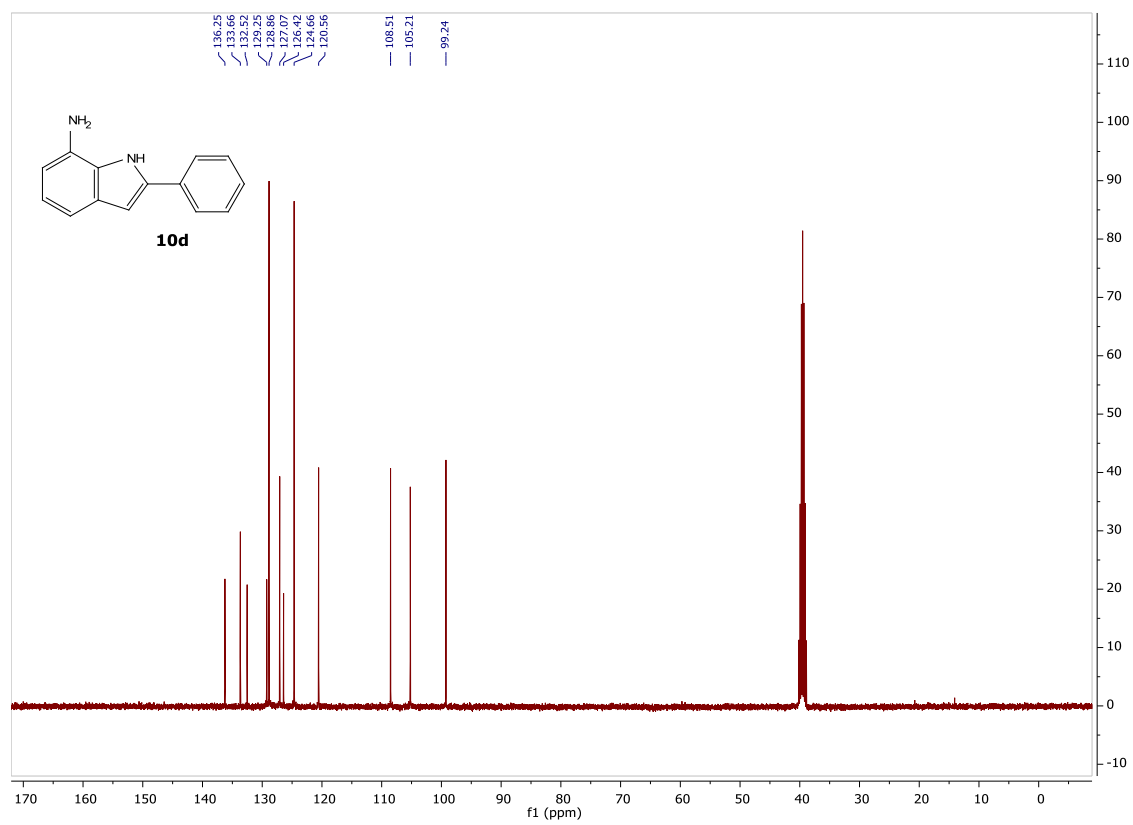

Figure S98: <sup>1</sup>H NMR

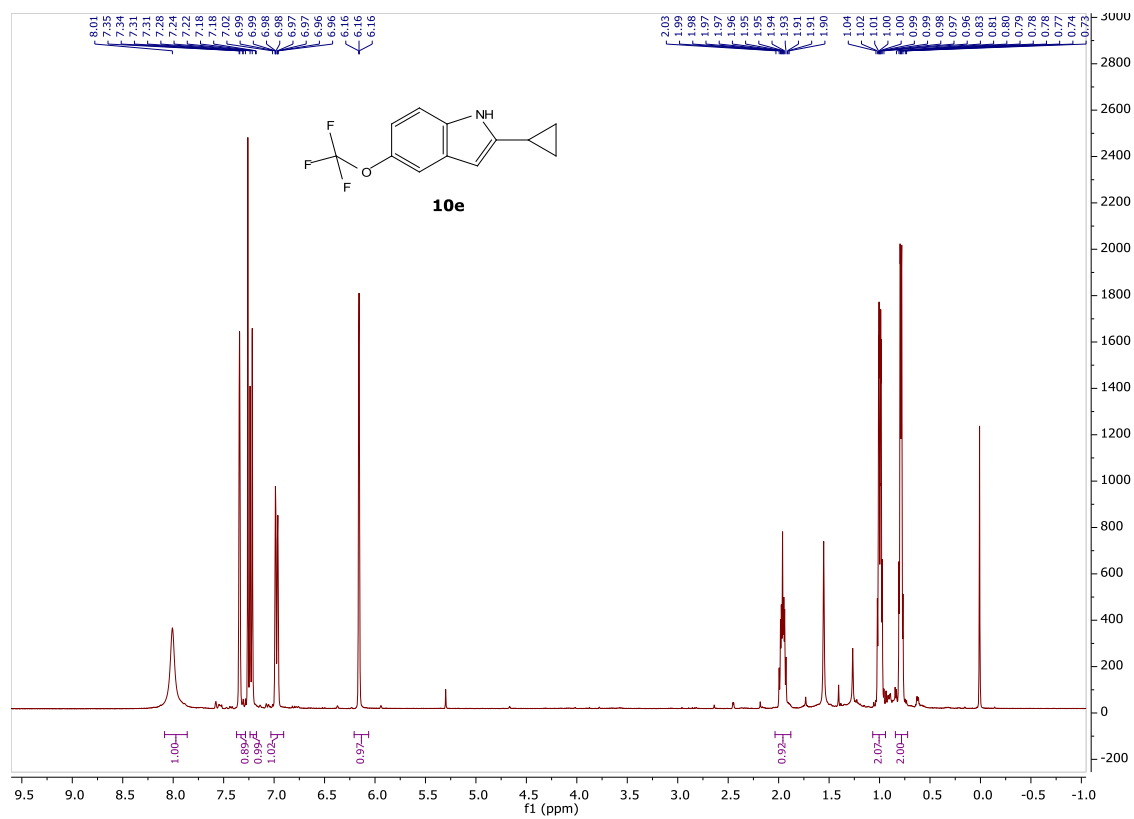

Figure S99:  $^{13}\text{C}$  NMR

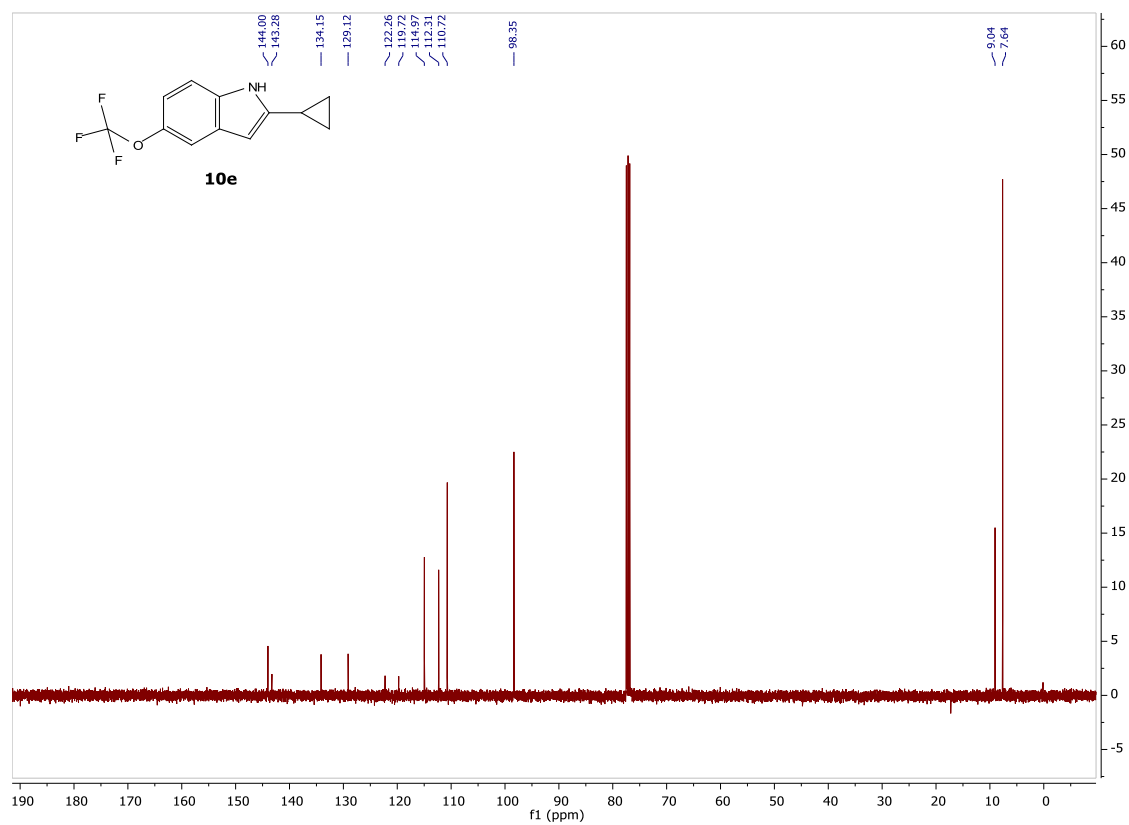

Figure S100:  $^1\text{H}$  NMR

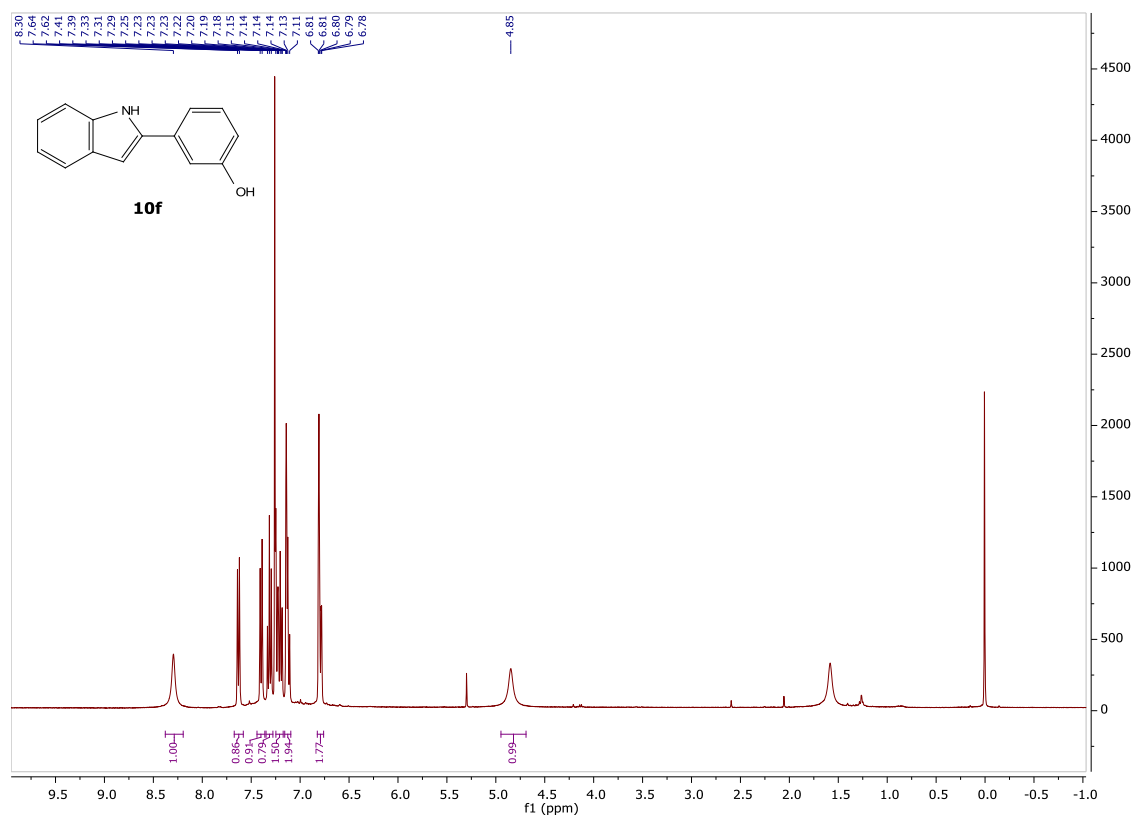

Figure S101:  $^{13}\text{C}$  NMR

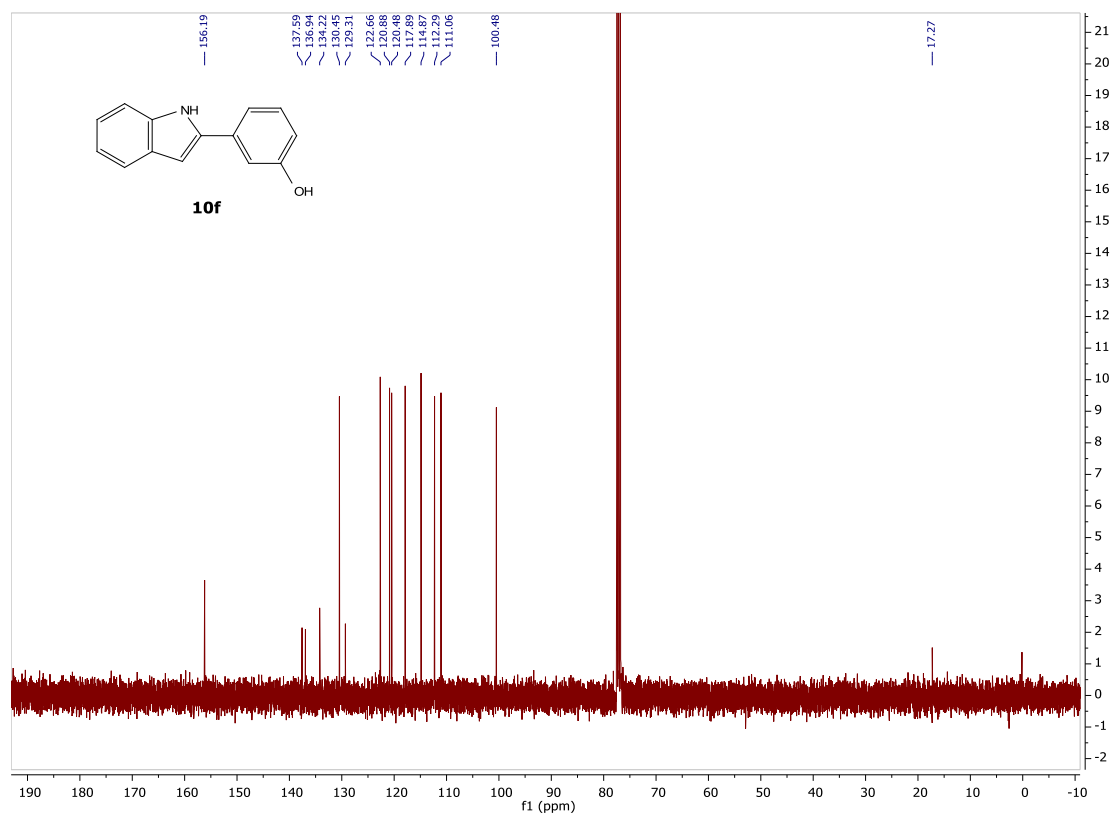

Supplement: ao8b01868_si_001.pdf [file ao8b01868_si_001.pdf]
